# Supplementary material for: Nuclear m6A reader YTHDC1 regulates alternative polyadenylation and splicing during mouse oocyte development
Source: PLoS Genet. 2018 May 25;14(5):e1007412. doi: 10.1371/journal.pgen.1007412 (PMC5991768; doi:10.1371/journal.pgen.1007412)
Supplement: S2 Table — FDR cutoff of 0.01 was used. (XLSX) [file pgen.1007412.s010.xlsx]

## Sheet: S2 Table Up_In_Ythdc1_cKO
NCBI Accession	Gene	baseMean	log2FoldChange	lfcSE	stat	pvalue	padj
NM_001001180	Zfp941	12.6068	4.17364	0.987579	4.22613	2.37746e-05	0.000122237
NM_001001326	St5	122.185	1.21835	0.335124	3.63552	0.000277421	0.00113755
NM_001001445	Trpv1	6.24371	4.34922	1.21767	3.57177	0.000354581	0.00141126
NM_001001447	Zscan22	22.4903	3.76725	0.75236	5.00724	5.52156e-07	3.87351e-06
NM_001001452	Tas2r143	5.6922	4.11647	1.23856	3.32359	0.000888653	0.00318623
NM_001001491	Tpm4	109.88	2.2335	0.521658	4.28154	1.85604e-05	9.74406e-05
NM_001001714	Sohlh1	437.874	7.64592	0.579263	13.1994	8.84576e-40	2.92064e-37
NM_001001806	Zfp36l2	1245.12	2.92559	0.298984	9.78511	1.30451e-22	8.18713e-21
NM_001001881	2510009E07Rik	49.8993	3.84491	0.643064	5.97904	2.24452e-09	2.38891e-08
NM_001001884	Nckap5l	81.9386	4.6295	0.747056	6.19699	5.75524e-10	6.69813e-09
NM_001001892	H2-K1	1241.15	2.90233	0.279087	10.3994	2.49583e-25	2.0714e-23
NM_001001984	Kdm2a	2504.24	0.755604	0.229405	3.29375	0.000988607	0.00350899
NM_001001985	Nat8l	770.925	6.79016	0.365016	18.6024	3.07451e-77	1.55652e-73
NM_001003950	Rab3ip	724.519	1.17071	0.370513	3.15971	0.00157929	0.00530083
NM_001004062	Crtc1	1204.45	0.946372	0.232533	4.06983	4.70472e-05	0.000227348
NM_001004143	Usp22	869.356	1.91586	0.264768	7.23599	4.62158e-13	8.41637e-12
NM_001004176	Maml3	106.803	5.41034	0.626576	8.63476	5.885e-18	1.98185e-16
NM_001004191	Gm5617	320.335	1.23105	0.339709	3.62385	0.000290249	0.00118217
NM_001004363	Nuak1	131.595	4.76029	0.441347	10.7858	4.01659e-27	4.05272e-25
NM_001004365	Actr3b	46.4203	1.73378	0.505563	3.4294	0.000604922	0.00226909
NM_001005223	Znhit3	402.583	2.85341	0.321231	8.88274	6.52339e-19	2.47693e-17
NM_001005419	Ado	429.687	3.84811	0.428145	8.98786	2.52088e-19	9.99663e-18
NM_001005423	Mreg	532.1	1.04461	0.342518	3.04978	0.00229007	0.00734409
NM_001005426	Zcwpw1	376.88	2.07207	0.419933	4.93429	8.04415e-07	5.46153e-06
NM_001005477	Barhl2	15.2368	5.62265	1.12508	4.99757	5.80563e-07	4.04848e-06
NM_001005507	Smg7	352.992	1.01006	0.330931	3.05219	0.00227178	0.00729777
NM_001005509	Eif2a	2652.09	1.05833	0.248981	4.25065	2.13149e-05	0.000110526
NM_001005868	Erbb2ip	60.6012	1.98244	0.59133	3.35251	0.000800833	0.00290843
NM_001007568	Zfp251	46.4069	1.62937	0.506636	3.21605	0.00129968	0.00445789
NM_001007569	Pnmal1	25.5025	3.60143	0.703543	5.11899	3.07177e-07	2.25491e-06
NM_001007570	Slc25a42	150.914	5.902	0.505503	11.6755	1.70049e-31	2.48336e-29
NM_001007576	Gucy2f	14.8785	3.61363	0.931887	3.87776	0.000105423	0.000470099
NM_001007581	2810408M09Rik	134.327	1.46816	0.463421	3.1681	0.00153439	0.00516155
NM_001008498	Wdr34	24.2294	2.32046	0.709242	3.27175	0.00106885	0.00375606
NM_001008542	Mxi1	8.2867	4.7206	1.19307	3.95669	7.5995e-05	0.000348389
NM_001008549	Zfp658	56.0018	6.3481	0.806948	7.8668	3.63825e-15	8.74331e-14
NM_001008700	Il4ra	239.55	3.65924	0.428728	8.53511	1.40026e-17	4.4679e-16
NM_001009927	Mief2	36.8926	5.30536	0.810192	6.54828	5.82045e-11	7.8231e-10
NM_001009949	Slc25a51	992.301	1.05326	0.289729	3.63533	0.000277627	0.00113808
NM_001010825	Ficd	88.0109	1.76889	0.447569	3.95222	7.7428e-05	0.000354637
NM_001010836	Ppp1r13l	281.24	1.47093	0.367756	3.99974	6.34121e-05	0.000296705
NM_001011818	Olfr316	44.6615	3.79755	0.734927	5.16725	2.37557e-07	1.77735e-06
NM_001012324	Ecm2	60.7747	4.72366	0.793048	5.95634	2.57954e-09	2.71504e-08
NM_001013019	Lrrn4cl	32.8756	2.06175	0.563452	3.65915	0.000253054	0.00104411
NM_001013028	Tmem263	813.62	2.04581	0.389554	5.25166	1.50734e-07	1.16566e-06
NM_001013370	Sesn1	12.5144	4.10198	1.02607	3.99777	6.3942e-05	0.000298831
NM_001013380	Dync1li2	681.678	1.07278	0.269663	3.97821	6.94358e-05	0.000321718
NM_001013381	Rsad1	17.4843	4.29374	0.896172	4.7912	1.65784e-06	1.06063e-05
NM_001013391	Cpsf6	496.646	1.0456	0.274949	3.80289	0.000143017	0.000620967
NM_001013756	Grhl3	502.543	9.74952	0.78917	12.3542	4.62603e-35	1.06455e-32
NM_001013786	Zscan26	248.705	1.22751	0.336586	3.64693	0.00026539	0.00108998
NM_001013811	Fam169b	54.9396	2.77978	0.66055	4.20828	2.57317e-05	0.00013141
NM_001013817	Sp140	98.8474	2.76398	0.4872	5.6732	1.40152e-08	1.29558e-07
NM_001014761	Scn2b	5.90002	4.20689	1.2307	3.4183	0.000630141	0.00235207
NM_001014981	Wdr7	1198.61	2.10051	0.277115	7.57992	3.4577e-14	7.26357e-13
NM_001015046	Rap1gap2	845.601	1.48825	0.28331	5.25306	1.4959e-07	1.1574e-06
NM_001017955	Zscan18	459.845	1.38872	0.258346	5.37542	7.64064e-08	6.25248e-07
NM_001017959	Lamp2	53.7244	2.61103	0.535013	4.88031	1.05922e-06	7.02199e-06
NM_001018013	Izumo1	49.6488	7.30358	1.01143	7.22105	5.15889e-13	9.27257e-12
NM_001024616	Rabl6	762.251	1.84135	0.302811	6.08084	1.19553e-09	1.33218e-08
NM_001024622	Pcnp	355.869	2.48555	0.316365	7.85659	3.94722e-15	9.42617e-14
NM_001024645	Lrrc16b	18.6795	3.58197	0.969677	3.69398	0.000220768	0.000920149
NM_001024707	Lrp3	22.9564	4.49442	0.907401	4.95307	7.305e-07	5.00218e-06
NM_001024728	C330021F23Rik	65.3051	2.41534	0.440772	5.47978	4.2585e-08	3.62749e-07
NM_001024850	Rhox10	120.489	3.78285	0.431556	8.76561	1.85769e-18	6.57764e-17
NM_001025192	Cxadr	717.412	2.97397	0.588765	5.05121	4.39023e-07	3.13046e-06
NM_001025245	Mbp	15.9183	4.46697	0.936786	4.7684	1.85695e-06	1.18055e-05
NM_001025296	Dffa	219.377	1.81615	0.476663	3.81013	0.000138895	0.000605269
NM_001025375	Wdr61	13.6869	3.68628	0.983366	3.74863	0.000177803	0.000756647
NM_001025431	Btbd3	9.75773	3.90393	1.04635	3.73101	0.00019071	0.000804936
NM_001025577	Maf	101.314	1.36	0.457879	2.97022	0.00297587	0.00926177
NM_001029876	Urb2	405.469	1.12232	0.368254	3.04769	0.0023061	0.00738926
NM_001029877	Nova2	12.9314	3.33842	0.972601	3.43247	0.000598116	0.00224634
NM_001029912	Zswim5	2450.86	1.59069	0.252916	6.28941	3.18682e-10	3.85055e-09
NM_001029935	Trim38	106.442	2.1984	0.415609	5.2896	1.22584e-07	9.61674e-07
NM_001029936	Specc1	319.938	4.11248	0.422566	9.73215	2.19892e-22	1.32005e-20
NM_001029983	Man1b1	107.176	3.15906	0.455352	6.93761	3.98796e-12	6.34233e-11
NM_001029988	Fat2	26.577	2.70769	0.667629	4.05568	4.99876e-05	0.000240029
NM_001031664	Nudt10	32.7665	2.93482	0.610816	4.80474	1.54949e-06	9.9719e-06
NM_001033135	Rnf149	667.999	3.53718	0.541194	6.53588	6.3235e-11	8.46178e-10
NM_001033136	Rmdn3	551.759	1.87451	0.379977	4.93322	8.08844e-07	5.48915e-06
NM_001033150	Plekhm2	80.8192	1.92514	0.41889	4.5958	4.31086e-06	2.55157e-05
NM_001033155	Dnajb14	92.1531	1.92064	0.389518	4.93082	8.18843e-07	5.54928e-06
NM_001033162	Shcbp1l	121.036	1.37356	0.340952	4.02861	5.6108e-05	0.000266189
NM_001033165	Dnajc25	131.532	1.25874	0.366153	3.43775	0.000586567	0.00220952
NM_001033171	Klrg2	50.8531	4.75643	0.768275	6.19105	5.9765e-10	6.93969e-09
NM_001033175	Cln6	236.024	3.23692	0.473433	6.83712	8.07983e-12	1.22757e-10
NM_001033189	C77080	50.1734	6.69418	0.886829	7.54845	4.40476e-14	9.1268e-13
NM_001033201	Ncbp1	329.067	3.1396	0.386449	8.12424	4.50166e-16	1.18906e-14
NM_001033207	Nlrc5	7.11316	4.2687	1.23565	3.45463	0.000551055	0.00209027
NM_001033219	Slc45a4	99.1482	2.13995	0.488195	4.3834	1.16843e-05	6.3812e-05
NM_001033228	Itga1	19.0663	2.95211	0.755156	3.90928	9.25728e-05	0.000417209
NM_001033231	Fam195b	111.913	5.08981	0.619585	8.21486	2.12413e-16	5.86568e-15
NM_001033238	Cblb	349.745	1.31463	0.325708	4.03622	5.43199e-05	0.000258867
NM_001033268	Fam120a	2869.95	1.77263	0.279833	6.3346	2.37955e-10	2.91927e-09
NM_001033271	Tmem55b	410.356	2.17611	0.359438	6.05418	1.41133e-09	1.5578e-08
NM_001033273	5031439G07Rik	750.576	1.19086	0.252581	4.71476	2.41996e-06	1.50942e-05
NM_001033298	Kiz	321.087	1.71924	0.373576	4.60212	4.1821e-06	2.48116e-05
NM_001033302	Ciart	104.225	1.59389	0.41143	3.87402	0.000107056	0.000476405
NM_001033311	Vsig10	7.98395	4.50009	1.2171	3.69739	0.000217825	0.000908631
NM_001033312	Fbxl18	149.931	1.41209	0.475392	2.97037	0.00297441	0.00925914
NM_001033322	Gucy1a2	67.8085	2.00882	0.527271	3.80984	0.000139057	0.000605676
NM_001033324	Zbtb16	89.8948	3.59636	0.448607	8.01672	1.08606e-15	2.74459e-14
NM_001033338	Rimbp3	35.6301	3.36674	0.790579	4.25858	2.05728e-05	0.00010719
NM_001033342	Cdc42bpg	125.979	2.23517	0.435548	5.13184	2.86916e-07	2.11641e-06
NM_001033347	D430041D05Rik	6.26108	4.23578	1.23288	3.43569	0.000591042	0.00222362
NM_001033348	Ralgapa2	454.855	1.29713	0.274451	4.72629	2.28655e-06	1.43091e-05
NM_001033350	Bank1	542.885	1.09388	0.324865	3.36718	0.000759419	0.00277662
NM_001033379	Dcp1b	120.719	2.04834	0.396002	5.17254	2.30935e-07	1.73207e-06
NM_001033420	Dock1	632.944	1.96652	0.271989	7.23013	4.82525e-13	8.74534e-12
NM_001033444	Capn13	26.9645	4.7574	0.813447	5.84844	4.96199e-09	4.95156e-08
NM_001033446	Arl14epl	3091.86	2.29694	0.391011	5.87436	4.24475e-09	4.29223e-08
NM_001033448	Ap5b1	35.958	3.54645	0.847012	4.18702	2.82647e-05	0.000143047
NM_001033463	Tatdn2	352.834	1.39857	0.261457	5.34915	8.837e-08	7.13917e-07
NM_001033472	A830080D01Rik	491.494	2.2111	0.412683	5.35785	8.42166e-08	6.83635e-07
NM_001033475	Tmed8	377.557	4.44892	0.328692	13.5352	9.68724e-42	3.58853e-39
NM_001033492	Mageb4	11.0604	5.16282	1.15777	4.4593	8.22287e-06	4.61868e-05
NM_001033496	Zfp213	49.0646	3.65508	0.696331	5.24906	1.52879e-07	1.18164e-06
NM_001033528	Usp36	1189.44	1.66617	0.335936	4.95977	7.05755e-07	4.85242e-06
NM_001033533	Ccdc102a	21.5378	2.66361	0.75016	3.55073	0.000384167	0.00151669
NM_001033540	Gm5113	34.0233	2.35707	0.656608	3.58976	0.000330981	0.00132742
NM_001033621	Myot	557.59	2.75964	0.396614	6.95799	3.45171e-12	5.55933e-11
NM_001033634	Zyg11b	1519.64	2.41978	0.35392	6.83708	8.08252e-12	1.22757e-10
NM_001033713	Mef2a	663.239	3.03791	0.370061	8.20921	2.22647e-16	6.12603e-15
NM_001033769	B020031M17Rik	27.54	3.85549	1.04079	3.70439	0.0002119	0.000884403
NM_001033813	Zfp872	4.56197	3.76019	1.26404	2.97474	0.00293239	0.00914895
NM_001034101	Gm13119	109.662	3.71591	1.2092	3.07304	0.0021189	0.00686825
NM_001034851	Fam134b	130.855	2.97873	0.48034	6.2013	5.59969e-10	6.52213e-09
NM_001034862	Erich1	188.218	2.40969	0.319908	7.53246	4.97935e-14	1.02475e-12
NM_001034866	Pnldc1	127.655	1.23766	0.34181	3.62089	0.000293591	0.00119418
NM_001034867	Pm20d2	99.3733	2.37051	0.582287	4.07103	4.68054e-05	0.000226323
NM_001037294	Alpk2	60.4745	1.86833	0.606763	3.07917	0.00207576	0.00675377
NM_001037717	Slc38a6	24.499	2.28876	0.686514	3.33388	0.000856421	0.00308669
NM_001037755	Baiap2	55.9771	2.66581	0.559509	4.76455	1.89273e-06	1.20028e-05
NM_001037877	Tcf25	225.405	1.21917	0.309872	3.93442	8.33991e-05	0.000380038
NM_001037955	Dusp22	41.0552	5.1053	0.731853	6.97585	3.04035e-12	4.92921e-11
NM_001038602	Marveld2	303.965	2.53375	0.426622	5.93911	2.86571e-09	2.99137e-08
NM_001038624	Ric3	404.647	1.51614	0.485299	3.12413	0.0017833	0.00590081
NM_001038643	Slco3a1	298.884	1.97773	0.339039	5.83335	5.4327e-09	5.37537e-08
NM_001038651	Zfp953	60.4903	1.59561	0.489474	3.25985	0.00111473	0.00388849
NM_001039088	Seh1l	1223.53	2.82575	0.309138	9.14074	6.20281e-20	2.66125e-18
NM_001039184	Cep350	3904.58	1.58766	0.235606	6.73863	1.59886e-11	2.32155e-10
NM_001039389	Wdr37	257.708	1.50626	0.408584	3.68654	0.000227321	0.000946164
NM_001039536	Pigl	436.811	1.60839	0.231367	6.9517	3.60911e-12	5.78829e-11
NM_001039648	Gm20767	99.2914	3.97687	1.12165	3.54554	0.000391807	0.00154485
NM_001039653	Lhx3	8.98877	4.75089	1.19651	3.97062	7.16859e-05	0.000331032
NM_001039677	Slc30a2	94.3488	2.82856	0.689332	4.10334	4.07233e-05	0.000199776
NM_001040026	Sco1	107.879	2.52275	0.412572	6.11468	9.67505e-10	1.0909e-08
NM_001040399	Larp1b	413.561	1.45047	0.303124	4.78506	1.70937e-06	1.09221e-05
NM_001040400	Tet2	910.141	2.0964	0.306762	6.83395	8.26087e-12	1.25216e-10
NM_001040695	Uevld	641.741	2.1763	0.398476	5.46157	4.71936e-08	3.97326e-07
NM_001042407	Pex10	23.7994	4.81077	0.922421	5.21537	1.83449e-07	1.40166e-06
NM_001042421	Kntc1	2820.56	0.851412	0.243235	3.50036	0.000464623	0.00179926
NM_001042503	Trim71	2806.26	1.1424	0.386147	2.95847	0.00309171	0.00957913
NM_001042591	Arrdc3	234.447	1.99672	0.37298	5.35342	8.6305e-08	6.9872e-07
NM_001042592	Arrdc4	74.5241	3.04192	0.55826	5.44894	5.06722e-08	4.25434e-07
NM_001042653	Oip5	83.0132	2.42766	0.496199	4.89251	9.95569e-07	6.63189e-06
NM_001042655	Tbc1d17	27.05	3.03711	0.749754	4.05081	5.10396e-05	0.000244539
NM_001042660	Smad7	57.405	4.32467	0.590303	7.32618	2.36807e-13	4.51271e-12
NM_001045486	Zfp180	140.65	1.69625	0.327092	5.18587	2.15014e-07	1.6255e-06
NM_001045514	Akna	168.218	1.15555	0.390963	2.95565	0.0031201	0.00965725
NM_001045531	Spata22	15.1947	2.58945	0.819637	3.15926	0.00158169	0.00530655
NM_001045536	Zzef1	666.678	1.61139	0.269979	5.96857	2.39345e-09	2.53498e-08
NM_001047604	Ttc21b	43.2754	2.46535	0.551174	4.47291	7.71632e-06	4.35347e-05
NM_001048167	Map6	23.9302	6.21757	1.08751	5.71724	1.08266e-08	1.01943e-07
NM_001048179	Ccl27a	115.017	2.55666	0.37517	6.81466	9.4484e-12	1.42082e-10
NM_001048208	Med14	778.118	3.38799	0.478764	7.07654	1.47798e-12	2.53932e-11
NM_001077425	Cntnap5a	38.6704	2.49232	0.531164	4.69218	2.7031e-06	1.67093e-05
NM_001077633	Dcpp3	238.568	4.25498	0.345978	12.2984	9.2391e-35	2.00462e-32
NM_001078167	Srsf1	35.946	1.78063	0.592438	3.00559	0.00265064	0.00834882
NM_001079686	Syne1	140.211	1.62358	0.374406	4.33641	1.44826e-05	7.77001e-05
NM_001079695	Srsf5	396.052	0.893725	0.270204	3.3076	0.000940997	0.00335726
NM_001080749	Gtf2i	8.09332	3.91064	1.09994	3.55533	0.0003775	0.00149348
NM_001080769	Uhrf1bp1	1989.85	1.25523	0.326224	3.84774	0.000119213	0.00052573
NM_001080780	Ret	10.736	5.16506	1.15519	4.47116	7.77957e-06	4.3859e-05
NM_001080798	Aff1	41.7006	1.79615	0.539558	3.32892	0.000871832	0.00313257
NM_001080808	Ccdc64	77.7957	1.71788	0.501211	3.42745	0.000609271	0.00228371
NM_001080813	Rab11fip1	165.547	2.60573	0.356973	7.29953	2.88781e-13	5.42151e-12
NM_001080924	Znrf3	701.333	1.87909	0.437747	4.29264	1.7656e-05	9.31434e-05
NM_001080940	Gm6484	18.3263	3.70502	0.911656	4.06406	4.82266e-05	0.000232381
NM_001080977	Rsbn1l	451.312	0.958032	0.324892	2.94877	0.0031904	0.00984073
NM_001081013	Rlf	1066.93	0.952007	0.309389	3.07705	0.00209059	0.0067924
NM_001081025	Maats1	22.863	5.86144	1.13242	5.17601	2.26676e-07	1.70518e-06
NM_001081028	Sipa1l3	4436.89	1.57458	0.239248	6.58137	4.66135e-11	6.34947e-10
NM_001081054	Qrsl1	114.49	2.68391	0.416292	6.44718	1.13947e-10	1.46045e-09
NM_001081056	Xpot	952.867	5.39817	0.491372	10.9859	4.4675e-28	5.06361e-26
NM_001081065	Zfp707	252.023	2.83345	0.479408	5.91032	3.41448e-09	3.52064e-08
NM_001081081	Gls	245.63	1.76882	0.417077	4.24099	2.22539e-05	0.000115081
NM_001081090	Esf1	1562.22	2.76986	0.284636	9.73122	2.21911e-22	1.32692e-20
NM_001081096	Saxo1	696.552	3.01692	0.439877	6.85855	6.95616e-12	1.0661e-10
NM_001081097	Grik3	165.695	4.19842	0.529531	7.92857	2.21689e-15	5.43945e-14
NM_001081098	Zfp362	178.593	3.26213	0.382168	8.53584	1.3914e-17	4.44896e-16
NM_001081099	Aunip	764.903	2.0066	0.284936	7.04229	1.89104e-12	3.18415e-11
NM_001081104	Chrna9	14.4915	3.74795	0.885893	4.23071	2.32957e-05	0.000120059
NM_001081114	Clip3	258.353	2.62439	0.365428	7.1817	6.8852e-13	1.21596e-11
NM_001081116	Arhgef17	215.378	1.7788	0.409965	4.3389	1.43197e-05	7.6987e-05
NM_001081118	Phrf1	590.09	1.15596	0.284756	4.05948	4.91822e-05	0.000236461
NM_001081120	Fam89a	12.825	3.08342	0.959513	3.21352	0.00131118	0.00449227
NM_001081124	Map7d2	1158.25	4.74931	0.282279	16.8248	1.6047e-63	3.48174e-60
NM_001081125	Gli2	1156.64	1.60389	0.319463	5.02059	5.1512e-07	3.64458e-06
NM_001081133	Kif16b	1919.85	1.15878	0.24684	4.69449	2.67279e-06	1.65354e-05
NM_001081135	Prrg3	490.791	4.61679	0.361305	12.7781	2.17368e-37	6.00253e-35
NM_001081141	Gabbr2	5.19397	4.10377	1.23529	3.32211	0.000893386	0.00320093
NM_001081147	Oxtr	29.5924	3.13691	1.0146	3.09178	0.00198958	0.00649985
NM_001081151	Gan	168.49	1.79798	0.574523	3.12952	0.00175092	0.00580634
NM_001081156	Trnp1	124.673	3.20916	0.557808	5.75316	8.7591e-09	8.4145e-08
NM_001081161	Fam171a1	176.075	3.08611	0.340406	9.06597	1.23506e-19	5.09729e-18
NM_001081166	Phf21b	66.5446	3.19402	0.547543	5.83336	5.43228e-09	5.37537e-08
NM_001081172	Frmpd1	1425.59	1.93905	0.365088	5.31117	1.08921e-07	8.65666e-07
NM_001081176	Polr3g	452.036	3.46029	0.392783	8.80966	1.2553e-18	4.52864e-17
NM_001081181	9430016H08Rik	49.1138	2.57055	0.765172	3.35944	0.000781012	0.00284461
NM_001081182	Atp8b2	28.6845	4.53731	0.973131	4.66259	3.12256e-06	1.91078e-05
NM_001081192	Hcn4	30.6365	5.95832	0.931279	6.398	1.57426e-10	1.97765e-09
NM_001081193	Lemd3	182.639	3.91725	0.468163	8.36727	5.89667e-17	1.74578e-15
NM_001081203	Sbno1	3506.67	1.78538	0.228557	7.81152	5.65033e-15	1.32619e-13
NM_001081204	B3glct	402.907	2.801	0.404978	6.91643	4.63159e-12	7.28959e-11
NM_001081210	Mrpl44	324.023	0.763446	0.257562	2.96413	0.00303543	0.00942398
NM_001081212	Irs2	125.234	6.33477	0.671811	9.4294	4.12459e-21	2.0472e-19
NM_001081214	Pprc1	1088.08	1.5827	0.246885	6.41066	1.44889e-10	1.83841e-09
NM_001081218	Hcfc2	164.89	1.42369	0.35973	3.95765	7.56896e-05	0.000347198
NM_001081232	D5Ertd579e	2683.55	1.27282	0.420551	3.02655	0.00247364	0.00787459
NM_001081237	Klhl42	500.976	1.07497	0.352028	3.05365	0.00226076	0.00727003
NM_001081240	Prmt10	202.225	3.70459	0.389204	9.51837	1.75915e-21	9.14999e-20
NM_001081242	Tln2	767.733	2.00044	0.473428	4.22545	2.38468e-05	0.000122567
NM_001081243	Filip1	28.7409	4.56573	0.88292	5.17117	2.32634e-07	1.74395e-06
NM_001081257	Hpse2	113.814	5.00886	0.532042	9.4144	4.75799e-21	2.34624e-19
NM_001081259	Mfsd7b	105.443	3.92437	0.516259	7.60155	2.92601e-14	6.20673e-13
NM_001081264	Alg6	45.454	4.75538	0.778713	6.10673	1.01695e-09	1.14326e-08
NM_001081269	Whsc1l1	423.883	1.76953	0.250911	7.05243	1.75824e-12	2.98037e-11
NM_001081274	Pgd	732.269	2.22911	0.378052	5.8963	3.71745e-09	3.79695e-08
NM_001081280	Nlrc3	4.85907	3.95683	1.24801	3.17051	0.00152171	0.00512456
NM_001081287	Mpp7	54.5122	2.12178	0.466748	4.54588	5.47058e-06	3.17006e-05
NM_001081289	Fam217b	38.5642	2.27545	0.540049	4.21342	2.51528e-05	0.000128713
NM_001081291	Ccdc88b	5.03884	3.86181	1.25847	3.06865	0.0021503	0.00696199
NM_001081295	Arhgef26	765.95	2.85979	0.4023	7.10861	1.17218e-12	2.02538e-11
NM_001081317		29.6086	2.23127	0.620673	3.59492	0.000324494	0.00130347
NM_001081321	Pds5a	2493.54	1.94152	0.29784	6.51868	7.09308e-11	9.4087e-10
NM_001081329	Zkscan2	38.6781	6.95363	1.03262	6.73394	1.65126e-11	2.39535e-10
NM_001081335	Cul9	66.434	1.95925	0.445503	4.39785	1.0933e-05	6.00762e-05
NM_001081345	Chd2	484.919	2.09469	0.287259	7.29199	3.05418e-13	5.71971e-12
NM_001081357		442.734	2.32142	0.330639	7.02102	2.20257e-12	3.66122e-11
NM_001081362	Trrap	3551.41	1.20489	0.218348	5.51819	3.425e-08	2.96573e-07
NM_001081365	Cystm1	9.0535	3.30886	0.970715	3.40868	0.000652783	0.0024223
NM_001081366		891.766	1.0259	0.266884	3.84401	0.000121041	0.000533015
NM_001081379	Ankrd11	1417.3	2.56861	0.262865	9.77158	1.49105e-22	9.2812e-21
NM_001081382	Zfp777	368.054	1.28971	0.340839	3.78394	0.000154365	0.000663598
NM_001081392	Mdn1	3042.58	4.1132	0.36446	11.2858	1.54303e-29	1.96938e-27
NM_001081395	Amotl1	830.734	1.73997	0.327899	5.30642	1.11799e-07	8.86226e-07
NM_001081396	Tbc1d31	135.019	3.59452	0.451567	7.9601	1.71901e-15	4.27304e-14
NM_001081399	Prss33	19.9662	5.17409	1.06076	4.87772	1.07316e-06	7.09587e-06
NM_001081412	Bcr	1269.12	0.719413	0.207207	3.47196	0.000516682	0.00197966
NM_001081420	Fam206a	933.954	1.22525	0.265534	4.61428	3.94454e-06	2.35309e-05
NM_001081421	Galnt16	427.929	2.84544	0.327369	8.69185	3.56581e-18	1.21932e-16
NM_001081473	Zxdb	132.643	1.68218	0.491241	3.42435	0.000616266	0.00230653
NM_001081549	Rcan1	65.8523	1.65696	0.422087	3.92564	8.64993e-05	0.000392751
NM_001081642	Xlr4a	196.448	2.28647	0.325662	7.02097	2.20329e-12	3.66122e-11
NM_001081655	Dact3	462.881	1.68774	0.245031	6.88789	5.66272e-12	8.81203e-11
NM_001081656	Neurl1b	127.222	3.58991	0.613432	5.85217	4.8519e-09	4.85445e-08
NM_001081668	Nup62cl	6.99049	3.62479	1.14287	3.17164	0.00151578	0.00510686
NM_001081678	Zfp800	344.724	2.79978	0.505541	5.53819	3.05607e-08	2.67708e-07
NM_001081954	Dux	6.35333	4.21751	1.23568	3.41311	0.000642268	0.00238853
NM_001081963	9430020K01Rik	935.567	3.01265	0.266198	11.3173	1.07688e-29	1.39792e-27
NM_001082483	Efr3b	811.475	1.08322	0.285013	3.8006	0.000144348	0.000625493
NM_001082536	Mkl1	183.861	1.42699	0.434224	3.28629	0.00101516	0.00358982
NM_001082975	Sdr39u1	53.6872	4.75707	0.632601	7.51985	5.48393e-14	1.12251e-12
NM_001083906	Nr3c2	25.2412	5.26812	0.877357	6.00453	1.91889e-09	2.07284e-08
NM_001083945	Rsph3b	193.349	1.17712	0.316743	3.71633	0.000202134	0.0008482
NM_001085378	Myh7b	21.9419	3.01758	0.788659	3.82621	0.000130131	0.00056974
NM_001085390	Dusp5	23.4842	5.26358	1.03006	5.10996	3.22235e-07	2.35294e-06
NM_001085421	Tspyl5	46.6024	2.33174	0.586464	3.97593	7.01039e-05	0.000324418
NM_001085492	Rere	4565.34	1.27089	0.269588	4.71421	2.42652e-06	1.51289e-05
NM_001085500	Cisd3	74.2234	3.36365	0.474668	7.08634	1.37707e-12	2.37131e-11
NM_001085541	Gm13128	37.9193	2.6238	0.781757	3.35628	0.000789979	0.00287313
NM_001099624	Rapgef2	3378.49	1.54394	0.342386	4.50937	6.50212e-06	3.72096e-05
NM_001099633	Dnah9	1030.86	0.893515	0.214611	4.16343	3.13509e-05	0.000156992
NM_001100460	Zbtb42	8.08372	3.90983	1.1002	3.55374	0.000379791	0.00150098
NM_001100591	Rc3h2	784.14	2.17489	0.394445	5.51381	3.51141e-08	3.03536e-07
NM_001101433	Zcchc24	177.921	2.37205	0.353268	6.71459	1.88601e-11	2.71514e-10
NM_001101443	Prrt4	10.3127	3.84213	1.16538	3.2969	0.000977578	0.0034739
NM_001101478	D3Ertd254e	6.87097	4.31776	1.22769	3.51699	0.000436477	0.00170242
NM_001102455	Aplp2	241.74	1.17119	0.396283	2.95543	0.0031223	0.00966207
NM_001102563	Prrt2	12.5971	3.78416	0.996377	3.79792	0.000145916	0.000630849
NM_001103168	Zglp1	71.7091	2.78891	0.537958	5.18425	2.16882e-07	1.63718e-06
NM_001103182	Lin9	419	1.27417	0.357186	3.56724	0.000360757	0.00143434
NM_001105245	Pcdh19	15.9287	3.14601	0.870948	3.61217	0.000303644	0.00123079
NM_001109661	Bach2	751.013	0.981921	0.326235	3.00985	0.00261373	0.00825478
NM_001109914	Apold1	10.5257	4.5345	1.23033	3.68561	0.000228155	0.000949376
NM_001110101	Lsm2	171.25	2.06053	0.399257	5.1609	2.4576e-07	1.8324e-06
NM_001110218	Ppm1h	3179.3	0.961114	0.253685	3.78862	0.000151487	0.000652704
NM_001111145	Ubap1l	175.746	8.85338	0.9467	9.35183	8.61411e-21	4.11419e-19
NM_001112705	Tlk2	439.678	1.00014	0.308382	3.24318	0.00118205	0.00409324
NM_001113204	Ncam1	10.6449	5.10157	1.16437	4.38138	1.17928e-05	6.43119e-05
NM_001113384	Gnao1	77.2188	2.64328	0.515047	5.13212	2.86498e-07	2.11435e-06
NM_001113412	Fggy	10.7877	2.73686	0.916341	2.98672	0.00281986	0.00882688
NM_001113550	4833420G17Rik	363.608	0.943638	0.275742	3.42218	0.000621217	0.00232302
NM_001113562	Cutc	15.9772	2.84903	0.845082	3.3713	0.000748138	0.00273998
NM_001114088	Pdlim7	160.34	1.30122	0.33844	3.84475	0.000120677	0.000531567
NM_001114119	Qrich1	11.0822	2.80818	0.889294	3.15777	0.00158982	0.00532793
NM_001122603	Fcgbp	80.3193	4.06262	0.522585	7.77408	7.60001e-15	1.76767e-13
NM_001122730	Tnrc18	133.972	2.05382	0.383744	5.35205	8.69638e-08	7.03679e-07
NM_001122899	Lepr	92.0177	2.38864	0.493402	4.84116	1.29082e-06	8.4359e-06
NM_001122997	Dnmt3b	25.1415	2.03794	0.677368	3.00862	0.00262439	0.00828158
NM_001127340	Acrbp	4.2356	3.80124	1.25632	3.0257	0.00248057	0.00788837
NM_001134399	Megf11	26.5137	3.16121	0.636332	4.96786	6.76958e-07	4.6671e-06
NM_001134480	Plcxd2	190.144	1.92579	0.44632	4.31482	1.5973e-05	8.49432e-05
NM_001134692	Ost4	250.599	0.923524	0.274359	3.36612	0.000762342	0.00278529
NM_001134752	Gm16532	9.56954	3.44295	1.00353	3.43085	0.000601689	0.00225864
NM_001135559	Sos2	1724.65	1.15677	0.310103	3.73027	0.000191278	0.000806982
NM_001135577	Smim13	364.587	3.11983	0.324047	9.62769	6.10855e-22	3.37369e-20
NM_001142642	Fbrsl1	132.212	2.35983	0.418539	5.63827	1.71768e-08	1.56217e-07
NM_001142938	AK010878	72.4959	2.12566	0.53977	3.93808	8.21351e-05	0.00037484
NM_001143765	Syce1	207.874	3.05612	0.345844	8.83669	9.8596e-19	3.63465e-17
NM_001145859	Sh3bp2	17.3727	2.3622	0.730205	3.23498	0.00121651	0.00419918
NM_001145875	Adtrp	111.063	1.69214	0.436122	3.87996	0.000104473	0.000466276
NM_001146007	Trim12c	15.1144	4.38466	0.992295	4.41871	9.92919e-06	5.51186e-05
NM_001146022	Wdfy4	170.188	1.82497	0.310614	5.87536	4.2192e-09	4.26924e-08
NM_001146043	Gfm2	7.214	3.73233	1.11623	3.34368	0.000826761	0.00299044
NM_001146161	Slc11a2	2082.16	1.33358	0.31726	4.20342	2.62911e-05	0.000133951
NM_001146287	Cables1	8.93283	3.6042	1.0629	3.39091	0.000696601	0.00256608
NM_001146328		104.461	4.40274	0.557811	7.89289	2.95266e-15	7.14093e-14
NM_001146349	Rnf217	62.0338	3.98284	0.557975	7.13802	9.46847e-13	1.65106e-11
NM_001159275	Slc25a2	4.04123	3.72588	1.26151	2.95352	0.00314173	0.00970835
NM_001159344	Casz1	76.1296	1.85895	0.458647	4.05312	5.0538e-05	0.000242365
NM_001159382	Gjc1	5.7183	4.25124	1.22381	3.47378	0.000513185	0.00196874
NM_001159553	H13	157.313	1.71943	0.352888	4.87245	1.10223e-06	7.27221e-06
NM_001159618	Pigp	91.3007	1.58422	0.485416	3.26364	0.00109991	0.00384386
NM_001159850	Kcnk2	11.1547	5.20355	1.15423	4.50825	6.5366e-06	3.73646e-05
NM_001159907	Gm17296	504.689	1.40973	0.277804	5.07453	3.88447e-07	2.79698e-06
NM_001160319	Ubr4	6306.62	1.09223	0.208243	5.24499	1.56291e-07	1.20617e-06
NM_001160356	Uqcc3	21.9428	5.884	1.12505	5.22997	1.69539e-07	1.30246e-06
NM_001161362	Ppp2r3a	124.812	1.88106	0.487904	3.8554	0.000115542	0.000510577
NM_001161458	Cbfb	36.8728	2.29422	0.646831	3.54687	0.00038984	0.00153789
NM_001161816	Gm15455	39.0569	2.58322	0.716021	3.60774	0.000308876	0.00124766
NM_001161845	Sgk1	216.636	1.07131	0.323233	3.31437	0.000918507	0.00328087
NM_001161855	4933416C03Rik	25.3382	2.63894	0.658156	4.00961	6.08203e-05	0.000286164
NM_001162489	Mroh1	9.64145	3.18786	0.990594	3.21813	0.00129029	0.00443169
NM_001162903	Ccdc71l	183.555	2.464	0.412681	5.9707	2.36235e-09	2.50729e-08
NM_001162906	2410089E03Rik	1950.19	1.122	0.275208	4.0769	4.56392e-05	0.000221318
NM_001162933	Rpl10l	119.353	3.45246	0.43652	7.90906	2.59348e-15	6.30235e-14
NM_001162945	Mtx3	272.04	1.8981	0.429587	4.41842	9.94265e-06	5.51329e-05
NM_001162989	Phax	162.083	1.46186	0.473402	3.08798	0.00201519	0.00657643
NM_001162999	Fnip2	2516.29	2.01969	0.254071	7.94932	1.87544e-15	4.63158e-14
NM_001163175	Begain	52.4536	7.28995	1.02	7.147	8.86972e-13	1.552e-11
NM_001163189	Enthd1	23.2982	2.56378	0.772536	3.31865	0.000904536	0.0032363
NM_001163445	Smim10l1	31.9887	4.50205	0.786343	5.7253	1.03251e-08	9.77059e-08
NM_001163449	Mapk8ip3	59.7426	1.64858	0.49725	3.31541	0.000915101	0.00327025
NM_001163475	Zfp746	283.659	1.94996	0.355961	5.47802	4.3012e-08	3.65771e-07
NM_001163567	Fam102b	388.59	2.93897	0.389661	7.54237	4.61496e-14	9.53632e-13
NM_001163572	Tmem170b	299.071	4.21564	0.507923	8.29976	1.04318e-16	2.99504e-15
NM_001163610	Nhsl2	243.418	6.99688	0.540796	12.9381	2.74264e-38	8.16767e-36
NM_001163627	Fam151b	13.1453	3.47092	0.969963	3.57841	0.000345692	0.00138058
NM_001163635	Tnks2	3839.49	1.32487	0.300348	4.41112	1.02835e-05	5.68571e-05
NM_001163774	Taok2	37.5452	3.76505	0.697564	5.39742	6.76052e-08	5.58037e-07
NM_001164100	Add3	45.0151	1.65929	0.516158	3.2147	0.00130583	0.00447697
NM_001164225	Fbxl16	30.5319	4.47248	0.806446	5.54591	2.92429e-08	2.56877e-07
NM_001164503	Akap11	3559.19	1.09232	0.33467	3.26386	0.00109904	0.00384171
NM_001164528	Ildr2	14.943	3.486	1.13288	3.07712	0.00209011	0.0067924
NM_001164598	Irf2bp2	7455.8	3.23676	0.345971	9.3556	8.31304e-21	4.0082e-19
NM_001164663	Soga1	135.852	3.69788	0.611675	6.0455	1.48949e-09	1.63811e-08
NM_001164725	Fcrl6	5.10942	3.8245	1.26403	3.02563	0.00248113	0.0078885
NM_001164791	Zak	1668.33	1.32957	0.283598	4.68822	2.75593e-06	1.70151e-05
NM_001164806	Bend4	385.586	4.29746	0.330585	12.9996	1.23059e-38	3.81432e-36
NM_001166064	Syde2	446.269	3.55265	0.448554	7.92024	2.37052e-15	5.78834e-14
NM_001166370	Trmt112	162.143	1.31113	0.327424	4.00438	6.21812e-05	0.000291664
NM_001166552	Zbed6	147.361	3.27208	0.571141	5.72902	1.01013e-08	9.57671e-08
NM_001166553	Rnf145	16.2073	4.13875	0.964363	4.29169	1.77317e-05	9.34778e-05
NM_001166581	BC005561	606.686	1.70921	0.309295	5.52614	3.27353e-08	2.85246e-07
NM_001166644	Zfp651	116.975	3.93024	0.618742	6.35199	2.12543e-10	2.62875e-09
NM_001166705	1700101E01Rik	21.6817	2.00986	0.677279	2.96754	0.00300191	0.00933326
NM_001167879	Gareml	22.3859	4.08554	0.853833	4.78494	1.71036e-06	1.09239e-05
NM_001167883	Ankrd50	530.77	0.830388	0.263626	3.14987	0.00163343	0.00545962
NM_001167889	Suv420h1	59.8213	3.1129	0.470062	6.62232	3.53599e-11	4.89559e-10
NM_001167918	D830031N03Rik	489.148	3.03491	0.291683	10.4048	2.35768e-25	1.9675e-23
NM_001167923	Col6a5	2438.7	1.73091	0.245879	7.03968	1.92676e-12	3.24071e-11
NM_001167936	Zyg11a	67.3835	3.07062	0.526694	5.82999	5.54318e-09	5.47398e-08
NM_001167996	1110032F04Rik	53.6217	5.15592	0.688075	7.49326	6.71852e-14	1.36236e-12
NM_001168288	Arhgap39	21.4812	2.2001	0.741345	2.96771	0.00300023	0.00933021
NM_001168507	Tmem11	14.0611	3.23093	0.859107	3.7608	0.000169369	0.000722986
NM_001168658	Ccdc127	106.789	1.80945	0.529669	3.41619	0.000635036	0.00236685
NM_001170913	Trim66	6.18386	4.20493	1.23374	3.40829	0.000653725	0.0024252
NM_001170935	Lppr3	76.8655	2.58285	0.553827	4.66365	3.10652e-06	1.90249e-05
NM_001172146	Aimp2	137.166	2.41972	0.375803	6.4388	1.20424e-10	1.53957e-09
NM_001174099	Krt36	16.4626	2.5622	0.78095	3.28088	0.00103484	0.00365007
NM_001177365	Gm9112	5.47699	4.08397	1.241	3.29087	0.000998775	0.00353929
NM_001177399	Etohi1	59.0906	2.36705	0.584086	4.05258	5.06568e-05	0.000242782
NM_001177412	Usp35	109.863	2.44719	0.597491	4.09578	4.20752e-05	0.000205809
NM_001177482	Gm14851	6.87956	4.44215	1.21403	3.65901	0.00025319	0.00104411
NM_001177648	Fnbp1	17.247	3.64055	0.870754	4.18092	2.90336e-05	0.000146305
NM_001185040	Gm5885	4.63008	3.92202	1.24812	3.14235	0.00167597	0.00558339
NM_001190373	Kcng2	12.0838	4.05042	1.02196	3.96337	7.38983e-05	0.000340111
NM_001190414	Gne	6.297	3.51422	1.14599	3.06653	0.00216562	0.00700414
NM_001191044	Ddx43	31.2816	3.12926	0.73757	4.24266	2.20886e-05	0.000114265
NM_001195255	Gfy	135.537	3.49122	0.586437	5.95326	2.62848e-09	2.7589e-08
NM_001195258	Tgfbr3l	12.2433	4.54433	1.096	4.14628	3.37913e-05	0.000167994
NM_001195298	Kifc1	624.129	1.13781	0.362996	3.13449	0.00172153	0.00572262
NM_001195681	Gm684	5.73966	4.14678	1.23598	3.35506	0.000793467	0.00288375
NM_001197024	Unkl	53.7045	2.77764	0.639832	4.34121	1.41703e-05	7.62648e-05
NM_001198789	Ccpg1os	64.9151	1.5561	0.456829	3.40631	0.000658467	0.00243981
NM_001198911	Arhgef2	25.6466	6.43273	1.06166	6.05911	1.36879e-09	1.51857e-08
NM_001198914	Myb	20.3963	5.99199	1.10251	5.43485	5.48428e-08	4.57917e-07
NM_001198987	Gm15097	21.7992	3.42678	0.864307	3.96478	7.34641e-05	0.000338318
NM_001200002	Tmppe	518.174	2.81332	0.317294	8.8666	7.5412e-19	2.84208e-17
NM_001204875	Set	64.6333	1.56635	0.493244	3.17561	0.00149519	0.00504869
NM_001204915	Reep3	8.57521	4.82733	1.18114	4.08701	4.36977e-05	0.000212582
NM_001204916	H60c	80.0412	2.99575	0.585597	5.11572	3.12541e-07	2.28875e-06
NM_001214911	Fignl2	35.3448	3.09506	0.76563	4.0425	5.28846e-05	0.000252741
NM_001243046	Dlg2	59.0172	1.79097	0.504288	3.55149	0.000383055	0.0015127
NM_001243769	Cdc42	167.415	1.10042	0.32441	3.39208	0.000693643	0.00255718
NM_001252201	Map4k4	159.174	1.50086	0.356274	4.21265	2.52394e-05	0.000129113
NM_001254744	E030030I06Rik	10.7042	5.03399	1.17382	4.28856	1.79835e-05	9.46408e-05
NM_001254951	Zfp850	92.5382	1.94244	0.454212	4.2765	1.89853e-05	9.94651e-05
NM_001256263	3110082J24Rik	11.87	5.25408	1.15248	4.55892	5.14177e-06	2.99552e-05
NM_001256493	2210404O09Rik	12.0125	5.19303	1.16243	4.46739	7.91786e-06	4.46055e-05
NM_001256521	C330006A16Rik	37.9948	2.64669	0.607921	4.35367	1.33875e-05	7.2205e-05
NM_001267622	Ttc28	730.082	0.74896	0.251527	2.97765	0.00290466	0.00906989
NM_001271599	Sort1	49.7311	1.69311	0.462855	3.65797	0.000254222	0.00104774
NM_007381	Acadl	162.499	2.8814	0.40062	7.19235	6.36868e-13	1.13132e-11
NM_007390	Chrna7	44.3681	2.68628	0.589944	4.55344	5.27749e-06	3.06518e-05
NM_007393	Actb	4973.42	2.90058	0.2082	13.9317	4.0666e-44	1.93011e-41
NM_007396	Acvr2a	1108.62	1.26206	0.361389	3.49225	0.000478969	0.00184916
NM_007414	Adprh	685.339	0.935567	0.281265	3.32628	0.00088013	0.0031594
NM_007415	Parp1	2086.91	1.38314	0.246877	5.60253	2.11246e-08	1.89771e-07
NM_007418	Adra2c	30.3613	3.89077	0.853074	4.56088	5.09386e-06	2.96989e-05
NM_007450	Slc25a4	842.005	0.966002	0.236999	4.07597	4.5823e-05	0.000222068
NM_007453	Prdx6	141.203	1.40557	0.448691	3.13261	0.00173262	0.00575319
NM_007459	Ap2a2	472.122	1.87221	0.257293	7.27658	3.42385e-13	6.34938e-12
NM_007465	Birc2	360.243	1.94051	0.278319	6.97225	3.11922e-12	5.04523e-11
NM_007467	Aplp1	23.7958	3.62959	0.821804	4.41661	1.00261e-05	5.55549e-05
NM_007477	Arf2	753.415	2.93804	0.440142	6.67522	2.46866e-11	3.47166e-10
NM_007479	Arf4	731.029	2.50148	0.418463	5.97778	2.26206e-09	2.40421e-08
NM_007488	Arnt2	23.5714	2.57552	0.861454	2.98974	0.00279218	0.00874745
NM_007498	Atf3	906.968	5.88435	0.334389	17.5973	2.58348e-69	9.80947e-66
NM_007499	Atm	1582.69	1.13428	0.315367	3.59669	0.000322297	0.00129574
NM_007504	Atp2a1	8.95507	3.65807	1.17728	3.10722	0.00188857	0.00621718
NM_007511	Atp7b	40.924	4.24572	0.689341	6.1591	7.31581e-10	8.39853e-09
NM_007513	Slc7a1	2830.36	1.70292	0.241181	7.06075	1.65611e-12	2.81353e-11
NM_007515	Slc7a3	110.926	8.29858	0.96705	8.58134	9.37768e-18	3.0762e-16
NM_007517	Aup1	70.5228	1.3926	0.456848	3.04827	0.00230165	0.00737653
NM_007520	Bach1	482.472	1.66493	0.361739	4.60257	4.17318e-06	2.47837e-05
NM_007545	Hrk	123.366	4.8426	1.12906	4.28908	1.79418e-05	9.45197e-05
NM_007569	Btg1	455.72	1.36136	0.295048	4.61402	3.94945e-06	2.3551e-05
NM_007598	Cap1	676.866	1.92314	0.364709	5.27307	1.34158e-07	1.04761e-06
NM_007602	Capn5	402.294	2.3893	0.321644	7.42838	1.09933e-13	2.18256e-12
NM_007611	Casp7	125.377	4.10961	0.505349	8.13222	4.21503e-16	1.12115e-14
NM_007624	Cbx3	113.263	3.4425	0.455957	7.55005	4.35081e-14	9.02735e-13
NM_007625	Cbx4	268.874	5.78344	0.494721	11.6903	1.42868e-31	2.12733e-29
NM_007633	Ccne1	145.5	3.65012	0.45678	7.99099	1.33862e-15	3.37164e-14
NM_007636	Cct2	3661.62	0.594771	0.200723	2.96314	0.00304519	0.00945233
NM_007644	Scarb2	93.4201	1.56532	0.456909	3.42588	0.000612807	0.00229565
NM_007669	Cdkn1a	34.3706	5.03638	0.77892	6.46585	1.00734e-10	1.29766e-09
NM_007676	Psg16	168.469	2.38149	0.327902	7.26282	3.79103e-13	7.00465e-12
NM_007690	Chd1	2345.16	1.29082	0.28438	4.53907	5.65019e-06	3.26666e-05
NM_007692	Chkb	125.646	3.72181	0.477748	7.79032	6.68388e-15	1.55937e-13
NM_007697	Chl1	139.262	5.5031	1.09993	5.00314	5.64032e-07	3.94952e-06
NM_007709	Cited1	37.5928	2.11213	0.608767	3.46952	0.000521389	0.00199518
NM_007714	Clk4	426.157	1.49356	0.365772	4.0833	4.44004e-05	0.000215655
NM_007726	Cnr1	21.932	5.57813	0.970498	5.7477	9.04678e-09	8.65255e-08
NM_007729	Col11a1	12.5838	3.66033	1.15883	3.15863	0.00158511	0.00531683
NM_007730		73.2692	2.95463	0.869833	3.39678	0.000681828	0.00251777
NM_007738	Col7a1	19.0429	3.21137	0.734229	4.3738	1.221e-05	6.6387e-05
NM_007739	Col8a1	6.2868	4.02782	1.25327	3.21384	0.00130973	0.00448931
NM_007746	Map3k8	25.0661	2.63465	0.691747	3.8087	0.000139701	0.000608308
NM_007761	Crcp	479.894	2.18886	0.327612	6.68125	2.36913e-11	3.35344e-10
NM_007762	Crhr1	123.622	6.91487	0.774504	8.92813	4.3329e-19	1.6745e-17
NM_007791	Csrp1	1118.59	2.26223	0.426069	5.30953	1.09906e-07	8.72129e-07
NM_007792	Csrp2	33.6944	2.29249	0.591345	3.87674	0.000105865	0.000471655
NM_007793	Cstb	116.103	1.59418	0.439422	3.6279	0.000285732	0.0011669
NM_007798	Ctsb	1078.42	1.50881	0.267299	5.64465	1.65513e-08	1.5098e-07
NM_007799	Ctse	9.86559	3.93715	1.03605	3.80014	0.000144614	0.000626467
NM_007803	Cttn	25.1915	3.53203	0.70849	4.98529	6.18681e-07	4.29851e-06
NM_007805	Cyb561	134.375	1.36303	0.421935	3.23043	0.00123603	0.00426074
NM_007815	Cyp2c29	410.634	1.45502	0.307373	4.73371	2.20449e-06	1.38412e-05
NM_007832	Dck	332.688	4.76274	0.47043	10.1242	4.31368e-24	3.09039e-22
NM_007839	Dhx15	205.948	1.12324	0.301805	3.72172	0.000197869	0.000832243
NM_007842	Dhx9	978.194	0.843967	0.252325	3.34477	0.000823521	0.00298085
NM_007854	Slc29a2	214.343	1.65296	0.35343	4.67692	2.91219e-06	1.78998e-05
NM_007859	Dffb	44.8607	3.42752	0.587807	5.83103	5.50866e-09	5.44343e-08
NM_007874	Reep5	2323.5	1.65416	0.209399	7.89957	2.79864e-15	6.79006e-14
NM_007877	Drd3	115.57	3.77364	0.460725	8.19066	2.59795e-16	7.0586e-15
NM_007883	Dsg2	38.9686	3.78044	0.764066	4.94779	7.50605e-07	5.12368e-06
NM_007907	Eef2	6230.48	1.21475	0.348708	3.48358	0.000494752	0.0019038
NM_007910	Efna4	915.436	1.99146	0.347496	5.73089	9.99072e-09	9.4837e-08
NM_007918	Eif4ebp1	307.517	5.32203	0.479377	11.102	1.22709e-28	1.46749e-26
NM_007930	Enc1	288.894	4.13423	0.345519	11.9653	5.40025e-33	9.32034e-31
NM_007939	Epha8	15.6732	4.51548	1.10688	4.07947	4.51389e-05	0.000218962
NM_007949	Ercc2	87.2935	1.72112	0.488296	3.52476	0.000423872	0.00165898
NM_007961	Etv6	229.492	1.31206	0.336068	3.90417	9.45506e-05	0.000425114
NM_007988	Fasn	628.124	1.54305	0.391399	3.94241	8.06671e-05	0.000368584
NM_007991	Fbl	77.4125	1.91586	0.470216	4.07442	4.61289e-05	0.000223336
NM_007998	Fech	486.539	1.1339	0.305985	3.70575	0.000210767	0.000880158
NM_008004	Fgf17	19.2927	3.68177	0.898257	4.09879	4.15317e-05	0.000203676
NM_008014	Ppm1g	865.487	1.97258	0.368196	5.35742	8.44172e-08	6.84771e-07
NM_008017	Smc2	2976.02	1.39211	0.322746	4.31333	1.6081e-05	8.54579e-05
NM_008029	Flt4	21.0317	4.9543	1.07972	4.58849	4.46459e-06	2.63845e-05
NM_008031	Fmr1	1832.15	1.46557	0.284422	5.15278	2.56658e-07	1.90804e-06
NM_008037	Fosl2	516.862	3.34481	0.575257	5.81446	6.08297e-09	5.97981e-08
NM_008058	Fzd8	71.2436	1.51588	0.505895	2.99643	0.00273163	0.00857899
NM_008064	Gaa	39.6971	2.02529	0.59118	3.42584	0.00061291	0.00229565
NM_008065	Gabpa	1074.44	3.463	0.371166	9.33005	1.05821e-20	4.94528e-19
NM_008067	Gabra3	716.158	1.26271	0.383568	3.29201	0.000994744	0.00352665
NM_008074	Gabrg3	96.3964	2.70828	0.546256	4.9579	7.12576e-07	4.89711e-06
NM_008081	B4galnt2	599.944	2.58401	0.350411	7.37424	1.65289e-13	3.21848e-12
NM_008086	Gas1	11.5403	5.2275	1.15282	4.53454	5.77279e-06	3.3312e-05
NM_008087	Gas2	35.389	1.80814	0.567356	3.18696	0.00143778	0.00488086
NM_008090	Gata2	55.7217	1.96877	0.519011	3.79332	0.000148647	0.000641926
NM_008122	Gjc1	10.0675	5.0699	1.16208	4.36279	1.28413e-05	6.94814e-05
NM_008131	Glul	790.42	2.27331	0.258026	8.81039	1.24713e-18	4.50985e-17
NM_008149	Gpam	149.557	3.88998	0.45954	8.46493	2.56302e-17	7.91203e-16
NM_008156	Gpld1	349.025	1.12661	0.296026	3.80577	0.000141363	0.000614489
NM_008160	Gpx1	377.192	2.17936	0.348683	6.25028	4.09728e-10	4.86929e-09
NM_008163	Grb2	448.303	1.07104	0.276977	3.8669	0.000110228	0.000488942
NM_008168	Grik5	38.1884	2.04262	0.59071	3.4579	0.000544406	0.00207039
NM_008170	Grin2a	45.5357	5.82718	0.790971	7.36712	1.74352e-13	3.38627e-12
NM_008176	Cxcl1	6.3975	4.31222	1.22463	3.52123	0.000429547	0.0016797
NM_008187	Cfap20	241.531	1.61209	0.281926	5.71814	1.07697e-08	1.0147e-07
NM_008212	Hadh	130.992	2.70369	0.415903	6.50076	7.99126e-11	1.04902e-09
NM_008214	Hars	339.678	1.46662	0.306755	4.78109	1.74344e-06	1.11211e-05
NM_008222	Hccs	657.734	2.92364	0.428368	6.82507	8.78823e-12	1.3268e-10
NM_008226	Hcn2	14.1733	3.93328	0.931169	4.22403	2.39976e-05	0.0001233
NM_008228	Hdac1	202.77	3.431	0.402543	8.5233	1.55066e-17	4.93739e-16
NM_008232	Hdgfl1	17.0481	2.75643	0.877171	3.14241	0.00167562	0.00558339
NM_008235	Hes1	211.531	6.52669	0.502141	12.9977	1.26055e-38	3.82906e-36
NM_008237	Hes3	8.30906	3.26894	1.00985	3.23706	0.00120767	0.00417151
NM_008248	Hint1	2180.92	0.928629	0.266668	3.48234	0.000497057	0.0019117
NM_008253	Hmgb3	1037.7	1.02926	0.208135	4.94517	7.60779e-07	5.18847e-06
NM_008254	Hmgcl	52.7861	2.51369	0.512171	4.90791	9.20513e-07	6.17524e-06
NM_008259	Foxa1	17.4064	3.78247	0.811329	4.66207	3.13038e-06	1.91402e-05
NM_008261	Hnf4a	22.0772	2.00911	0.657266	3.05678	0.00223731	0.00720684
NM_008297	Hsf2	854.512	2.67802	0.389264	6.8797	5.99788e-12	9.27656e-11
NM_008300	Hspa4	17247.6	0.936507	0.312085	3.00081	0.00269265	0.00846707
NM_008302	Hsp90ab1	20121.5	1.56088	0.279083	5.59288	2.2333e-08	1.99878e-07
NM_008304	Sdc2	379.481	1.66132	0.323039	5.14277	2.70716e-07	2.00454e-06
NM_008306	Ndst1	776.905	2.64026	0.264708	9.97423	1.97637e-23	1.31654e-21
NM_008321	Id3	171.311	3.68936	0.528736	6.97771	3.00039e-12	4.88424e-11
NM_008338	Ifngr2	82.9334	3.27369	0.511017	6.40623	1.49165e-10	1.89109e-09
NM_008343	Igfbp3	320.602	6.2051	0.497131	12.4818	9.38179e-36	2.29824e-33
NM_008364	Il1rap	193.755	2.78175	0.546901	5.08639	3.64945e-07	2.63691e-06
NM_008378	Impact	352.958	2.15686	0.316415	6.81656	9.32485e-12	1.40363e-10
NM_008382	Inhbe	125.69	7.16799	0.701135	10.2234	1.55768e-24	1.17701e-22
NM_008402	Itgav	372.443	2.55623	0.349942	7.30472	2.77851e-13	5.23574e-12
NM_008404	Itgb2	76.2246	1.95404	0.549711	3.55468	0.000378445	0.00149605
NM_008410	Itm2b	1342.96	0.805208	0.263319	3.05792	0.0022288	0.00718552
NM_008411	Cuzd1	13.3922	4.33334	1.01744	4.25906	2.05285e-05	0.00010707
NM_008416	Junb	69.939	2.64274	0.894587	2.95415	0.00313531	0.00969445
NM_008420	Kcnb1	12.0555	3.68978	0.961632	3.837	0.000124548	0.000547347
NM_008421	Kcnc1	21.6336	5.55024	0.973426	5.70176	1.18579e-08	1.1083e-07
NM_008422	Kcnc3	79.6484	1.55839	0.515499	3.02306	0.0025023	0.00794418
NM_008430	Kcnk1	494.739	3.22474	0.352567	9.14646	5.88273e-20	2.53108e-18
NM_008432	Kcnu1	5.07265	4.02878	1.24243	3.24268	0.00118413	0.0040995
NM_008443	Kif3a	3537.42	1.44394	0.22701	6.36068	2.00868e-10	2.49655e-09
NM_008453	Klf3	192.38	3.10051	0.50979	6.08194	1.18734e-09	1.32403e-08
NM_008465	Kpna1	224.328	4.15679	0.469566	8.8524	8.56565e-19	3.1886e-17
NM_008467	Kpna4	729.242	3.49752	0.501129	6.97928	2.96706e-12	4.84035e-11
NM_008478	L1cam	20.5115	3.84624	0.858436	4.48052	7.44605e-06	4.21194e-05
NM_008484	Lamb3	10.443	5.06146	1.16718	4.3365	1.44771e-05	7.77001e-05
NM_008520	Ltbp3	140.838	2.28081	0.560648	4.06816	4.73855e-05	0.000228836
NM_008532	Epcam	269.283	4.92115	0.385505	12.7654	2.55706e-37	6.93511e-35
NM_008537	Amacr	155.761	1.96103	0.610457	3.2124	0.0013163	0.00450777
NM_008551	Mapkapk2	235.383	2.26863	0.455699	4.97835	6.41271e-07	4.43784e-06
NM_008554	Ascl2	374.107	5.2954	0.357174	14.8258	9.97374e-50	7.57406e-47
NM_008562	Mcl1	2091.98	2.43633	0.327089	7.44853	9.43857e-14	1.88374e-12
NM_008588	Mesp1	4.34239	3.83457	1.25404	3.05777	0.00222993	0.00718764
NM_008592	Foxc1	350.148	1.38373	0.425331	3.25331	0.0011407	0.00396996
NM_008598	Mgmt	84.0088	2.03026	0.435337	4.66365	3.10649e-06	1.90249e-05
NM_008606	Mmp11	37.7067	2.96491	0.730322	4.05973	4.91287e-05	0.000236278
NM_008609	Mmp15	88.1168	5.47944	0.603716	9.07619	1.12439e-19	4.66593e-18
NM_008613	Mns1	308.56	1.77366	0.360046	4.92621	8.38409e-07	5.66448e-06
NM_008622	Mpv17	124.866	4.01416	0.411517	9.75455	1.76381e-22	1.08019e-20
NM_008624	Mras	301.766	1.74872	0.268751	6.50684	7.67463e-11	1.01183e-09
NM_008626	Mrc2	23.0309	3.74437	0.946278	3.95694	7.59154e-05	0.000348129
NM_008627	Meis3	5.00921	4.05724	1.23809	3.277	0.00104916	0.00369371
NM_008630	Mt2	83.268	4.48304	0.59375	7.55039	4.3395e-14	9.01619e-13
NM_008646	Mug2	9.25435	4.72521	1.20027	3.93679	8.25783e-05	0.000376749
NM_008655	Gadd45b	68.4532	2.21867	0.650823	3.40902	0.000651976	0.0024199
NM_008681	Ndrg1	398.759	6.53672	0.444103	14.7189	4.87266e-49	3.36391e-46
NM_008688	Nfic	11.2572	5.04606	1.17576	4.29174	1.7728e-05	9.34778e-05
NM_008695	Nid2	42.9202	2.72871	0.753987	3.61905	0.00029569	0.00120175
NM_008708	Nmt2	623.019	2.08714	0.268245	7.78072	7.21137e-15	1.67985e-13
NM_008712	Nos1	2850.74	1.13933	0.275582	4.13428	3.56065e-05	0.000176556
NM_008716	Notch3	6.40792	4.06357	1.25124	3.24764	0.00116367	0.00403925
NM_008729	Ctnnd2	361.833	1.60463	0.386588	4.15075	3.31387e-05	0.000165074
NM_008730	Nptx1	6.18905	4.26124	1.22783	3.47054	0.000519416	0.00198913
NM_008748	Dusp8	120.05	5.71527	0.66126	8.643	5.47567e-18	1.85222e-16
NM_008756	Ocln	164.218	1.54643	0.377396	4.09763	4.17409e-05	0.000204438
NM_008760	Ogn	44.8813	4.4241	0.954919	4.63296	3.60472e-06	2.16997e-05
NM_008774	Pabpc1	4793.55	2.93442	0.26559	11.0487	2.22462e-28	2.59904e-26
NM_008775	Pafah1b2	1661.54	2.00261	0.318705	6.28357	3.30888e-10	3.99168e-09
NM_008788	Pcolce	15.6865	3.31893	1.05507	3.1457	0.00165692	0.00552599
NM_008792	Pcsk2	6.38254	3.58124	1.18411	3.0244	0.00249127	0.00791411
NM_008796	Pctp	145.484	3.4135	0.449311	7.5972	3.02613e-14	6.39233e-13
NM_008808	Pdgfa	227.035	1.94436	0.477316	4.07354	4.63042e-05	0.000224113
NM_008812	Padi2	131.563	1.39814	0.392475	3.56236	0.00036753	0.00145784
NM_008817	Peg3	3252.59	1.7435	0.249303	6.99351	2.68094e-12	4.39246e-11
NM_008819	Pemt	66.9673	1.55578	0.45348	3.43076	0.000601893	0.00225885
NM_008820	Pepd	74.3501	3.04138	0.701543	4.33527	1.45581e-05	7.80749e-05
NM_008823	Cfp	16.0625	3.14832	0.87572	3.59512	0.000324239	0.00130279
NM_008824	Pfkfb1	104.626	2.03403	0.430247	4.72759	2.27201e-06	1.4224e-05
NM_008825	Pfkfb2	207.921	1.90153	0.333796	5.69668	1.22161e-08	1.13897e-07
NM_008832	Phka1	14.5405	4.33092	0.945567	4.58024	4.64443e-06	2.73579e-05
NM_008841	Pik3r2	56.8321	1.82193	0.554777	3.28407	0.00102321	0.00361491
NM_008845	Pip4k2a	792.787	1.51218	0.348568	4.33827	1.43609e-05	7.71808e-05
NM_008846	Pip5k1b	74.7227	2.11506	0.61333	3.44848	0.000563753	0.00213204
NM_008847	Pip5k1a	402.932	2.49199	0.263442	9.45934	3.09879e-21	1.5636e-19
NM_008854	Prkaca	998.86	1.17297	0.29987	3.91159	9.16904e-05	0.000413929
NM_008861	Pkd2	198.969	2.81822	0.483101	5.83361	5.42405e-09	5.37537e-08
NM_008862	Pkia	44.2648	2.83456	0.684942	4.1384	3.49734e-05	0.00017353
NM_008881	Plxna1	4303.46	0.976571	0.301332	3.24085	0.00119176	0.00412404
NM_008898	Por	691.777	0.714059	0.233789	3.05429	0.00225592	0.00725754
NM_008908	Ppic	49.6678	3.97315	0.81427	4.8794	1.06408e-06	7.05117e-06
NM_008917	Ppt1	680.094	1.04066	0.22594	4.60591	4.10659e-06	2.44208e-05
NM_008928	Map2k3	68.5322	2.05957	0.527211	3.90655	9.36246e-05	0.0004217
NM_008942	Npepps	522.406	1.98946	0.351026	5.66755	1.44854e-08	1.3366e-07
NM_008957	Ptch1	363.469	4.00038	0.39616	10.0979	5.64462e-24	3.95071e-22
NM_008963	Ptgds	282.719	3.94203	0.490322	8.03968	9.00763e-16	2.29159e-14
NM_008972	Ptma	929.811	1.28267	0.26643	4.8143	1.47718e-06	9.54586e-06
NM_008973	Ptn	20.3675	2.47471	0.729395	3.39282	0.000691762	0.00255198
NM_008976	Ptpn14	368.369	1.65539	0.393354	4.20841	2.57176e-05	0.000131382
NM_008982	Ptprj	804.281	1.76459	0.396308	4.45257	8.48471e-06	4.75344e-05
NM_008988	Igdcc3	4.8494	3.83153	1.25957	3.04193	0.00235069	0.00751943
NM_008991	Abcd3	1778	2.63972	0.364319	7.24564	4.30405e-13	7.89861e-12
NM_008996	Rab1	3175.53	2.26153	0.339295	6.66538	2.63982e-11	3.70209e-10
NM_008997	Rab11b	1472.45	2.16432	0.332649	6.50632	7.70124e-11	1.01445e-09
NM_009013	Rad51ap1	163.071	1.78996	0.345871	5.17522	2.27639e-07	1.70988e-06
NM_009025	Rasa3	164.633	1.09645	0.368084	2.97881	0.00289367	0.00903929
NM_009026	Rasd1	19.6746	3.28571	0.864438	3.80098	0.000144122	0.000625052
NM_009030	Rbbp4	1380.17	0.885275	0.257779	3.43424	0.000594219	0.00223336
NM_009045	Rela	948.652	0.660191	0.216964	3.04287	0.00234337	0.00750076
NM_009057	Slc50a1	17.6628	2.20804	0.736133	2.99951	0.00270418	0.00849805
NM_009062	Rgs4	7.24801	3.93313	1.26869	3.10014	0.00193432	0.00633727
NM_009066	Ring1	68.7152	1.95104	0.573671	3.40098	0.00067145	0.00248368
NM_009073	Rom1	5.81656	4.26706	1.22305	3.48886	0.000485091	0.00186997
NM_009085	Polr1c	227.688	2.50207	0.49497	5.05499	4.30422e-07	3.07202e-06
NM_009089		2897.31	1.82271	0.293432	6.21169	5.24192e-10	6.15014e-09
NM_009091	Rps15	1331.95	1.52763	0.301971	5.05888	4.21729e-07	3.01422e-06
NM_009119	Sap18	288.687	2.66064	0.284916	9.33833	9.78688e-21	4.58775e-19
NM_009120	Sar1a	494.375	1.15843	0.258837	4.47552	7.62255e-06	4.30536e-05
NM_009126	Serpinb3a	88.8845	1.85706	0.539622	3.44141	0.00057869	0.00218201
NM_009129	Scg2	68.9993	2.03779	0.461568	4.41493	1.01042e-05	5.59269e-05
NM_009139	Ccl6	35.9499	2.75725	0.577978	4.7705	1.83768e-06	1.16928e-05
NM_009149	Glg1	1013.99	1.28017	0.254734	5.0255	5.02132e-07	3.56207e-06
NM_009163	Sgpl1	379.973	5.01531	0.544478	9.21122	3.22451e-20	1.44041e-18
NM_009171	Shmt1	49.8103	3.28347	0.557278	5.89197	3.81617e-09	3.89254e-08
NM_009178	St3gal4	32.2917	3.17548	0.726655	4.36999	1.24251e-05	6.74215e-05
NM_009179	St3gal2	160.722	2.1242	0.43514	4.88165	1.05204e-06	6.98358e-06
NM_009185	Stil	711.784	1.15046	0.356434	3.22771	0.00124787	0.00429862
NM_009194	Slc12a2	2249.3	1.4393	0.293551	4.90308	9.43447e-07	6.31793e-06
NM_009201	Slc1a5	61.9385	6.13756	0.749712	8.18655	2.68815e-16	7.29064e-15
NM_009211	Smarcc1	2429.01	2.03368	0.260753	7.79926	6.227e-15	1.45501e-13
NM_009212	Ighmbp2	202.026	1.23756	0.356271	3.47366	0.000513412	0.00196912
NM_009223	Snn	13.0017	3.9875	1.01668	3.92209	8.77836e-05	0.000397987
NM_009225	Snrpb	168.666	3.29332	0.408159	8.06871	7.10474e-16	1.82897e-14
NM_009228	Snta1	40.5215	1.8515	0.61613	3.00504	0.00265543	0.00835869
NM_009231	Sos1	1279.75	2.17822	0.363112	5.99874	1.98854e-09	2.13895e-08
NM_009236	Sox18	11.335	4.53923	1.23378	3.67913	0.000234034	0.000971973
NM_009270	Sqle	1160.76	1.55849	0.273235	5.70385	1.17132e-08	1.0968e-07
NM_009282	Stag1	1998.84	0.903191	0.258006	3.50066	0.000464116	0.00179867
NM_009285	Stc1	181.141	2.59689	0.480551	5.40399	6.51739e-08	5.38847e-07
NM_009287	Stim1	150.961	2.88468	0.417748	6.9053	5.00968e-12	7.85212e-11
NM_009299	Sva	39.692	4.55629	0.742959	6.13262	8.64413e-10	9.80486e-09
NM_009302	Swap70	932.582	1.02865	0.270235	3.80651	0.00014094	0.000613177
NM_009305	Syp	21.6361	2.94207	0.820652	3.58503	0.000337036	0.00134886
NM_009322	Tbr1	10.8802	3.3693	1.03796	3.24608	0.00117004	0.00405814
NM_009324	Tbx2	18.4934	3.75507	0.873022	4.30124	1.69848e-05	8.98834e-05
NM_009327	Hnf1a	13.2894	2.43314	0.806869	3.01554	0.00256524	0.00811686
NM_009338	Acat2	190.203	2.32712	0.379506	6.13197	8.67975e-10	9.82664e-09
NM_009360	Tfam	1319.09	1.53858	0.280923	5.47689	4.32864e-08	3.67487e-07
NM_009366	Tsc22d1	47.4156	2.91363	0.606226	4.80618	1.53844e-06	9.9092e-06
NM_009369	Tgfbi	38.4269	4.39869	0.744178	5.91081	3.40438e-09	3.51501e-08
NM_009370	Tgfbr1	2732.12	1.86545	0.323031	5.77482	7.70363e-09	7.42874e-08
NM_009373	Tgm2	24.4454	3.41829	1.02389	3.33855	0.000842177	0.00304185
NM_009391	Ran	1122.51	2.35166	0.301057	7.81134	5.65822e-15	1.32619e-13
NM_009402	Pglyrp1	32.4929	5.07882	0.79906	6.356	2.07077e-10	2.56951e-09
NM_009404	Tnfsf9	8.71535	4.17089	1.25609	3.32054	0.000898449	0.0032168
NM_009409	Top2b	843.404	1.04222	0.293363	3.55267	0.000381337	0.00150631
NM_009419	Tpst2	100.79	2.71465	0.508488	5.33866	9.36345e-08	7.54441e-07
NM_009422	Traf2	80.2019	4.09932	0.566003	7.24258	4.40231e-13	8.06542e-12
NM_009424	Traf6	177.301	1.34572	0.37975	3.54371	0.00039454	0.00155522
NM_009425	Tnfsf10	392.754	2.74852	0.39916	6.88576	5.74786e-12	8.92623e-11
NM_009431	Ctr9	766.406	0.815816	0.220146	3.7058	0.000210726	0.000880158
NM_009437	Tst	18.73	3.32593	1.03997	3.1981	0.00138339	0.00471307
NM_009441	Ttc3	1267.61	1.18461	0.318598	3.71819	0.000200657	0.000842571
NM_009442	Ttf1	178.048	2.56319	0.452337	5.66656	1.45697e-08	1.34274e-07
NM_009443	Tgoln1	1875.77	2.05538	0.27773	7.40066	1.35512e-13	2.65225e-12
NM_009456	Ube2l3	784.951	2.08213	0.251508	8.27858	1.24653e-16	3.53876e-15
NM_009466	Ugdh	235.944	2.16832	0.449113	4.82801	1.37906e-06	8.98092e-06
NM_009469	Ulk1	2454.15	1.0958	0.272538	4.02074	5.80156e-05	0.000274157
NM_009471	Umps	576.471	0.94484	0.291777	3.23823	0.00120274	0.00415635
NM_009479	Uros	98.1693	1.41473	0.360493	3.92443	8.69349e-05	0.000394493
NM_009497	Vamp2	131.691	4.67058	0.481889	9.69225	3.25283e-22	1.88565e-20
NM_009498	Vamp3	2396.68	2.48353	0.277768	8.94101	3.85642e-19	1.50183e-17
NM_009502	Vcl	1814.2	1.03483	0.306374	3.37767	0.00073102	0.00268441
NM_009503	Vcp	1849.78	0.885491	0.228313	3.87841	0.000105143	0.00046899
NM_009504	Vdr	10.9812	4.4564	1.09603	4.06595	4.78381e-05	0.000230802
NM_009507	Vhl	182.611	4.48122	0.442316	10.1313	4.01415e-24	2.88942e-22
NM_009510	Ezr	309.578	2.18478	0.294322	7.42311	1.14406e-13	2.26249e-12
NM_009516	Wee1	1690.35	2.0054	0.314322	6.38007	1.77006e-10	2.2163e-09
NM_009517	Zmat3	1096.66	2.07547	0.420575	4.93484	8.02184e-07	5.44883e-06
NM_009531	Xpc	990.901	0.944569	0.280549	3.36685	0.000760314	0.00277855
NM_009537	Yy1	875.627	2.87835	0.31435	9.15651	5.36014e-20	2.31937e-18
NM_009543	Rnf103	205.583	1.78643	0.383718	4.65558	3.23067e-06	1.96584e-05
NM_009546	Trim25	225.548	4.59873	0.543187	8.46621	2.53499e-17	7.84143e-16
NM_009553	Zscan2	99.318	2.71201	0.621844	4.36124	1.29327e-05	6.99507e-05
NM_009564	Zfp64	53.5784	4.12976	0.632182	6.53255	6.4661e-11	8.64499e-10
NM_009602	Chrnb2	59.2872	3.83789	0.704452	5.44805	5.09254e-08	4.27323e-07
NM_009610	Actg2	58.4365	3.25407	0.691333	4.70695	2.51449e-06	1.56453e-05
NM_009616	Adam19	288.936	5.86449	0.513287	11.4253	3.1241e-30	4.23651e-28
NM_009628	Adnp	575.292	2.72588	0.330712	8.24245	1.68714e-16	4.73646e-15
NM_009633	Adra2b	234.106	4.34539	0.462989	9.38553	6.26001e-21	3.04734e-19
NM_009634	Adsl	374.689	3.06867	0.360301	8.51696	1.63797e-17	5.20449e-16
NM_009642	Agtrap	242.702	2.23289	0.404619	5.5185	3.41901e-08	2.96223e-07
NM_009675	Aoc3	26.7528	4.19493	0.949985	4.41579	1.00644e-05	5.57266e-05
NM_009688	Xiap	1013.54	0.962173	0.311828	3.08559	0.00203148	0.00662389
NM_009702	Aqr	2653.92	1.65675	0.347243	4.77114	1.83184e-06	1.16605e-05
NM_009706	Arhgap5	475.71	1.47267	0.388276	3.79284	0.000148934	0.000642982
NM_009708	Rnd2	19.5283	3.74154	0.869781	4.3017	1.69494e-05	8.97585e-05
NM_009716	Atf4	6988.34	0.846341	0.256257	3.30271	0.000957551	0.00341151
NM_009725	Atp5f1	514.259	0.89909	0.244435	3.67824	0.000234852	0.000974572
NM_009740	Bcl10	266.731	1.68966	0.384594	4.39337	1.11606e-05	6.1172e-05
NM_009744	Bcl6	303.544	1.02742	0.26239	3.91561	9.01744e-05	0.000407731
NM_009752	Glb1	159.965	2.06822	0.345375	5.98833	2.12003e-09	2.26753e-08
NM_009769	Klf5	147.733	4.62764	0.563081	8.21843	2.06191e-16	5.71466e-15
NM_009778	C3	20.1032	4.29324	0.867119	4.95115	7.3775e-07	5.04728e-06
NM_009786	Cacybp	266.856	2.99334	0.318177	9.40779	5.06688e-21	2.48244e-19
NM_009804	Cat	232.354	3.4574	0.404551	8.54626	1.27142e-17	4.09117e-16
NM_009810	Casp3	132.835	1.92599	0.525301	3.66645	0.000245938	0.00101613
NM_009811	Casp6	58.3532	3.07733	0.57391	5.36204	8.22893e-08	6.69063e-07
NM_009817	Cast	807.332	1.46296	0.310266	4.71518	2.41491e-06	1.50751e-05
NM_009831	Ccng1	942.192	3.24194	0.30077	10.7788	4.33503e-27	4.3033e-25
NM_009837	Cct4	698.667	1.13053	0.316597	3.57089	0.000355769	0.00141525
NM_009846	Cd24a	53.6964	4.72637	0.620061	7.62243	2.48935e-14	5.37812e-13
NM_009871	Cdk5r1	76.5202	5.54523	0.668401	8.29626	1.07441e-16	3.07308e-15
NM_009875	Cdkn1b	643.975	1.0848	0.295603	3.66978	0.00024276	0.0010045
NM_009883	Cebpb	106.922	1.86092	0.559708	3.3248	0.000884805	0.00317318
NM_009895	Cish	20.6844	5.35474	0.980425	5.46165	4.71735e-08	3.97326e-07
NM_009899	Clca3a1	22.5986	3.63889	0.869998	4.18264	2.88141e-05	0.00014544
NM_009900	Clcn2	60.5913	2.48155	0.590796	4.20036	2.66492e-05	0.000135548
NM_009903	Cldn4	250.16	1.74604	0.40509	4.31026	1.63065e-05	8.6565e-05
NM_009926	Col11a2	14.6338	3.83386	0.986672	3.88565	0.000102057	0.000456298
NM_009928	Col15a1	9.57811	4.23184	1.25434	3.37376	0.000741481	0.00271888
NM_009938	Copa	4768.08	0.953372	0.279197	3.41469	0.000638543	0.00237701
NM_009950	Cradd	97.0638	3.1148	0.514258	6.05688	1.38789e-09	1.53639e-08
NM_009955	Dpysl2	105.221	2.52905	0.486432	5.19918	2.00167e-07	1.52083e-06
NM_009963	Cry2	89.5725	1.51117	0.511099	2.9567	0.0031095	0.00962638
NM_009976	Cst3	817.38	1.10231	0.254906	4.32437	1.52967e-05	8.16039e-05
NM_009983	Ctsd	3778.13	3.00089	0.278211	10.7864	3.9925e-27	4.05272e-25
NM_009984	Ctsl	680.102	3.20464	0.37075	8.64366	5.44397e-18	1.8456e-16
NM_009987	Cx3cr1	5.2025	4.03687	1.2429	3.24794	0.00116244	0.00403637
NM_009996	Cyp24a1	41.54	3.39211	0.551598	6.1496	7.76806e-10	8.87077e-09
NM_010010	Cyp46a1	130.27	2.22592	0.358355	6.21151	5.24795e-10	6.15014e-09
NM_010020	Slc6a3	19.7028	2.41375	0.727465	3.31803	0.000906532	0.00324268
NM_010052	Dlk1	5.38745	4.04398	1.24344	3.25225	0.00114496	0.00398206
NM_010065	Dnm1	14.4693	2.93955	0.953821	3.08187	0.00205703	0.00669858
NM_010072	Dpm1	116.82	2.31799	0.391274	5.92421	3.13806e-09	3.26221e-08
NM_010078	Drp2	49.939	3.54251	0.649333	5.45562	4.88032e-08	4.09969e-07
NM_010090	Dusp2	101.989	2.20044	0.526206	4.1817	2.89336e-05	0.000145898
NM_010093	E2f3	100.888	4.33266	0.579172	7.48079	7.38784e-14	1.49211e-12
NM_010106	Eef1a1	10993.9	0.999099	0.237091	4.21398	2.50905e-05	0.000128481
NM_010108	Efna3	30.0554	2.64671	0.668671	3.95816	7.55301e-05	0.000346676
NM_010118	Egr2	69.7789	3.33672	0.675739	4.93788	7.89753e-07	5.36919e-06
NM_010119	Ehd1	298.507	1.54344	0.451427	3.41902	0.000628479	0.00234875
NM_010120	Eif1a	558.447	2.5758	0.465199	5.53698	3.07725e-08	2.69069e-07
NM_010121	Eif2ak3	286.946	2.22217	0.35883	6.19282	5.90986e-10	6.86756e-09
NM_010123	Eif3a	6900.48	0.936511	0.231661	4.0426	5.28627e-05	0.000252716
NM_010124	Eif4ebp2	1251.85	1.72336	0.292516	5.89149	3.82725e-09	3.90123e-08
NM_010127	Pou6f1	13.2901	3.42062	0.945848	3.61646	0.000298662	0.00121221
NM_010137	Epas1	571.142	4.72575	0.401737	11.7633	6.03327e-32	9.25589e-30
NM_010139	Epha2	20.0969	3.45565	0.804233	4.29683	1.73261e-05	9.15938e-05
NM_010143	Ephb3	17.4294	3.72082	0.937665	3.96817	7.24265e-05	0.000333945
NM_010146	Epm2a	36.7972	4.58094	0.833296	5.49737	3.8549e-08	3.30781e-07
NM_010150	Nr2f6	18.2365	2.88757	0.811741	3.55725	0.000374757	0.00148418
NM_010155	Erf	194.483	2.34451	0.519932	4.50925	6.50561e-06	3.72155e-05
NM_010158	Khdrbs3	69.3752	1.98246	0.48076	4.12359	3.73012e-05	0.000184118
NM_010171	F3	10.7284	5.12423	1.16161	4.41133	1.02739e-05	5.68244e-05
NM_010180	Fbln1	51.2855	2.36749	0.621972	3.80642	0.000140992	0.000613226
NM_010200	Fgf13	22.0124	2.11225	0.678063	3.11513	0.00183863	0.00606804
NM_010213	Fhl3	50.1419	1.68653	0.561161	3.00544	0.00265201	0.00835123
NM_010218	Fjx1	101.454	4.15804	0.526942	7.89089	3.00048e-15	7.24503e-14
NM_010219	Fkbp4	1171.91	2.97223	0.427656	6.95005	3.65147e-12	5.84389e-11
NM_010240	Ftl1	972.859	2.36558	0.370014	6.39322	1.62433e-10	2.03887e-09
NM_010256	Gart	116.764	1.91126	0.378935	5.04376	4.56462e-07	3.25176e-06
NM_010271	Gpd1	29.3977	3.32064	0.661162	5.02244	5.10195e-07	3.61588e-06
NM_010273	Gdi1	862.17	1.29697	0.298621	4.34319	1.40426e-05	7.56042e-05
NM_010287	Gpr83	96.7376	3.81246	0.543497	7.01469	2.30467e-12	3.80884e-11
NM_010295	Gclc	783.926	1.61554	0.326795	4.94358	7.67008e-07	5.22391e-06
NM_010296	Gli1	50.1083	3.01105	0.52364	5.75022	8.91251e-09	8.53741e-08
NM_010297	Glra4	173.099	3.32703	0.412598	8.06361	7.40757e-16	1.89724e-14
NM_010299	Gm2a	124.185	2.02143	0.49222	4.10675	4.01257e-05	0.000197099
NM_010301	Gna11	1108	4.2274	0.336894	12.5482	4.06818e-36	1.02979e-33
NM_010308	Gnao1	126.746	2.85468	0.393233	7.25951	3.88496e-13	7.16078e-12
NM_010333	S1pr2	48.9556	1.9825	0.580469	3.41533	0.000637045	0.00237318
NM_010344	Gsr	399.379	3.28403	0.386728	8.49182	2.03432e-17	6.38372e-16
NM_010345	Grb10	205.855	1.80089	0.362471	4.96838	6.75133e-07	4.65664e-06
NM_010347	Aes	268.793	1.44361	0.308579	4.67825	2.8934e-06	1.78059e-05
NM_010357	Gsta4	3380.59	1.59682	0.217415	7.34458	2.06399e-13	3.97312e-12
NM_010362	Gsto1	53.9532	2.11166	0.449428	4.69856	2.62008e-06	1.62556e-05
NM_010364	Gtf2h4	58.4558	2.07162	0.692636	2.99092	0.00278138	0.0087154
NM_010368	Gusb	19.0757	3.46014	0.858026	4.03267	5.51456e-05	0.000262391
NM_010380	H2-D1	40.1707	4.87962	0.817893	5.96609	2.43009e-09	2.57021e-08
NM_010382	H2-Eb1	13.1186	3.21949	0.875259	3.67833	0.000234766	0.000974479
NM_010392	H2-Q2	9.25637	4.95485	1.17146	4.22966	2.34049e-05	0.000120539
NM_010419	Hes5	11.8457	3.2058	0.991916	3.23193	0.00122958	0.00424141
NM_010421	Hexa	56.5083	3.29341	0.779213	4.22658	2.37268e-05	0.000122033
NM_010422	Hexb	11.9806	3.43902	0.997625	3.44721	0.000566409	0.00213942
NM_010432	Hipk1	494.285	2.40414	0.384184	6.25776	3.90535e-10	4.67065e-09
NM_010442	Hmox1	340.11	4.37753	0.331348	13.2113	7.55334e-40	2.54933e-37
NM_010449	Hoxa1	56.4287	2.5589	0.525301	4.8713	1.10868e-06	7.31161e-06
NM_010452	Hoxa3	16.7069	3.05252	0.830075	3.6774	0.000235621	0.000977494
NM_010459	Hoxb4	52.8659	1.91425	0.490247	3.90467	9.43542e-05	0.000424608
NM_010464	Hoxc13	213.925	4.50409	0.386024	11.6679	1.85941e-31	2.68959e-29
NM_010467	Hoxd1	93.9341	4.4592	0.603273	7.39167	1.44991e-13	2.83049e-12
NM_010468	Hoxd3	5.47288	4.15359	1.23229	3.37062	0.00074998	0.00274541
NM_010469	Hoxd4	4.97932	3.96819	1.24817	3.17921	0.00147679	0.00499211
NM_010477	Hspd1	4680.71	0.891896	0.234183	3.80855	0.000139784	0.000608496
NM_010481	Hspa9	4928.33	0.901929	0.240036	3.75748	0.000171632	0.000731891
NM_010483	Htr5b	316.345	2.75582	0.46328	5.94849	2.70636e-09	2.83282e-08
NM_010485	Elavl1	1640.4	1.40624	0.407267	3.45286	0.000554675	0.0021019
NM_010496	Id2	228.105	5.74042	0.491386	11.6821	1.57382e-31	2.3207e-29
NM_010498	Ids	818.841	1.41796	0.365899	3.87527	0.000106505	0.000474092
NM_010499	Ier2	76.1104	4.30245	0.80892	5.31876	1.04476e-07	8.34709e-07
NM_010500	Ier5	14.7802	4.7652	1.08771	4.38093	1.18174e-05	6.44158e-05
NM_010511	Ifngr1	21.6544	5.44439	0.96655	5.6328	1.77303e-08	1.60961e-07
NM_010513	Igf1r	2104.49	1.22003	0.272661	4.47455	7.65717e-06	4.32331e-05
NM_010515	Igf2r	4747.83	0.95155	0.243317	3.91073	9.20167e-05	0.000415196
NM_010568	Insr	572.57	1.08415	0.227732	4.76064	1.92976e-06	1.22275e-05
NM_010570	Irs1	66.5052	3.54156	0.791288	4.47569	7.61644e-06	4.30352e-05
NM_010573	Irx1	115.827	3.16999	0.439144	7.21856	5.25394e-13	9.43225e-12
NM_010574	Irx2	72.8557	4.35552	0.509339	8.55132	1.21692e-17	3.92411e-16
NM_010576	Itga4	158.261	3.15441	0.41436	7.61273	2.68358e-14	5.76495e-13
NM_010578	Itgb1	1882	0.984585	0.265529	3.70802	0.000208888	0.000873029
NM_010592	Jund	60.6801	2.97865	0.657912	4.52743	5.97065e-06	3.43968e-05
NM_010593	Jup	903.837	1.53475	0.257066	5.97024	2.36904e-09	2.51088e-08
NM_010597	Kcnab1	91.9583	3.04974	0.618285	4.93257	8.11539e-07	5.50498e-06
NM_010617	Kif13a	487.35	1.39777	0.427565	3.26913	0.00107878	0.00378394
NM_010620	Kif15	619.989	2.33001	0.32742	7.11627	1.10888e-12	1.92038e-11
NM_010629	Kifap3	766.141	4.30525	0.313184	13.7467	5.3302e-43	2.18797e-40
NM_010630	Kifc2	30.6058	2.19426	0.66316	3.30879	0.000937006	0.00334459
NM_010637	Klf4	562.009	1.41693	0.416884	3.39886	0.000676664	0.00250053
NM_010638	Klf9	66.0797	2.10671	0.674148	3.125	0.00177803	0.00588722
NM_010658	Mafb	13.9223	4.94192	1.20416	4.10405	4.05974e-05	0.000199287
NM_010680	Lama3	152.585	1.86751	0.409917	4.55581	5.21833e-06	3.03314e-05
NM_010690	Lats1	1382.78	1.76679	0.336902	5.24422	1.56948e-07	1.21063e-06
NM_010706	Lgals4	4.72619	3.89311	1.25255	3.10814	0.00188267	0.00620261
NM_010721	Lmnb1	735.418	0.727154	0.230061	3.1607	0.00157392	0.00528398
NM_010722	Lmnb2	208.1	1.22225	0.332572	3.67514	0.000237717	0.000985385
NM_010731	Zbtb7a	526.082	2.91856	0.434895	6.71097	1.93338e-11	2.77806e-10
NM_010757	Mafk	153.861	1.97713	0.434336	4.55208	5.31183e-06	3.08277e-05
NM_010764	Man2b1	385.436	2.26903	0.339643	6.68062	2.37932e-11	3.36159e-10
NM_010768	Matk	12.5819	3.85551	1.04955	3.67349	0.000239259	0.000990695
NM_010772	Maz	97.5665	4.00366	0.561884	7.12542	1.03767e-12	1.80528e-11
NM_010807	Marcksl1	311.999	4.77988	0.423632	11.2831	1.59063e-29	2.00885e-27
NM_010813	Mnt	706.404	1.55992	0.290002	5.379	7.48988e-08	6.14567e-07
NM_010836	Msx3	18.9099	5.16639	1.00088	5.16182	2.44556e-07	1.82522e-06
NM_010847	Mxi1	10.7359	3.19109	0.928315	3.4375	0.000587101	0.00221043
NM_010879	Nck2	339.838	2.89895	0.492847	5.88205	4.05221e-09	4.11397e-08
NM_010889	Neb	8468.07	2.95706	0.285491	10.3578	3.85701e-25	3.09949e-23
NM_010890	Nedd4	2060.6	2.10339	0.377279	5.57517	2.47288e-08	2.20282e-07
NM_010893	Neu1	50.331	2.14683	0.504763	4.25314	2.10792e-05	0.000109528
NM_010896	Neurog1	14.5044	4.86126	1.01258	4.80087	1.57981e-06	1.01498e-05
NM_010900	Nfatc2ip	411.645	0.998369	0.23518	4.24513	2.18465e-05	0.000113167
NM_010901	Nfatc3	614.965	1.8758	0.355797	5.27211	1.34865e-07	1.05205e-06
NM_010904	Nefh	1605.86	2.34656	0.248304	9.45034	3.37725e-21	1.69847e-19
NM_010909	Nfkbil1	38.0437	2.85542	0.929178	3.07305	0.0021188	0.00686825
NM_010914	Nfyb	325.175	1.51528	0.464491	3.26224	0.00110537	0.00386029
NM_010918	Nktr	2672.11	1.07734	0.207795	5.18463	2.16444e-07	1.63468e-06
NM_010928	Notch2	595.752	1.21318	0.306951	3.95237	7.73807e-05	0.000354527
NM_010942	Nsg1	66.3881	1.67902	0.492859	3.40669	0.000657559	0.00243704
NM_010951	Gpr143	45.8913	3.44595	0.617195	5.58325	2.36061e-08	2.10652e-07
NM_011026	P2rx4	111.244	1.11817	0.379446	2.94684	0.00321043	0.00989849
NM_011029	Rpsa	820.575	1.23115	0.332328	3.70462	0.000211709	0.000883849
NM_011060	Padi3	35.5143	4.66389	0.765924	6.08924	1.13448e-09	1.26881e-08
NM_011066	Per2	100.85	2.81341	0.413941	6.79665	1.07077e-11	1.60224e-10
NM_011072	Pfn1	4537.14	1.07029	0.284691	3.75947	0.000170276	0.000726448
NM_011101	Prkca	160.405	3.4297	0.403763	8.49434	1.99062e-17	6.25955e-16
NM_011102	Prkcg	9.3764	3.63673	1.18804	3.06113	0.00220507	0.00711656
NM_011103	Prkcd	485.875	1.29984	0.354818	3.6634	0.000248894	0.00102751
NM_011131	Pold1	103.446	2.1184	0.372419	5.68822	1.28367e-08	1.19244e-07
NM_011136	Pou2af1	11.5025	3.08664	0.915187	3.37269	0.000744382	0.00272886
NM_011141	Pou3f1	19.2489	3.86047	0.900223	4.28834	1.80011e-05	9.47006e-05
NM_011150	Lgals3bp	35.4876	2.6758	0.869793	3.07636	0.00209543	0.00680321
NM_011155	Ppp5c	231.871	1.89627	0.33158	5.7189	1.07217e-08	1.01207e-07
NM_011159	Prkdc	1304.61	1.10619	0.282246	3.91924	8.88292e-05	0.000402248
NM_011170	Prnp	121.27	4.82526	0.622311	7.75377	8.92011e-15	2.05271e-13
NM_011196	Ptger3	72.2942	1.4751	0.449187	3.28392	0.00102373	0.0036159
NM_011197	Ptgfrn	2317.22	2.42731	0.347961	6.97582	3.041e-12	4.92921e-11
NM_011207	Ptpn3	361.606	1.59242	0.262841	6.05849	1.37403e-09	1.52324e-08
NM_011221	Purb	298.957	1.99059	0.484292	4.11032	3.95115e-05	0.000194283
NM_011224	Pygm	16.4928	5.76179	1.113	5.17682	2.25699e-07	1.69951e-06
NM_011237	Rad9a	191.474	3.00773	0.422907	7.11204	1.1434e-12	1.97789e-11
NM_011240	Ranbp2	3979.47	0.780655	0.248089	3.14668	0.00165138	0.00551112
NM_011247	Rbbp6	8757.32	3.32334	0.375734	8.84491	9.15997e-19	3.39321e-17
NM_011254	Rbp1	10.5095	4.62346	1.22079	3.78726	0.00015232	0.000655923
NM_011262	Dpf2	1686.79	3.01069	0.402845	7.47357	7.80455e-14	1.57418e-12
NM_011267	Rgs16	20.0893	3.53276	0.888419	3.97646	6.99494e-05	0.000323801
NM_011271	Rnase1	16.7784	3.11634	0.857298	3.63507	0.000277905	0.00113892
NM_011279	Rnf7	558.306	1.96564	0.302141	6.50571	7.73272e-11	1.01684e-09
NM_011281	Rorc	72.5328	7.65688	1.00687	7.60467	2.85634e-14	6.07593e-13
NM_011290	Rpl6	263.968	1.00233	0.309453	3.23904	0.00119934	0.00414554
NM_011291	Rpl7	559.669	0.908852	0.265713	3.42043	0.000625218	0.00233714
NM_011292	Rpl9	26.0102	4.12679	0.755534	5.46208	4.70578e-08	3.96622e-07
NM_011296	Rps18	367.684	1.26925	0.41653	3.0472	0.00230982	0.00739962
NM_011299	Rps6ka2	48.7775	1.94978	0.606733	3.21356	0.00131099	0.00449227
NM_011334	Clcn4-2	65.2576	2.17763	0.503014	4.32915	1.49683e-05	8.00206e-05
NM_011352	Sema7a	26.1142	2.36915	0.684243	3.46244	0.000535306	0.00204123
NM_011353	Serf1	109.627	2.08032	0.429049	4.84868	1.24288e-06	8.14011e-06
NM_011354	Serf2	893.89	1.83585	0.332867	5.51528	3.48218e-08	3.01181e-07
NM_011361	Sgk1	21.4672	6.0783	1.09535	5.54921	2.86961e-08	2.52512e-07
NM_011382	Six4	18.0832	3.83662	0.956741	4.01009	6.06945e-05	0.000285749
NM_011383	Six5	49.268	3.56566	0.693012	5.14517	2.67281e-07	1.98022e-06
NM_011394	Slc20a2	899.766	1.56232	0.28877	5.41026	6.29329e-08	5.21454e-07
NM_011398	Slc25a14	62.4277	1.45747	0.445288	3.27309	0.00106377	0.0037408
NM_011404	Slc7a5	1967.49	1.63445	0.265789	6.14941	7.77717e-10	8.87451e-09
NM_011408	Slfn2	8.42984	3.67066	1.07428	3.41685	0.000633491	0.00236226
NM_011412	Slit3	100.5	1.81361	0.594639	3.04994	0.00228885	0.00734326
NM_011416	Smarca2	1949.82	0.872343	0.202049	4.31748	1.57818e-05	8.40145e-05
NM_011427	Snai1	395.493	2.52137	0.46155	5.46284	4.68574e-08	3.95372e-07
NM_011438	Sox12	145.679	1.94656	0.47802	4.07213	4.65853e-05	0.000225331
NM_011439	Sox13	293.88	3.61738	0.387262	9.3409	9.55175e-21	4.49139e-19
NM_011467	Spr	115.068	3.75042	0.494852	7.57887	3.48589e-14	7.30257e-13
NM_011471	Sprr2e	7.80343	3.81423	1.28027	2.97923	0.00288976	0.00903078
NM_011484	Stam	305.101	1.1019	0.306343	3.59695	0.000321972	0.00129505
NM_011485	Star	95.5921	2.71807	0.455745	5.96403	2.46095e-09	2.60104e-08
NM_011491	Stc2	1422.32	4.17823	0.273754	15.2627	1.35442e-52	1.28568e-49
NM_011496	Aurkb	822.63	0.842226	0.256902	3.27839	0.001044	0.00367725
NM_011499	Strap	2445.1	1.42685	0.311972	4.57364	4.79323e-06	2.8139e-05
NM_011504	Stxbp3	262.359	1.18732	0.369266	3.21536	0.0013028	0.00446758
NM_011517	Sycp3	1673.65	2.7003	0.380837	7.09044	1.33691e-12	2.30738e-11
NM_011520	Sdc3	53.0654	4.04318	0.633808	6.37919	1.78029e-10	2.22727e-09
NM_011521	Sdc4	123.129	3.02449	0.529551	5.71142	1.12037e-08	1.05298e-07
NM_011522	Syngr3	509.295	1.12539	0.283477	3.96996	7.18861e-05	0.000331755
NM_011528	Taldo1	222.788	1.49977	0.350843	4.27476	1.91342e-05	0.000100176
NM_011540	Tcap	5.39238	3.97837	1.25067	3.181	0.00146765	0.00496452
NM_011565	Tead2	61.1497	2.23722	0.563041	3.97346	7.08374e-05	0.000327513
NM_011568	Alyref	186.884	1.53883	0.363519	4.23314	2.30448e-05	0.000118887
NM_011582	Thbs4	271.617	1.8215	0.332882	5.47192	4.45175e-08	3.76675e-07
NM_011591	Timm17b	245.103	1.54459	0.297149	5.19803	2.01415e-07	1.52955e-06
NM_011594	Timp2	111.132	3.22462	0.460608	7.00079	2.54519e-12	4.18359e-11
NM_011595	Timp3	87.7365	5.49507	0.930013	5.90859	3.45051e-09	3.55297e-08
NM_011599	Tle1	345.387	1.37082	0.259815	5.27614	1.31934e-07	1.03077e-06
NM_011600	Tle4	2949.28	2.22816	0.32244	6.91031	4.83588e-12	7.59538e-11
NM_011603	Tbpl1	1096.43	2.44325	0.318051	7.68194	1.56695e-14	3.44911e-13
NM_011605	Tmpo	935.899	2.50954	0.349354	7.18338	6.80105e-13	1.2039e-11
NM_011609	Tnfrsf1a	18.3271	3.9709	0.991627	4.00443	6.21665e-05	0.000291664
NM_011625	Ppp1r13b	1764.8	1.03726	0.254714	4.07224	4.65635e-05	0.000225297
NM_011630	Nr2c2	711.426	1.76735	0.32146	5.49788	3.84379e-08	3.30014e-07
NM_011634	Traip	734.757	1.47366	0.318178	4.63156	3.62921e-06	2.18212e-05
NM_011635	Trap1a	25.0709	4.85283	0.873674	5.55451	2.78395e-08	2.46116e-07
NM_011636	Plscr1	57.9642	1.60305	0.469102	3.41727	0.000632525	0.00235981
NM_011638	Tfrc	1040.06	2.28155	0.347041	6.57428	4.88877e-11	6.63544e-10
NM_011650	Tsn	1418.36	1.4421	0.250683	5.75269	8.78322e-09	8.43233e-08
NM_011652	Ttn	5977.6	1.43624	0.310268	4.62902	3.67402e-06	2.20645e-05
NM_011654	Tuba1b	2104.32	0.806261	0.260164	3.09905	0.00194145	0.00635489
NM_011656	Tuft1	241.553	3.13762	0.376181	8.34071	7.38428e-17	2.15678e-15
NM_011659	Tnfrsf4	17.0815	3.46292	0.873757	3.96325	7.39362e-05	0.000340183
NM_011663	Zrsr1	81.6545	3.01195	0.465355	6.47237	9.64746e-11	1.24703e-09
NM_011669	Usp12	1296.77	2.77287	0.312177	8.88235	6.54647e-19	2.47949e-17
NM_011672	Ufd1l	446.464	1.05966	0.274192	3.86465	0.00011125	0.000492755
NM_011674	Ugt8a	855.307	1.62935	0.465669	3.49895	0.000467088	0.0018064
NM_011675	Uck1	11.2132	4.11278	1.17868	3.4893	0.000484291	0.0018678
NM_011708	Vwf	53.899	2.06114	0.553463	3.72407	0.000196034	0.000824985
NM_011738	Ywhah	1658.21	1.10986	0.218721	5.07432	3.88884e-07	2.7979e-06
NM_011762	Zfp59	74.0797	5.13532	0.632382	8.12061	4.63846e-16	1.22095e-14
NM_011763	Zfp9	8.70254	3.30124	1.01013	3.26814	0.00108255	0.00379455
NM_011775	Zp2	42868.4	1.04125	0.341293	3.05088	0.00228168	0.00732181
NM_011776	Zp3	42681.6	0.934813	0.201748	4.63357	3.59409e-06	2.16443e-05
NM_011777	Zyx	338.009	2.53165	0.415786	6.08883	1.1374e-09	1.27114e-08
NM_011790	Arih2	414.318	2.43867	0.321877	7.57642	3.55219e-14	7.421e-13
NM_011794	Bpnt1	174.232	3.35517	0.482602	6.95224	3.5954e-12	5.77241e-11
NM_011798	Xcr1	8.786	4.7494	1.19333	3.97997	6.8923e-05	0.000319439
NM_011803	Klf6	280.723	2.38537	0.469246	5.0834	3.7073e-07	2.67617e-06
NM_011804	Creg1	608.056	1.53126	0.386889	3.95789	7.56144e-05	0.000346958
NM_011812	Fbln5	203.92	3.47566	0.340712	10.2011	1.95951e-24	1.45887e-22
NM_011829	Impdh1	42.6432	1.86457	0.551992	3.37789	0.000730443	0.00268294
NM_011830	Impdh2	38.1539	2.98134	0.604758	4.92981	8.23088e-07	5.57337e-06
NM_011841	Mapk7	185.927	1.62147	0.349109	4.6446	3.40735e-06	2.06343e-05
NM_011842	Mta2	505.937	4.09431	0.344899	11.871	1.67377e-32	2.70439e-30
NM_011849	Nek4	268.698	1.57485	0.27056	5.82071	5.85973e-09	5.76782e-08
NM_011860	Nlrp5	1778.85	1.40607	0.319082	4.4066	1.05004e-05	5.79084e-05
NM_011875	Psmd13	156.131	3.14088	0.400245	7.84741	4.24731e-15	1.00794e-13
NM_011881	Grk1	66.0073	2.44779	0.575703	4.25182	2.12037e-05	0.0001101
NM_011890	Sgcb	267.404	2.14864	0.364042	5.90219	3.58705e-09	3.67364e-08
NM_011894	Sh3bp5	142.952	3.94743	0.446741	8.83606	9.91555e-19	3.64643e-17
NM_011897	Spry2	37.3343	4.21733	0.85833	4.91341	8.95051e-07	6.01506e-06
NM_011900	Mpdu1	33.6741	4.83194	0.80933	5.97029	2.36828e-09	2.51088e-08
NM_011920	Abcg2	19.4381	2.89762	0.854012	3.39294	0.000691456	0.00255146
NM_011923	Angptl2	2781.77	1.57429	0.281665	5.58922	2.28092e-08	2.0366e-07
NM_011930	Clcn7	230.752	2.79907	0.398211	7.02911	2.07861e-12	3.48069e-11
NM_011933	Decr2	44.1208	2.83501	0.611277	4.63784	3.52068e-06	2.12613e-05
NM_011936	Fto	311.986	2.03949	0.329567	6.1884	6.07781e-10	7.05193e-09
NM_011937	Gnpda1	175.022	3.73199	0.411345	9.07265	1.16152e-19	4.80684e-18
NM_011942	Lypla2	75.1924	1.79865	0.456909	3.93657	8.26547e-05	0.000376985
NM_011945	Map3k1	418.456	1.99423	0.323937	6.15622	7.45022e-10	8.54636e-09
NM_011946	Map3k2	695.914	1.60843	0.466115	3.45071	0.000559104	0.00211657
NM_011947	Map3k3	55.1439	3.516	0.498353	7.05524	1.723e-12	2.9239e-11
NM_011955	Nubp1	50.5666	1.57003	0.477165	3.29034	0.00100067	0.00354519
NM_011956	Nubp2	463.738	1.09367	0.369218	2.96211	0.00305535	0.00947615
NM_011957	Creb3l1	149.65	3.76805	0.505858	7.44883	9.41711e-14	1.88194e-12
NM_011960	Parg	1067.36	0.996239	0.287799	3.46158	0.000537024	0.00204727
NM_011962	Plod3	85.8892	2.30801	0.443537	5.20365	1.95413e-07	1.48694e-06
NM_011975	Rpl27a	167.989	1.48925	0.410517	3.62774	0.000285914	0.00116733
NM_011977	Slc27a1	87.2218	2.38365	0.62731	3.7998	0.000144815	0.000627027
NM_011978	Slc27a2	433.969	2.58576	0.312671	8.26991	1.34066e-16	3.78474e-15
NM_011980	Zfp146	109.574	2.07842	0.390378	5.32411	1.01446e-07	8.12298e-07
NM_011986	Ncdn	246.361	1.62449	0.329345	4.93247	8.11956e-07	5.50535e-06
NM_011988	Slc27a3	24.0167	4.84914	0.970141	4.99839	5.78103e-07	4.03503e-06
NM_011989	Slc27a4	117.173	4.16755	0.546323	7.62835	2.37771e-14	5.14426e-13
NM_012000	Cln8	220.729	4.23681	0.463909	9.13286	6.67114e-20	2.85412e-18
NM_012013	Figla	390.671	1.91163	0.247841	7.71313	1.22766e-14	2.7501e-13
NM_012014	Gprin1	6.73294	3.58733	1.14365	3.13672	0.00170847	0.00568167
NM_012017	Zfp346	437.173	2.85995	0.433763	6.59333	4.30061e-11	5.88978e-10
NM_012032	Serinc3	2557.06	1.13689	0.306685	3.70702	0.000209712	0.000876232
NM_012037	Vat1	620.698	2.69841	0.408374	6.6077	3.90345e-11	5.37981e-10
NM_012052	Rps3	814.223	1.40675	0.308298	4.56296	5.04376e-06	2.94406e-05
NM_012055	Asns	601.864	4.80981	0.286806	16.7703	4.02801e-63	6.11773e-60
NM_012056	Fkbp9	195.595	1.38997	0.39716	3.49978	0.00046564	0.00180274
NM_013454	Abca1	94.8507	3.82803	0.458058	8.35708	6.42917e-17	1.88871e-15
NM_013469	Anxa11	29.0848	3.50795	0.810354	4.32891	1.49852e-05	8.00826e-05
NM_013481	Bop1	194.853	1.18486	0.363298	3.2614	0.00110863	0.00386989
NM_013493	Cnbp	118.746	1.21414	0.355528	3.41504	0.000637716	0.00237509
NM_013495	Cpt1a	73.2744	2.23277	0.64182	3.47881	0.000503644	0.00193507
NM_013496	Crabp1	11.5579	5.12946	1.16642	4.39761	1.09448e-05	6.01192e-05
NM_013519	Foxc2	43.0254	3.36416	0.681612	4.93559	7.99071e-07	5.43011e-06
NM_013522	Frg1	243.599	1.18474	0.296669	3.99346	6.51159e-05	0.000303554
NM_013528	Gfpt1	2057.88	1.38344	0.285335	4.84847	1.24418e-06	8.1451e-06
NM_013539	Spsb2	12.1649	5.35235	1.14033	4.69369	2.68323e-06	1.65932e-05
NM_013550	Hist1h3a	52.5115	3.24251	0.570702	5.68162	1.33424e-08	1.23639e-07
NM_013555	Hoxd9	264.788	1.45338	0.3152	4.61098	4.00768e-06	2.38607e-05
NM_013559	Hsph1	12316.7	0.940697	0.318313	2.95526	0.00312407	0.00966558
NM_013565	Itga3	51.3752	3.60852	0.585768	6.16032	7.25988e-10	8.34201e-09
NM_013570	Krt33b	11.1156	3.08662	0.936318	3.29656	0.00097878	0.00347655
NM_013582	Lhcgr	96.7223	4.92502	1.22187	4.03071	5.56079e-05	0.000264259
NM_013584	Lifr	156.129	1.35913	0.4061	3.34678	0.000817568	0.00296071
NM_013587	Lrpap1	764.952	1.72681	0.233512	7.39492	1.4149e-13	2.7657e-12
NM_013590	Lyz1	8.39943	4.22099	1.2493	3.37867	0.000728363	0.00267595
NM_013601	Msx2	71.2818	3.49945	0.504066	6.94244	3.85371e-12	6.14813e-11
NM_013605	Muc1	10.6321	3.38439	0.975123	3.47073	0.000519048	0.00198822
NM_013657	Sema3c	59.8302	2.27113	0.556645	4.08002	4.5031e-05	0.000218578
NM_013659	Sema4b	704.525	1.16718	0.363922	3.20724	0.00134015	0.00458221
NM_013669	Snap91	364.604	1.25234	0.311427	4.02128	5.7882e-05	0.000273611
NM_013671	Sod2	447.84	1.15849	0.365049	3.17352	0.00150601	0.00508296
NM_013681	Syn2	16.0385	5.64533	1.12709	5.00874	5.47866e-07	3.84697e-06
NM_013691	Thbs3	14.0818	5.55025	1.12639	4.92747	8.32997e-07	5.63544e-06
NM_013692	Klf10	444.544	1.04331	0.268332	3.88813	0.00010102	0.00045206
NM_013716	G3bp1	672.291	1.07935	0.308475	3.49899	0.00046703	0.0018064
NM_013723	Podxl	43.9414	3.93792	0.603341	6.52686	6.71623e-11	8.94791e-10
NM_013736	Tceb3	2748.8	2.4239	0.351683	6.89229	5.48997e-12	8.57837e-11
NM_013739	Dok3	7.53221	3.69224	1.13578	3.25085	0.00115061	0.00399897
NM_013745	Nufip1	617.329	1.34056	0.257202	5.21207	1.86742e-07	1.42525e-06
NM_013760	Dnajb9	547.457	2.50315	0.364914	6.85955	6.90801e-12	1.05979e-10
NM_013763	Tbl2	499.412	3.2974	0.405365	8.1344	4.13985e-16	1.10309e-14
NM_013768	Prmt5	486.882	1.99757	0.263949	7.56801	3.78974e-14	7.9064e-13
NM_013771	Yme1l1	523.209	1.47964	0.336482	4.39737	1.09569e-05	6.0145e-05
NM_013785	Ip6k1	243.496	3.45311	0.409011	8.44258	3.10398e-17	9.48556e-16
NM_013790	Abcc5	428.653	2.82894	0.29134	9.71012	2.73013e-22	1.61343e-20
NM_013821	Hsd3b6	162.649	2.60345	0.489959	5.31361	1.07476e-07	8.55334e-07
NM_013823	Kl	355.229	2.56537	0.413016	6.2113	5.25469e-10	6.15329e-09
NM_013834	Sfrp1	48.544	2.69226	0.682651	3.94383	8.01909e-05	0.000366629
NM_013842	Xbp1	15.1734	4.88105	1.01452	4.81116	1.50054e-06	9.68559e-06
NM_013863	Bag3	72.9671	4.73871	0.868282	5.45757	4.82693e-08	4.05708e-07
NM_013871	Mapk12	4.63861	3.84865	1.25598	3.06426	0.00218208	0.00705439
NM_013873	Sult4a1	333.064	1.45695	0.394533	3.69284	0.000221763	0.000923789
NM_013876	Rnf11	412.24	3.41657	0.4555	7.50071	6.34748e-14	1.28884e-12
NM_013881	Ulk2	532.079	1.16953	0.228869	5.11004	3.22097e-07	2.35294e-06
NM_013885	Clic4	7413.04	0.755719	0.188713	4.00459	6.21253e-05	0.000291582
NM_013886	Hdgfrp3	544.497	4.05211	0.415538	9.75147	1.81813e-22	1.10899e-20
NM_013889	Zfp292	722.289	2.88917	0.304551	9.48664	2.38609e-21	1.22432e-19
NM_013892	Pcsk1n	48.8137	4.01308	0.642616	6.24491	4.2404e-10	5.02365e-09
NM_013901	Slc39a1	255.267	2.98449	0.433091	6.89114	5.53457e-12	8.63917e-11
NM_013902	Fkbp3	400.933	2.06037	0.301991	6.82263	8.93915e-12	1.34777e-10
NM_013915	Zbtb18	15.324	2.84425	0.871375	3.26409	0.00109815	0.00383992
NM_013922	Zfp354c	63.2017	2.32116	0.573888	4.04463	5.24065e-05	0.000250693
NM_013924	Abt1	204.386	1.09858	0.342913	3.20366	0.00135693	0.00463332
NM_013926	Cbx8	34.5028	3.30635	0.604668	5.46805	4.55024e-08	3.8458e-07
NM_013933	Vapa	2057.53	1.71287	0.325405	5.2638	1.41106e-07	1.09847e-06
NM_015729	Acox1	9.2161	4.07977	1.0884	3.7484	0.000177965	0.000757124
NM_015733	Casp9	251.135	0.94987	0.267187	3.55507	0.000377874	0.00149418
NM_015747	Slc20a1	1373.24	0.825246	0.219275	3.76353	0.000167534	0.000715351
NM_015751	Abce1	804.77	2.09452	0.30559	6.85401	7.18084e-12	1.09942e-10
NM_015769	Ercc4	220.902	1.87861	0.49643	3.78424	0.000154181	0.000663183
NM_015771	Lats2	377.759	3.19301	0.316448	10.0902	6.10628e-24	4.25423e-22
NM_015774	Ero1l	548.285	4.3579	0.431432	10.101	5.46863e-24	3.86035e-22
NM_015782	Snrpa	109.914	1.50783	0.431505	3.49435	0.000475223	0.0018361
NM_015786	Hist1h1c	295.539	2.80167	0.372226	7.52678	5.20054e-14	1.06882e-12
NM_015787	Hist1h1e	1029.32	4.11941	0.447404	9.20735	3.34275e-20	1.4845e-18
NM_015800	Crim1	75.0084	3.33267	0.594331	5.60743	2.05354e-08	1.8477e-07
NM_015830	Capn15	47.8682	3.99488	0.705448	5.66289	1.48841e-08	1.36757e-07
NM_016662	Mxd3	6.48357	4.01992	1.2558	3.20109	0.00136909	0.00467065
NM_016667	Sntb1	10.6652	3.10222	0.992284	3.12634	0.00176994	0.005863
NM_016670	Pknox1	497.67	2.24748	0.354071	6.34754	2.18788e-10	2.6972e-09
NM_016678	Reck	126.128	4.08657	0.422713	9.66748	4.1447e-22	2.33147e-20
NM_016681	Chek2	179.751	3.2878	0.317034	10.3705	3.37703e-25	2.77245e-23
NM_016685	Comp	82.9516	3.15196	0.552488	5.70503	1.16321e-08	1.09055e-07
NM_016695	Mpp2	125.842	3.79657	0.492714	7.70542	1.30412e-14	2.90424e-13
NM_016701	Nes	1409.31	4.52635	0.467113	9.69005	3.32366e-22	1.91938e-20
NM_016706	Coil	505.091	2.79343	0.307149	9.0947	9.48478e-20	3.95755e-18
NM_016721	Iqgap1	2949.57	2.50793	0.34112	7.35206	1.95173e-13	3.77616e-12
NM_016746	Ccnc	158.686	2.26179	0.607025	3.72603	0.000194521	0.000819297
NM_016750	H2afz	113.03	3.26948	0.411004	7.95486	1.79335e-15	4.43605e-14
NM_016755	Atp5j	522.49	1.00522	0.305284	3.29272	0.000992218	0.00351889
NM_016763	Hsd17b10	583.869	4.80324	0.288543	16.6465	3.20636e-62	4.42711e-59
NM_016768	Pbx3	261.727	1.17259	0.37946	3.09016	0.00200051	0.00653414
NM_016772	Ech1	39.852	1.79848	0.550488	3.26706	0.0010867	0.00380647
NM_016776	Mybbp1a	932.515	1.4582	0.270182	5.3971	6.77255e-08	5.58726e-07
NM_016783	Pgrmc1	248.957	1.04418	0.275149	3.79495	0.000147672	0.000638078
NM_016809	Rbm3	9.23727	4.07856	1.09052	3.74003	0.000184	0.000779743
NM_016810	Gosr1	406.34	1.39255	0.262998	5.29491	1.19077e-07	9.3755e-07
NM_016843	Atxn10	206.94	2.38449	0.560287	4.25584	2.08264e-05	0.000108326
NM_016858	Rab33b	654.858	1.22711	0.372003	3.29867	0.000971446	0.00345395
NM_016874	Deaf1	199.454	2.58035	0.395093	6.531	6.53312e-11	8.72691e-10
NM_016896	Map3k14	57.6745	5.15207	0.638525	8.0687	7.10489e-16	1.82897e-14
NM_016899	Rab25	79.8225	2.29128	0.496606	4.61388	3.9522e-06	2.35581e-05
NM_016909	Tsnax	4661.64	0.754126	0.228377	3.3021	0.000959632	0.00341812
NM_016911	Srpx	23.7018	6.23654	1.08346	5.75613	8.60639e-09	8.27303e-08
NM_016957	Hmgn2	150.729	4.80571	1.09682	4.38151	1.17858e-05	6.4297e-05
NM_016959	Rps3a1	290.915	1.67986	0.307073	5.47054	4.48656e-08	3.79409e-07
NM_016963	Tmod3	1463.09	1.38181	0.311993	4.42897	9.46845e-06	5.27344e-05
NM_016966	Phgdh	278.832	2.35424	0.348353	6.7582	1.39718e-11	2.05028e-10
NM_016968	Olig1	13.8301	4.88408	1.03562	4.7161	2.40409e-06	1.50137e-05
NM_016978	Oat	562.973	0.90927	0.251781	3.61135	0.000304612	0.00123372
NM_016985	Mtmr1	109.397	5.08912	0.564735	9.01152	2.03227e-19	8.16564e-18
NM_017371	Hpx	17.1524	5.03811	1.00915	4.99242	5.96271e-07	4.1504e-06
NM_017374	Ppp2cb	404.884	4.15078	0.375115	11.0654	1.84715e-28	2.17477e-26
NM_017397	Ddx20	433.191	1.32256	0.31995	4.13365	3.57046e-05	0.000176927
NM_017467	Zfp316	310.036	2.84632	0.495378	5.74575	9.1515e-09	8.7472e-08
NM_017476	Akap8l	204.26	1.00298	0.339	2.95865	0.00308992	0.00957555
NM_018754	Sfn	34.5572	2.06859	0.564932	3.66166	0.000250582	0.00103419
NM_018759	Zfp326	153.516	1.60023	0.356565	4.48789	7.19321e-06	4.0826e-05
NM_018763	Chst2	15.8243	3.16924	1.02116	3.10357	0.00191203	0.0062762
NM_018765	Wbp4	855.697	0.997855	0.267854	3.72537	0.000195028	0.000821205
NM_018771	Gipc1	103.976	3.00213	0.42733	7.02532	2.13579e-12	3.56858e-11
NM_018778	Cldn8	1065.96	1.72383	0.300817	5.73049	1.00143e-08	9.50013e-08
NM_018783	Tfip11	972.151	1.13023	0.293053	3.85673	0.000114915	0.000508102
NM_018789	Foxo4	28.9687	4.54743	0.759271	5.9892	2.10871e-09	2.25861e-08
NM_018794	Atp6ap1	1248.97	0.870745	0.219811	3.96133	7.45344e-05	0.000342727
NM_018805	Hs3st3b1	213.727	2.37663	0.443619	5.35736	8.44467e-08	6.84771e-07
NM_018815	Nup210	355.125	2.65265	0.308782	8.5907	8.64413e-18	2.85407e-16
NM_018818	Chm	285.226	1.08916	0.325089	3.35033	0.000807155	0.00292807
NM_018820	Sertad1	42.7357	2.68002	0.666791	4.01928	5.83771e-05	0.00027578
NM_018825	Sh2b2	42.3403	2.47247	0.532025	4.64727	3.36359e-06	2.03774e-05
NM_018861	Slc1a4	238.86	5.13491	0.418471	12.2707	1.30199e-34	2.78515e-32
NM_018864	Impa1	64.4729	1.93872	0.599651	3.23308	0.00122464	0.0042253
NM_018865	Wisp1	54.6892	1.84004	0.513931	3.58033	0.000343166	0.00137158
NM_018884	Pdzrn3	2277.97	2.22274	0.286529	7.75748	8.66362e-15	1.99974e-13
NM_019392	Tyro3	128.227	3.84534	0.562317	6.83838	8.00917e-12	1.22009e-10
NM_019410	Pfn2	324.869	0.991494	0.260043	3.8128	0.000137401	0.000599496
NM_019420	B3galt4	23.2191	2.62071	0.828988	3.16134	0.00157044	0.00527347
NM_019423	Elovl2	154.996	2.686	0.480191	5.5936	2.22403e-08	1.99166e-07
NM_019424	Hps1	86.2131	1.31215	0.407967	3.21631	0.00129851	0.0044549
NM_019428	Rpp30	717.914	1.41113	0.424271	3.32601	0.000880976	0.00316169
NM_019442	Stk19	51.1581	3.07091	0.761246	4.03405	5.48232e-05	0.00026102
NM_019457	Lrrc6	355.91	2.00168	0.370351	5.40483	6.487e-08	5.36626e-07
NM_019472	Myo10	8866.57	2.43071	0.483621	5.02607	5.00631e-07	3.55308e-06
NM_019496	Ammecr1	644.095	1.5036	0.364542	4.12463	3.71329e-05	0.000183347
NM_019545	Hao2	11.9542	4.33482	1.08877	3.98138	6.85171e-05	0.000317849
NM_019552	Abcb10	82.225	2.41428	0.509658	4.73706	2.16843e-06	1.36379e-05
NM_019553	Ddx21	1186.17	1.49928	0.269972	5.55346	2.80067e-08	2.4745e-07
NM_019561	Ensa	204.673	1.28694	0.403143	3.19226	0.00141164	0.00480285
NM_019563	Cited4	16.9681	4.34603	1.00462	4.32605	1.51809e-05	8.10429e-05
NM_019566	Rhog	32.7814	3.24654	0.793401	4.09193	4.27798e-05	0.000208651
NM_019578	Extl1	113.114	5.13234	1.2554	4.08822	4.34705e-05	0.000211612
NM_019586	Ube2j1	1910.06	1.16383	0.196906	5.91058	3.40896e-09	3.51735e-08
NM_019632	Napb	85.0863	2.88315	0.432139	6.67181	2.52676e-11	3.5468e-10
NM_019640	Pitpnb	219.283	4.01118	0.482733	8.30931	9.6262e-17	2.78481e-15
NM_019641	Stmn1	126.424	1.32502	0.413198	3.20675	0.00134246	0.00458907
NM_019651	Ptpn9	604.853	1.25772	0.272391	4.61733	3.88709e-06	2.32338e-05
NM_019653	Wsb1	110.624	1.46105	0.350347	4.17028	3.04223e-05	0.000152695
NM_019656	Tspan6	70.4186	3.0069	0.525632	5.72054	1.06185e-08	1.00295e-07
NM_019661	Ykt6	506.109	1.51309	0.381166	3.96964	7.19803e-05	0.000332089
NM_019666	Syncrip	83.5842	1.88503	0.440352	4.28074	1.86272e-05	9.77235e-05
NM_019667	Stam2	911.162	1.74533	0.266065	6.55981	5.3876e-11	7.25416e-10
NM_019678	Tfg	717.777	1.25885	0.22493	5.59664	2.18547e-08	1.95944e-07
NM_019681	Ncs1	79.3499	3.13851	0.504432	6.22188	4.91239e-10	5.78816e-09
NM_019685	Ruvbl1	216.858	2.50159	0.430348	5.81295	6.13822e-09	6.02244e-08
NM_019689	Arid3b	1449.58	1.75279	0.44209	3.96479	7.34619e-05	0.000338318
NM_019698	Aldh18a1	6.57098	3.56115	1.14223	3.11771	0.00182262	0.00602175
NM_019699	Fads2	17.0509	2.95488	0.988408	2.98953	0.00279408	0.0087516
NM_019704	Tmem115	44.5863	3.00783	0.662271	4.54168	5.58072e-06	3.23018e-05
NM_019724	Mmp16	192.184	2.24762	0.333516	6.73915	1.59313e-11	2.31767e-10
NM_019727	Snx1	491.875	2.14932	0.325597	6.60117	4.07922e-11	5.60681e-10
NM_019731	Nme4	25.4653	3.05926	0.823438	3.71523	0.000203022	0.00085156
NM_019734	Asah1	136.756	1.28552	0.355799	3.61306	0.000302607	0.00122723
NM_019738	Nupr1	205.596	7.55305	0.669137	11.2877	1.50858e-29	1.94172e-27
NM_019742	Tusc2	119.362	3.75773	0.405569	9.26532	1.94496e-20	8.8976e-19
NM_019743	Rybp	2107.12	0.95867	0.285473	3.35819	0.000784557	0.00285683
NM_019745	Pdcd10	234.29	1.77926	0.374667	4.7489	2.04523e-06	1.2916e-05
NM_019748	Sae1	675.986	1.94488	0.364481	5.33603	9.50052e-08	7.6346e-07
NM_019749	Gabarap	177.796	1.95285	0.350995	5.56377	2.64011e-08	2.34491e-07
NM_019758	Mtch2	76.4758	1.90944	0.453166	4.21355	2.51389e-05	0.000128685
NM_019763	Spen	2227.64	1.47837	0.2726	5.42322	5.85342e-08	4.86866e-07
NM_019764	Amotl2	17.3119	3.70645	0.919665	4.03022	5.57246e-05	0.000264648
NM_019766	Ptges3	2566.25	1.2721	0.276406	4.60229	4.17877e-06	2.48016e-05
NM_019767	Arpc1a	640.272	2.9295	0.325649	8.99587	2.34365e-19	9.3426e-18
NM_019772	1110004F10Rik	462.397	2.56296	0.311085	8.23876	1.73998e-16	4.86683e-15
NM_019786	Tbk1	952.096	1.73919	0.241149	7.21208	5.51051e-13	9.8579e-12
NM_019788	Bloc1s6	173.599	3.20582	0.442976	7.23701	4.58679e-13	8.3731e-12
NM_019791	Maged1	3394.15	4.67407	0.283994	16.4584	7.30632e-61	9.24736e-58
NM_019793	Tspan3	2072.1	2.48583	0.337062	7.37499	1.64357e-13	3.20443e-12
NM_019796	Syncrip	365.005	2.05279	0.436061	4.70757	2.50684e-06	1.5604e-05
NM_019806	Vapb	638.351	0.982155	0.233211	4.21144	2.53744e-05	0.000129716
NM_019812	Sirt1	317.455	1.2005	0.372984	3.21864	0.001288	0.00442583
NM_019827	Gsk3b	4200.26	1.27565	0.333812	3.82144	0.000132672	0.000580365
NM_019830	Prmt1	14.3873	2.93159	0.801409	3.65804	0.000254149	0.00104774
NM_019831	Zmym3	197.49	1.47506	0.316453	4.66124	3.1431e-06	1.91948e-05
NM_019861	Ctsf	63.5505	5.5148	0.728978	7.56511	3.87549e-14	8.0742e-13
NM_019874	Dnajb5	36.4587	4.75007	0.813688	5.8377	5.29268e-09	5.25738e-08
NM_019916	Tlx3	16.2259	3.10393	0.824231	3.76585	0.000165982	0.000709523
NM_019919	Ltbp1	10.3066	4.20565	1.25931	3.33966	0.000838823	0.0030319
NM_019924	Rps6ka4	8.63041	3.28802	1.08666	3.02582	0.00247959	0.00788692
NM_019935	Ovol1	292.639	3.53721	0.364299	9.70964	2.74308e-22	1.6148e-20
NM_019940	Zfp111	305.92	3.34002	0.472119	7.07453	1.49958e-12	2.57351e-11
NM_019965	Dnajb12	275.159	1.15134	0.342389	3.36267	0.000771919	0.0028196
NM_019975	Hacl1	58.1445	2.9588	0.620013	4.77215	1.82271e-06	1.16072e-05
NM_019986	Habp4	276.452	2.44292	0.30292	8.06456	7.34989e-16	1.88564e-14
NM_019990	Stard10	142.572	2.24699	0.469796	4.7829	1.72781e-06	1.1026e-05
NM_019996	Phax	99.4831	2.72627	0.481718	5.65947	1.51842e-08	1.39261e-07
NM_020003	Glmp	383.337	3.11354	0.385519	8.07623	6.67988e-16	1.72541e-14
NM_020010	Cyp51	278.095	1.14206	0.26359	4.33271	1.47285e-05	7.88918e-05
NM_020013	Fgf21	57.2681	7.4631	1.00484	7.42718	1.10941e-13	2.19969e-12
NM_020026	B3galnt1	816.132	1.64353	0.374564	4.38785	1.14475e-05	6.26315e-05
NM_020028	Lpar2	113.471	3.35759	0.416515	8.06114	7.55839e-16	1.92612e-14
NM_020043	Igdcc4	43.2875	2.79347	0.730576	3.82365	0.000131492	0.000575366
NM_020050	Tmem9b	268.445	1.16393	0.307392	3.78645	0.000152814	0.000657862
NM_020262	Zfp109	137.493	1.40469	0.458683	3.06243	0.00219544	0.00709154
NM_020270	Scamp5	2115.76	1.71807	0.447583	3.83856	0.000123756	0.000544339
NM_020271	Pdxp	647.771	1.59925	0.428642	3.73098	0.00019074	0.000804936
NM_020275	Tnfrsf10b	31.6156	4.34178	0.863377	5.02883	4.93478e-07	3.50722e-06
NM_020296	Rbms1	6.25198	3.94694	1.26084	3.13041	0.00174562	0.00579079
NM_020329	Dolpp1	84.1914	4.64878	0.526996	8.82128	1.13159e-18	4.12147e-17
NM_020332	Ank	500.079	1.02494	0.344416	2.97587	0.0029216	0.00911718
NM_020520	Slc25a20	616.741	1.55277	0.362761	4.28043	1.86535e-05	9.78281e-05
NM_020558	C1d	183.055	3.22111	0.484667	6.64603	3.01103e-11	4.1994e-10
NM_020559	Alas1	730.944	0.727909	0.244777	2.97376	0.00294173	0.00917246
NM_020568	Plin4	12.3558	4.42368	1.12945	3.91666	8.97844e-05	0.000406278
NM_020577	As3mt	100.103	1.78756	0.457999	3.90297	9.50183e-05	0.00042709
NM_020579	B4galt3	87.4832	1.97516	0.560287	3.52527	0.000423054	0.00165644
NM_020580	Nelfcd	760.162	1.08277	0.270755	3.99906	6.35945e-05	0.000297466
NM_020581	Angptl4	40.7136	5.06743	0.791957	6.39862	1.56783e-10	1.97121e-09
NM_020584	Terf2ip	279.944	3.06248	0.343106	8.92574	4.42722e-19	1.70661e-17
NM_020601	Tbl1x	241.18	6.09244	0.456707	13.3399	1.35579e-40	4.78878e-38
NM_020604	Jph1	284.257	1.93426	0.327202	5.91152	3.38974e-09	3.50279e-08
NM_020606	Parva	29.1353	2.63574	0.761757	3.46008	0.000540023	0.00205664
NM_020608	Cramp1l	2147.05	1.90311	0.317622	5.99175	2.07596e-09	2.22668e-08
NM_020610	Nrip3	53.2611	4.20381	0.602583	6.97632	3.03004e-12	4.92196e-11
NM_020619	Mogs	22.5601	2.28819	0.711054	3.21802	0.00129079	0.0044324
NM_021273	Ckb	2738.76	1.27151	0.419283	3.03258	0.00242471	0.0077383
NM_021274	Cxcl10	10.1504	4.22989	1.13348	3.73178	0.000190131	0.000803032
NM_021282	Cyp2e1	12.9572	5.04788	1.18691	4.25294	2.10978e-05	0.000109587
NM_021299	Ak3	78.015	3.81328	0.521358	7.31413	2.5906e-13	4.89988e-12
NM_021303	Noc2l	442.062	1.28494	0.259573	4.95021	7.41335e-07	5.06723e-06
NM_021305	Sec61a2	200.676	3.74179	0.443	8.44648	3.00217e-17	9.21151e-16
NM_021308	Piwil2	1854.16	4.77398	0.317885	15.0179	5.60427e-51	4.72876e-48
NM_021310	Jmy	873.016	2.0794	0.354358	5.86807	4.40897e-09	4.4435e-08
NM_021320	Ntn4	12.6771	2.92402	0.876466	3.33614	0.000849493	0.0030639
NM_021322	Wdr4	66.5603	3.33929	0.490218	6.81186	9.63475e-12	1.4474e-10
NM_021337	Skiv2l	1542.38	2.01509	0.366845	5.49301	3.95132e-08	3.38863e-07
NM_021339	Cdon	1068.24	1.33555	0.367784	3.63135	0.000281943	0.00115391
NM_021345	Hacd3	1501.38	1.81552	0.336163	5.40072	6.63724e-08	5.48457e-07
NM_021356	Gab1	598.827	3.25894	0.321641	10.1322	3.97582e-24	2.88922e-22
NM_021390	Sall1	5.92998	4.28303	1.22298	3.50214	0.00046154	0.00179006
NM_021393	Nelfb	149.945	1.58234	0.402394	3.93231	8.41322e-05	0.000382919
NM_021420	Stk4	1086.45	1.98205	0.448558	4.41872	9.92871e-06	5.51186e-05
NM_021423	Shank3	74.1428	2.87167	0.536204	5.35556	8.52936e-08	6.90901e-07
NM_021424	Pvrl1	89.0407	3.19522	0.439641	7.26779	3.65419e-13	6.76002e-12
NM_021429	Hs1bp3	423.065	2.23064	0.388046	5.74838	9.01046e-09	8.62324e-08
NM_021431	Nudt11	20.9941	2.21016	0.723934	3.05299	0.00226577	0.00728152
NM_021436	Tmeff1	89.5967	3.23324	0.501095	6.45235	1.10126e-10	1.41266e-09
NM_021437	1700123O20Rik	79.5099	2.73172	0.545195	5.01053	5.42807e-07	3.81939e-06
NM_021441	Taf1c	211.135	3.24784	0.431773	7.52209	5.3906e-14	1.10638e-12
NM_021462	Mknk2	248.074	1.66233	0.402357	4.13147	3.60448e-05	0.000178438
NM_021463	Prps1	196.484	3.03215	0.361032	8.39857	4.51963e-17	1.36469e-15
NM_021482	Syngr4	130.729	1.71102	0.3413	5.01324	5.35203e-07	3.772e-06
NM_021491	Smpd3	47.9528	1.72371	0.55884	3.08444	0.00203938	0.00664823
NM_021492	Ap3b2	248.904	2.93132	0.381102	7.69168	1.45217e-14	3.2151e-13
NM_021493	Arhgap23	59.2541	2.80031	0.648425	4.31863	1.57e-05	8.3667e-05
NM_021494	Dennd5a	462.752	1.20446	0.238031	5.06009	4.19067e-07	2.99661e-06
NM_021516	Mark3	8.57612	3.18885	0.996397	3.20038	0.00137247	0.00468048
NM_021519	Edf1	768.647	0.933802	0.284407	3.28333	0.00102589	0.0036227
NM_021523	Huwe1	20209.2	0.685156	0.21504	3.18618	0.00144164	0.00489288
NM_021524	Nampt	500.59	1.96196	0.253844	7.72899	1.08399e-14	2.46831e-13
NM_021539	Wsb2	122.359	1.33204	0.35559	3.746	0.000179676	0.000763547
NM_021542	Kcnk5	119.337	2.4228	0.428207	5.658	1.53146e-08	1.40373e-07
NM_021546	Necab3	11.6622	2.85593	0.88687	3.22024	0.00128085	0.00440226
NM_021547	Stard3	154.283	3.1854	0.418624	7.60921	2.75787e-14	5.8912e-13
NM_021607	Ncstn	1338.8	0.711149	0.235538	3.01925	0.00253403	0.00802811
NM_021713	Myg1	203.169	1.77557	0.391817	4.53164	5.85268e-06	3.37345e-05
NM_021889	Syt9	190.43	2.30675	0.446341	5.16813	2.36454e-07	1.76996e-06
NM_021893	Cd274	284.021	3.94495	0.367321	10.7398	6.61818e-27	6.40235e-25
NM_021896	Gucy1a3	112.304	1.74371	0.567426	3.07301	0.00211908	0.00686825
NM_021898	Tsga8	14.0936	4.20033	0.978139	4.2942	1.75321e-05	9.25859e-05
NM_021899	Foxj2	1412.55	1.93435	0.279492	6.92095	4.48634e-12	7.10517e-11
NM_022012	Map3k11	1718.12	2.24809	0.45143	4.97994	6.36056e-07	4.40913e-06
NM_022018	Fam129a	163.478	2.34085	0.561258	4.17072	3.03635e-05	0.00015245
NM_022030	Sv2a	21.7864	2.64926	0.779404	3.39908	0.000676119	0.00249912
NM_022305	B4galt1	180.439	1.94763	0.375456	5.18737	2.13288e-07	1.61406e-06
NM_022325	Ctsz	37.394	2.46562	0.691348	3.56639	0.000361929	0.00143772
NM_022327	Ralb	32.678	2.54068	0.598697	4.24368	2.19882e-05	0.000113823
NM_022328	Mllt1	447.601	3.98249	0.436832	9.11676	7.74037e-20	3.26557e-18
NM_022331	Herpud1	547.248	8.54886	0.552475	15.4737	5.21793e-54	5.28332e-51
NM_022410	Myh9	3177.37	0.842865	0.242673	3.47325	0.000514192	0.00197108
NM_022427	Gpr88	22.1632	3.86359	0.859507	4.49512	6.95291e-06	3.95805e-05
NM_022435	Sp5	16.104	4.00716	0.918111	4.36457	1.27374e-05	6.89928e-05
NM_022656	Nisch	750.737	1.44727	0.279602	5.17616	2.26505e-07	1.70473e-06
NM_022721	Fzd5	41.1163	4.28589	0.928794	4.61447	3.94109e-06	2.35195e-05
NM_022987	Zic5	5.84348	4.28672	1.22121	3.51023	0.000447715	0.00174222
NM_022988	Nif3l1	320.034	2.67758	0.328102	8.16081	3.32772e-16	8.96124e-15
NM_022992	Arl6ip5	26.2479	3.05206	0.637944	4.78421	1.71664e-06	1.09594e-05
NM_022993	Lrp10	733.033	1.0683	0.319446	3.34423	0.000825121	0.00298593
NM_022995	Pmepa1	105.341	4.63624	0.540934	8.57081	1.02764e-17	3.34806e-16
NM_023051	Clstn1	399.694	1.43876	0.351156	4.09721	4.18161e-05	0.00020474
NM_023053	Twsg1	1540.84	1.70936	0.405034	4.22028	2.44003e-05	0.000125162
NM_023061	Mcam	41.0168	7.00773	1.03153	6.79353	1.09422e-11	1.63412e-10
NM_023065	Ifi30	168.817	3.50264	0.47651	7.3506	1.97317e-13	3.81279e-12
NM_023184	Klf15	25.0533	4.96607	0.937758	5.29568	1.18573e-07	9.34073e-07
NM_023203	Dctpp1	552.976	1.04125	0.33067	3.14891	0.00163882	0.00547645
NM_023214	Slc30a7	199.608	2.65323	0.402514	6.59164	4.34997e-11	5.94666e-10
NM_023220	Sppl2a	174.273	1.69106	0.485068	3.48624	0.000489867	0.00188691
NM_023229	Fastk	287.721	2.38387	0.415957	5.73104	9.98186e-09	9.4812e-08
NM_023230	Ube2v1	631.168	3.00729	0.294642	10.2066	1.85317e-24	1.39336e-22
NM_023258	Pycard	21.4822	4.42343	0.903705	4.89477	9.84214e-07	6.56489e-06
NM_023277	Jam3	660.403	1.64491	0.287165	5.72811	1.01554e-08	9.61599e-08
NM_023305	Ubap1	545.755	0.874153	0.258856	3.37698	0.000732858	0.00268986
NM_023312	Ndufa13	281.057	1.07279	0.32317	3.3196	0.000901472	0.0032261
NM_023314	Eif4e2	145.389	3.27574	0.449305	7.29069	3.08383e-13	5.76103e-12
NM_023326	Bmyc	159.574	5.36339	0.622762	8.61226	7.16323e-18	2.38064e-16
NM_023343	Ilkap	181.252	1.3494	0.39993	3.37408	0.000740625	0.002717
NM_023374	Sdhb	274.598	1.27486	0.328895	3.87619	0.000106103	0.000472442
NM_023402	Myl12b	1207.63	2.66085	0.27746	9.59003	8.80634e-22	4.72617e-20
NM_023418	Pgam1	72.2092	2.406	0.467132	5.15059	2.5967e-07	1.92686e-06
NM_023423	Akirin1	697.417	2.75215	0.375067	7.33776	2.17195e-13	4.1546e-12
NM_023434	Tox4	894.125	2.05421	0.305179	6.73116	1.68315e-11	2.43928e-10
NM_023480	Fahd1	49.9163	3.33963	0.652705	5.1166	3.11092e-07	2.28144e-06
NM_023525	Cad	404.436	3.09283	0.428158	7.22358	5.06373e-13	9.13396e-12
NM_023579	Ipo5	2577.03	1.00716	0.198476	5.07447	3.88572e-07	2.79698e-06
NM_023608	Gdpd2	20.3965	4.43157	1.03427	4.28473	1.82963e-05	9.61206e-05
NM_023627	Isyna1	546.765	2.43761	0.404678	6.02357	1.70607e-09	1.85748e-08
NM_023630	Gtf2a1l	987.081	1.15292	0.308642	3.73547	0.000187361	0.000792217
NM_023655	Trim29	88.518	4.26909	1.1946	3.57364	0.000352048	0.00140265
NM_023663	Ripk4	257.279	3.67796	0.629959	5.83841	5.27007e-09	5.24521e-08
NM_023672	Ssbp3	129.462	1.416	0.330298	4.28703	1.81079e-05	9.52294e-05
NM_023684	Lime1	63.7775	2.85544	0.496583	5.75017	8.91515e-09	8.53741e-08
NM_023733	Crot	300.859	1.79796	0.30563	5.88282	4.03342e-09	4.10312e-08
NM_023737	Ehhadh	13.9617	4.45629	0.979183	4.55103	5.33846e-06	3.09586e-05
NM_023739	Nfx1	1303.17	1.53125	0.235122	6.51255	7.38873e-11	9.77527e-10
NM_023755	Tfcp2l1	314.026	1.81937	0.409057	4.44771	8.67887e-06	4.85326e-05
NM_023774	4930550L24Rik	27.7694	2.31479	0.659837	3.50812	0.00045128	0.0017552
NM_023814	Tbx18	5.91159	4.20456	1.23179	3.41337	0.000641653	0.00238683
NM_023816	Ankrd36	54.8208	1.67929	0.497555	3.37508	0.000737947	0.00270789
NM_023903	Lipm	9.5288	3.86934	1.15489	3.35038	0.000806995	0.00292807
NM_024172	Hspbp1	42.896	3.94085	0.650872	6.05472	1.40661e-09	1.55484e-08
NM_024175	Rps23	26.5226	2.19788	0.624546	3.51917	0.000432904	0.00169065
NM_024191	Arl2bp	198.619	2.31392	0.294175	7.86579	3.66774e-15	8.78638e-14
NM_024196	Tbc1d20	1406.25	1.4459	0.205072	7.05068	1.78046e-12	3.01046e-11
NM_024197	Ndufa10	1295.82	0.854353	0.246236	3.46965	0.000521131	0.00199469
NM_024204	Ankrd22	57.2941	2.95389	0.602089	4.90608	9.29161e-07	6.22776e-06
NM_024209	Ppp6c	584.477	1.04455	0.287682	3.63093	0.000282406	0.00115549
NM_024214	Tomm20	536.094	4.2297	0.390238	10.8388	2.25473e-27	2.36172e-25
NM_024216	Gpn3	333.404	2.96762	0.399722	7.4242	1.13461e-13	2.24673e-12
NM_024246	Tmem79	32.3762	2.44739	0.628807	3.89212	9.93718e-05	0.000444947
NM_024248	Cars2	64.9361	1.69297	0.489735	3.4569	0.00054643	0.00207583
NM_024250	Phf10	753.165	1.85383	0.228044	8.12928	4.31841e-16	1.14265e-14
NM_024256	B3gat3	24.9746	3.91529	0.869442	4.50322	6.6933e-06	3.82028e-05
NM_024261	Armt1	87.4568	2.55974	0.412699	6.20242	5.56002e-10	6.49083e-09
NM_024281	Rrbp1	1261.41	1.43577	0.250104	5.7407	9.42877e-09	8.98634e-08
NM_024413	Plekhf1	92.278	4.54344	0.611116	7.43466	1.04836e-13	2.08683e-12
NM_024434	Lap3	248.718	1.55819	0.344478	4.52332	6.08765e-06	3.50225e-05
NM_024439	Vimp	128.377	4.24708	0.434727	9.76956	1.52118e-22	9.43008e-21
NM_024450	Scd3	687.647	1.90983	0.549026	3.47858	0.000504077	0.00193616
NM_024471	Lias	170.271	3.12496	0.355604	8.78775	1.52581e-18	5.4527e-17
NM_024474	Col26a1	14.586	3.48266	0.850697	4.09389	4.24195e-05	0.000207052
NM_025283	Mob4	1408.23	2.59195	0.40788	6.3547	2.08837e-10	2.58712e-09
NM_025292	Synj2bp	458.57	1.20643	0.318883	3.7833	0.000154764	0.000664937
NM_025301	Mrpl17	1338.02	1.93519	0.256122	7.55575	4.16461e-14	8.66468e-13
NM_025313	Atp5d	448.318	1.91471	0.384609	4.97833	6.41365e-07	4.43784e-06
NM_025332	Gtpbp8	38.549	2.19725	0.602157	3.64897	0.000263291	0.00108194
NM_025334	Txndc12	443.988	1.72018	0.303614	5.66566	1.46456e-08	1.34811e-07
NM_025346	Rmnd5b	182.234	1.9116	0.346567	5.5158	3.47189e-08	3.00462e-07
NM_025359	Tspan13	1136.86	1.95865	0.329238	5.94903	2.69731e-09	2.82529e-08
NM_025370	Aaed1	29.3628	4.00172	0.761407	5.25568	1.47477e-07	1.14221e-06
NM_025383	Necap2	609.566	2.13991	0.262356	8.15652	3.44802e-16	9.26878e-15
NM_025386	Fbxo36	305.141	1.28187	0.298519	4.2941	1.75406e-05	9.25989e-05
NM_025388	Ufc1	270.249	1.78459	0.378983	4.7089	2.49053e-06	1.55152e-05
NM_025407	Uqcrc1	232.38	3.90655	0.418074	9.34416	9.26223e-21	4.40463e-19
NM_025409	Ier3ip1	84.1689	2.19436	0.478469	4.58621	4.51354e-06	2.66427e-05
NM_025417	Commd4	162.44	2.7877	0.494231	5.64048	1.69574e-08	1.54591e-07
NM_025442	Alg5	98.4581	3.47033	0.610646	5.68305	1.3231e-08	1.22682e-07
NM_025448	Ssr2	366.636	1.0846	0.268385	4.04121	5.31767e-05	0.000253897
NM_025451	Camk2n1	26.298	3.00637	0.858372	3.50241	0.000461064	0.00178913
NM_025475	Haus2	360.071	4.59177	0.385207	11.9203	9.28147e-33	1.54909e-30
NM_025479	Mplkip	70.3506	2.44312	0.643087	3.79904	0.000145255	0.000628528
NM_025499	Eid3	8.95858	3.44953	1.05734	3.26246	0.00110449	0.00385809
NM_025509	Ostc	328.564	0.964445	0.298942	3.22619	0.00125448	0.00431909
NM_025512	Zfand1	112.805	3.09252	0.481615	6.42115	1.3525e-10	1.72186e-09
NM_025517	Rtca	542.663	1.2057	0.320268	3.76465	0.000166782	0.00071254
NM_025527	Srp19	403.078	0.745537	0.244163	3.05344	0.00226232	0.00727353
NM_025537	Tsfm	113.036	1.17756	0.390517	3.01538	0.0025666	0.00811945
NM_025547	Mterf3	458.877	1.43776	0.432806	3.32195	0.000893916	0.00320207
NM_025556	Coprs	312.258	1.24372	0.373149	3.33303	0.000859048	0.00309396
NM_025557	Pcp4l1	29.347	3.92309	1.02023	3.84528	0.000120413	0.00053056
NM_025567	Cyc1	237.642	1.67188	0.354343	4.71827	2.37863e-06	1.48669e-05
NM_025570	Mrpl20	57.5737	1.59033	0.43789	3.63181	0.000281436	0.00115214
NM_025572	2610528J11Rik	23.0155	2.33243	0.774858	3.01014	0.00261128	0.00824876
NM_025573	Srsf9	225.045	2.6999	0.357903	7.54367	4.56915e-14	9.45453e-13
NM_025586	Rpl15	285.403	0.884513	0.288979	3.06082	0.00220734	0.00712238
NM_025591	Fam136a	37.7794	4.23934	0.842509	5.0318	4.85884e-07	3.45487e-06
NM_025596	Prelid1	345.652	1.37827	0.326584	4.22027	2.44012e-05	0.000125162
NM_025613	Eid1	97.6118	2.61063	0.484496	5.38833	7.1115e-08	5.84467e-07
NM_025615	2810004N23Rik	626.199	1.29559	0.39278	3.29852	0.000971963	0.00345476
NM_025623	Nipsnap3b	103.056	5.21929	0.56528	9.23312	2.6287e-20	1.18823e-18
NM_025630	Aggf1	1554.45	1.25477	0.267133	4.69719	2.63768e-06	1.63581e-05
NM_025652	Gtf3a	187.117	0.929129	0.303321	3.06319	0.00218991	0.00707668
NM_025654	Rdm1	52.4467	2.03567	0.656239	3.10202	0.00192206	0.00630637
NM_025656	Gemin2	59.7827	2.18981	0.586006	3.73685	0.000186343	0.000788571
NM_025661	Ormdl3	157.194	4.50868	0.435528	10.3522	4.08891e-25	3.26854e-23
NM_025666	Ubr7	2147.82	0.874123	0.261201	3.34655	0.000818227	0.00296239
NM_025667	Tmem222	296.816	1.53064	0.443973	3.44759	0.00056561	0.00213768
NM_025676	Mcm8	439.159	1.15408	0.242822	4.75279	2.00628e-06	1.26753e-05
NM_025677	Tsen15	38.9527	4.17199	0.731433	5.70386	1.17124e-08	1.0968e-07
NM_025679	Sike1	497.648	3.58278	0.510471	7.01857	2.24157e-12	3.7167e-11
NM_025682	Pspc1	590.036	2.59576	0.326594	7.94797	1.8959e-15	4.6745e-14
NM_025685	Col27a1	48.127	2.60834	0.82554	3.15955	0.00158014	0.0053025
NM_025690	Sltm	95.884	2.76513	0.431747	6.40452	1.50844e-10	1.90601e-09
NM_025692	Uba5	155.772	2.34863	0.347475	6.75911	1.38839e-11	2.03935e-10
NM_025693	Tmem41a	44.4421	3.70024	0.699283	5.29147	1.21337e-07	9.53368e-07
NM_025696	Sorcs3	228.684	2.13885	0.31523	6.78504	1.16055e-11	1.72639e-10
NM_025698	Tmed7	540.638	1.8341	0.392129	4.67729	2.90693e-06	1.78747e-05
NM_025716	Spryd4	12.9811	4.6459	1.04011	4.46674	7.94188e-06	4.47242e-05
NM_025719	Nkapl	9.10068	4.88264	1.17974	4.13875	3.49205e-05	0.000173381
NM_025727	Klhl10	17.766	5.14175	1.03511	4.96736	6.78688e-07	4.67691e-06
NM_025772	Dtnbp1	56.763	2.26802	0.572146	3.96405	7.3688e-05	0.000339246
NM_025781	Tmem170	838.501	1.07686	0.31159	3.45601	0.000548244	0.00208168
NM_025785	Fbxo25	506.377	2.37461	0.249394	9.52153	1.70646e-21	8.90645e-20
NM_025788	Nacc1	3882.99	1.01183	0.243119	4.16187	3.15655e-05	0.000158015
NM_025793	Wdr45b	153.223	3.56276	0.491332	7.25122	4.13024e-13	7.59445e-12
NM_025794	Etfdh	247.122	4.41275	0.393221	11.2221	3.17748e-29	3.8919e-27
NM_025800	Ppp1r2	313.81	2.43152	0.343785	7.07281	1.51826e-12	2.60264e-11
NM_025815	Cpne8	53.8206	2.74926	0.684854	4.01437	5.96056e-05	0.000281059
NM_025824	Bzw1	2399.4	1.59105	0.385344	4.12892	3.64474e-05	0.000180196
NM_025825	Appbp2	1547.93	1.35756	0.308661	4.39824	1.09135e-05	5.99904e-05
NM_025827	Lonp2	434.758	1.21263	0.270604	4.48118	7.42303e-06	4.20048e-05
NM_025836	Plin3	202.054	1.11755	0.3251	3.43757	0.000586949	0.00221041
NM_025862	Acad8	30.3543	5.57539	0.880046	6.33534	2.36816e-10	2.90765e-09
NM_025864	Tmem206	295.277	2.38486	0.351628	6.78234	1.18248e-11	1.75214e-10
NM_025866	Cdca7	285.249	2.39377	0.299854	7.98313	1.42674e-15	3.58171e-14
NM_025868	Tmx2	114.493	3.99478	0.476987	8.37505	5.52026e-17	1.64395e-15
NM_025869	Dusp26	6.54701	4.27903	1.2293	3.48086	0.000499802	0.0019208
NM_025886	Rassf7	42.1165	4.77847	0.826761	5.77975	7.4811e-09	7.22792e-08
NM_025887	Rab5a	384.574	2.04418	0.404262	5.05658	4.26832e-07	3.04926e-06
NM_025903	Ifrd2	63.6264	2.9058	0.535037	5.43104	5.6028e-08	4.67044e-07
NM_025914	Actr6	253.56	1.78218	0.361982	4.92339	8.50591e-07	5.73658e-06
NM_025918	Ccdc43	41.4247	3.29607	0.55664	5.92137	3.19273e-09	3.3145e-08
NM_025922	Itpa	68.5524	2.32946	0.421844	5.5221	3.3498e-08	2.91557e-07
NM_025931	Ift27	108.329	3.48156	0.424208	8.20719	2.26419e-16	6.18498e-15
NM_025932	Syap1	362.817	3.87412	0.400181	9.68092	3.63447e-22	2.05971e-20
NM_025942	Ola1	351.37	2.38862	0.337752	7.07212	1.52583e-12	2.60971e-11
NM_025965	Ssr1	1282.64	0.879379	0.218185	4.03043	5.56739e-05	0.00026449
NM_025980	Nrarp	133.935	3.10383	0.383735	8.08849	6.041e-16	1.56839e-14
NM_025982	Tspan31	616.066	1.77715	0.229259	7.75173	9.0652e-15	2.08294e-13
NM_025994	Efhd2	40.9509	5.56785	0.927757	6.00141	1.95606e-09	2.10849e-08
NM_025998	Nkain1	1154.04	0.846953	0.256637	3.3002	0.000966157	0.00343895
NM_026001	Rnaseh2b	300.627	1.18751	0.345928	3.43282	0.000597336	0.00224452
NM_026005	2610301B20Rik	41.3601	3.93245	0.744174	5.28431	1.26176e-07	9.87307e-07
NM_026007	Eef1g	570.307	2.24306	0.344511	6.51085	7.47272e-11	9.87157e-10
NM_026017	Ctdnep1	542.125	1.15834	0.340316	3.40373	0.000664727	0.00246061
NM_026028	Ccdc77	599.621	2.1361	0.252948	8.44482	3.04504e-17	9.32422e-16
NM_026029	Glod4	229.252	1.45709	0.409817	3.55546	0.000377319	0.00149315
NM_026032	Lsm1	812.749	2.59663	0.308674	8.41219	4.02417e-17	1.22238e-15
NM_026033	Gatad1	452.296	1.17251	0.349971	3.35031	0.000807206	0.00292807
NM_026057	Zfp422	118.699	1.71365	0.342506	5.00328	5.63631e-07	3.94854e-06
NM_026058	Cers4	19.2654	2.33236	0.750372	3.10826	0.00188189	0.00620139
NM_026088	1700022I11Rik	4.73409	3.79668	1.26193	3.00863	0.00262425	0.00828158
NM_026091	1700037H04Rik	62.6662	1.82097	0.504577	3.6089	0.000307493	0.00124274
NM_026106	Dr1	1206	3.32131	0.400994	8.28269	1.20419e-16	3.42495e-15
NM_026115	Hat1	3291.15	1.54834	0.302967	5.11061	3.21128e-07	2.34711e-06
NM_026160	Map1lc3b	1027.39	0.672376	0.210851	3.18887	0.0014283	0.00485301
NM_026163	Pkp2	964.839	2.27903	0.393356	5.79381	6.88074e-09	6.69901e-08
NM_026165	Slc25a46	333.669	1.97115	0.405565	4.86025	1.17237e-06	7.70485e-06
NM_026172	Decr1	60.3463	3.47766	0.508595	6.83777	8.04367e-12	1.22412e-10
NM_026179	Abhd5	1941.99	1.24265	0.251294	4.94502	7.6136e-07	5.1901e-06
NM_026188	1700028P14Rik	111.881	3.37227	0.532679	6.33078	2.43932e-10	2.98536e-09
NM_026198	Tmem167b	856.99	3.53487	0.294508	12.0026	3.44266e-33	6.01001e-31
NM_026203	Ahi1	123.473	3.42561	0.377892	9.06506	1.2454e-19	5.12606e-18
NM_026219	Uqcrb	89.6323	1.70505	0.43276	3.93996	8.14966e-05	0.000372262
NM_026240	Gramd3	22.5789	4.2683	0.867849	4.91825	8.73194e-07	5.88119e-06
NM_026246	Mrpl49	121.471	1.23834	0.375253	3.3	0.000966833	0.00344055
NM_026250	Gin1	1074.28	2.91434	0.429656	6.78294	1.17751e-11	1.74649e-10
NM_026263	4930519G04Rik	85.6342	1.5802	0.519704	3.04057	0.00236131	0.00754705
NM_026267	Necap1	381.741	1.59853	0.295535	5.40894	6.33996e-08	5.25034e-07
NM_026275	Ube2r2	1136.96	2.46653	0.284633	8.66566	4.48921e-18	1.52875e-16
NM_026277	Nob1	119.806	2.24064	0.62319	3.59544	0.000323848	0.00130156
NM_026279	Bend5	684.907	0.796466	0.268413	2.96731	0.00300415	0.00933833
NM_026282	Spc24	1217.17	2.02072	0.289596	6.97772	3.00006e-12	4.88424e-11
NM_026305	Tceb2	404.086	1.98113	0.396018	5.00264	5.65516e-07	3.95809e-06
NM_026312	Pbdc1	206.897	1.79308	0.357406	5.01693	5.25028e-07	3.70717e-06
NM_026331	Slc25a37	238.608	5.93813	0.428023	13.8734	9.18368e-44	3.98519e-41
NM_026344	Dph2	72.5204	1.63499	0.520118	3.1435	0.00166941	0.00556518
NM_026347	Iah1	113.118	3.28181	0.456816	7.1841	6.76536e-13	1.19898e-11
NM_026353	Slc48a1	348.076	1.00636	0.283525	3.54946	0.000386018	0.00152321
NM_026362	Plgrkt	95.2867	3.77681	0.489778	7.71128	1.24558e-14	2.78613e-13
NM_026368	Caap1	61.3363	3.32202	0.597792	5.55716	2.74206e-08	2.42836e-07
NM_026369	Arpc5	949.406	1.34547	0.246482	5.45871	4.79603e-08	4.03557e-07
NM_026376	Plxnd1	251.078	1.74599	0.419927	4.15785	3.21263e-05	0.000160452
NM_026382	Snrnp48	602.466	0.94633	0.23638	4.00342	6.24326e-05	0.000292572
NM_026383	Pnrc2	216.203	4.67723	0.519866	8.997	2.31976e-19	9.27173e-18
NM_026386	Snx2	1050.77	1.05298	0.261148	4.03212	5.52752e-05	0.000262843
NM_026389	Poldip2	339.953	0.961307	0.249184	3.85782	0.000114401	0.000505986
NM_026421	Enoph1	200.794	1.14598	0.331295	3.45909	0.000542006	0.00206292
NM_026436	Tmem86a	146.884	4.02435	0.729193	5.51891	3.41116e-08	2.95712e-07
NM_026441	Pef1	110.7	1.37494	0.398076	3.45397	0.000552404	0.00209434
NM_026448	Klhl7	15.0416	3.75291	0.86487	4.33927	1.42954e-05	7.68836e-05
NM_026453	Mak16	64.1849	2.31055	0.517329	4.46631	7.95793e-06	4.4798e-05
NM_026485	Trabd	79.9959	6.00362	0.688618	8.71837	2.82243e-18	9.74252e-17
NM_026493	Cspp1	522.487	1.44161	0.303299	4.75309	2.00329e-06	1.26617e-05
NM_026494	Ppcs	20.3242	3.41459	0.754601	4.52503	6.03874e-06	3.47542e-05
NM_026496	Grhl2	267.871	1.17508	0.2644	4.44432	8.8169e-06	4.92501e-05
NM_026505	Bambi	40.5546	4.70455	0.738334	6.37184	1.86778e-10	2.32905e-09
NM_026526	N6amt2	81.4151	3.335	0.42965	7.76213	8.35178e-15	1.93364e-13
NM_026536	Atp5s	94.2561	1.75811	0.387288	4.53955	5.63739e-06	3.2605e-05
NM_026572	Gcsh	305.444	3.85683	0.334069	11.545	7.82543e-31	1.10049e-28
NM_026585	Fam21	2372.5	1.289	0.233494	5.5205	3.38033e-08	2.93602e-07
NM_026603	Denr	219.504	2.07422	0.352326	5.88722	3.92753e-09	3.99808e-08
NM_026605	Sympk	1043.21	1.17718	0.281462	4.18237	2.88486e-05	0.000145566
NM_026615	Urm1	37.8521	2.30126	0.530124	4.34098	1.41846e-05	7.63146e-05
NM_026623	Nudt21	83.509	1.96058	0.414164	4.73381	2.20346e-06	1.38412e-05
NM_026647	Zdhhc21	263.997	2.2448	0.358657	6.25889	3.87735e-10	4.64426e-09
NM_026648	Dnaaf1	46.4848	2.78617	0.687357	4.05346	5.04667e-05	0.0002421
NM_026667	Fam114a1	202.895	5.60915	0.439822	12.7532	2.99126e-37	7.97041e-35
NM_026675	Nudt22	61.128	1.85547	0.589685	3.14654	0.00165213	0.00551244
NM_026681	Ccdc88c	1140.34	1.40638	0.379145	3.70935	0.000207793	0.000869409
NM_026696	0610030E20Rik	697.973	1.42925	0.289251	4.94122	7.76347e-07	5.28515e-06
NM_026698	Tmem129	83.8817	2.37653	0.435452	5.45762	4.82567e-08	4.05708e-07
NM_026738	1110007C09Rik	93.701	2.05787	0.384575	5.35102	8.74619e-08	7.06956e-07
NM_026739	9530077C05Rik	10.39	3.30152	0.976021	3.38263	0.000717943	0.00264086
NM_026785	Ube2c	6784.8	1.34454	0.290142	4.63408	3.58535e-06	2.16088e-05
NM_026796	Smyd2	358.039	2.35117	0.343208	6.85058	7.35498e-12	1.12382e-10
NM_026818	Cilp2	80.2856	4.57028	0.601555	7.59743	3.02067e-14	6.38969e-13
NM_026821	Lurap1l	424.653	1.26287	0.403294	3.1314	0.00173977	0.00577441
NM_026832	Cgrrf1	64.4832	5.9983	0.730794	8.20792	2.25058e-16	6.17e-15
NM_026845	Ppil1	150.505	2.45928	0.529156	4.64755	3.35897e-06	2.03576e-05
NM_026855	Arv1	23.7956	2.20809	0.736094	2.99973	0.00270217	0.0084935
NM_026856	Zfp644	4461.07	2.87462	0.341268	8.42337	3.65811e-17	1.11341e-15
NM_026879	Chmp2b	681.478	1.34663	0.268137	5.02217	5.10902e-07	3.61752e-06
NM_026883	Fam216a	526.984	1.41926	0.284035	4.99679	5.82921e-07	4.06306e-06
NM_026899	Ssu72	898.229	0.927344	0.240342	3.85844	0.000114114	0.00050515
NM_026929	Chac1	1059.3	5.1306	0.479934	10.6902	1.13106e-26	1.0539e-24
NM_026951	Pex11g	94.9677	1.57568	0.400106	3.93816	8.21094e-05	0.000374836
NM_026967	Rhebl1	54.8182	1.75095	0.437983	3.99776	6.39453e-05	0.000298831
NM_026975	Bola1	324.754	1.3982	0.440344	3.17524	0.00149715	0.00505416
NM_026981	Dtwd1	66.6264	1.26559	0.411665	3.07432	0.00210981	0.00684258
NM_026993	Ddah1	285.044	3.21415	0.339337	9.47184	2.74963e-21	1.3967e-19
NM_027000	Gtpbp4	3458.75	0.913461	0.280384	3.2579	0.0011224	0.00391078
NM_027037	1700007K09Rik	7.63226	4.67694	1.19197	3.92371	8.71966e-05	0.000395562
NM_027041	1700003M02Rik	166.682	1.56894	0.375612	4.17703	2.95336e-05	0.000148616
NM_027052	Slc38a4	17.9779	2.69727	0.791678	3.40702	0.000656752	0.00243465
NM_027060	Btbd9	115.613	2.2039	0.391644	5.62732	1.83034e-08	1.65768e-07
NM_027085	Clic3	17.4746	2.23998	0.739531	3.02892	0.00245432	0.00781963
NM_027087	Krtap4-13	19.4787	5.4774	1.16817	4.68886	2.74734e-06	1.69758e-05
NM_027090	2300009A05Rik	32.256	2.66335	0.609119	4.37246	1.22855e-05	6.67592e-05
NM_027106	Avpi1	757.163	1.58586	0.443387	3.5767	0.000347964	0.0013882
NM_027107	Ten1	145.674	1.92645	0.413253	4.66167	3.13654e-06	1.91701e-05
NM_027132	Otop3	10.4991	3.43462	0.995975	3.4485	0.0005637	0.00213204
NM_027136	Ovca2	87.2477	2.40707	0.561244	4.28881	1.79631e-05	9.45757e-05
NM_027143	Khnyn	21.4489	6.12811	1.08671	5.63915	1.70889e-08	1.55696e-07
NM_027147	Enho	26.6612	3.59437	0.841921	4.26925	1.96131e-05	0.000102542
NM_027164	Lrrc27	182.663	1.5618	0.35926	4.34727	1.37844e-05	7.42665e-05
NM_027175	Ndufaf1	41.6935	2.80044	0.540243	5.18367	2.17562e-07	1.64068e-06
NM_027182	Trip13	429.984	1.60264	0.287134	5.58152	2.3842e-08	2.12632e-07
NM_027194	Tm2d2	241.71	1.13738	0.328925	3.45788	0.000544453	0.00207039
NM_027207	1600002K03Rik	10.7892	2.98155	0.98334	3.03206	0.0024289	0.00774841
NM_027219	Cdc42ep1	95.5614	4.80162	0.592329	8.10633	5.21698e-16	1.36613e-14
NM_027226	Fyttd1	134.057	1.70096	0.449379	3.78513	0.000153627	0.000660986
NM_027236	Eif1ad	661.682	0.841057	0.229211	3.66936	0.000243156	0.00100573
NM_027238	Ttc39b	994.339	0.985118	0.310029	3.17751	0.00148548	0.00501812
NM_027241	Polr3gl	30.7151	2.10391	0.607913	3.46088	0.000538407	0.00205203
NM_027258	Rnf157	80.5463	3.75254	0.627473	5.98039	2.22605e-09	2.37092e-08
NM_027264	Zfp715	1080.8	2.3575	0.340697	6.91963	4.52818e-12	7.16396e-11
NM_027269	Dnaaf2	168.286	3.1746	0.345769	9.18128	4.26015e-20	1.86465e-18
NM_027289	Nt5dc2	103.371	2.85503	0.542463	5.26309	1.41652e-07	1.10103e-06
NM_027293	Dopey2	3377.89	0.786255	0.217808	3.60986	0.000306365	0.00123917
NM_027295	Rab28	71.6728	3.17724	0.538122	5.90432	3.54112e-09	3.63395e-08
NM_027297	Prpf4	349.791	1.40294	0.348544	4.02515	5.69384e-05	0.00026957
NM_027309	Lysmd2	73.683	2.39644	0.431396	5.55509	2.77461e-08	2.45432e-07
NM_027315	Ube2q1	1350.38	0.994068	0.287349	3.45945	0.000541288	0.00206094
NM_027318	Znhit1	219.057	1.21848	0.2989	4.07654	4.57112e-05	0.000221597
NM_027324	Sfxn1	110.191	3.14245	0.50437	6.23045	4.65104e-10	5.49728e-09
NM_027327	2210013O21Rik	76.8145	1.21867	0.411329	2.96275	0.00304899	0.00946222
NM_027363	Chp2	39.278	1.99543	0.612159	3.25966	0.00111546	0.00388949
NM_027373	Afap1	2045.28	1.26028	0.359725	3.50347	0.000459245	0.00178298
NM_027402	Fndc5	40.3401	2.99671	0.745879	4.01768	5.8773e-05	0.000277477
NM_027404	Bag5	446.241	1.27861	0.396466	3.22502	0.00125962	0.00433518
NM_027421	Ints2	585.734	1.03279	0.318115	3.24659	0.00116795	0.00405181
NM_027432	Wdr77	48.1464	3.41403	0.537158	6.35574	2.07427e-10	2.57175e-09
NM_027434	Rprd1b	144.8	3.71362	0.447312	8.30208	1.02303e-16	2.94834e-15
NM_027439	Atp6ap2	576.12	1.94907	0.269544	7.23097	4.79553e-13	8.70186e-12
NM_027444	Bbx	1355.08	2.78986	0.462278	6.03503	1.58934e-09	1.73911e-08
NM_027450	Glipr2	34.3855	2.74808	0.690887	3.97762	6.96097e-05	0.000322425
NM_027453	Btf3l4	1050.97	1.15035	0.339205	3.3913	0.000695625	0.00256311
NM_027460	Slc25a33	50.1472	2.11506	0.553927	3.8183	0.000134376	0.00058697
NM_027472	5730455P16Rik	202.772	1.85126	0.462008	4.007	6.14961e-05	0.000288986
NM_027482	5730508B09Rik	114.146	2.66281	0.454263	5.86183	4.578e-09	4.59555e-08
NM_027485	Med26	2390.86	1.12084	0.218617	5.12695	2.94481e-07	2.16485e-06
NM_027487	Ccdc53	7.18969	4.5389	1.20466	3.76779	0.0001647	0.000704311
NM_027498	Sik3	556.846	3.12297	0.351263	8.89069	6.07333e-19	2.31182e-17
NM_027514	Pvr	763.763	5.07654	0.4985	10.1836	2.34609e-24	1.73817e-22
NM_027518	Gpr137c	571.867	0.92619	0.283686	3.26484	0.00109525	0.00383374
NM_027530	Rufy3	85.6265	1.93028	0.448737	4.30158	1.69586e-05	8.97759e-05
NM_027559	Cfap43	56.0005	2.16588	0.489922	4.42087	9.83064e-06	5.46515e-05
NM_027564	4921507P07Rik	33.6991	2.3301	0.648967	3.59048	0.000330075	0.00132414
NM_027622	Tex19.2	62.0289	1.75218	0.552509	3.17131	0.00151751	0.00511156
NM_027706	Nbas	1378.09	1.37584	0.215239	6.39216	1.63562e-10	2.05134e-09
NM_027744	Noxred1	19.1671	2.24479	0.711884	3.15331	0.00161428	0.00539917
NM_027760	Rassf8	107.901	2.18237	0.482038	4.52737	5.9721e-06	3.43968e-05
NM_027764	Rcbtb1	829.453	2.35628	0.228595	10.3077	6.50679e-25	5.09408e-23
NM_027860	0610010F05Rik	393.487	1.56581	0.340208	4.60252	4.17412e-06	2.47837e-05
NM_027886	Stk11ip	75.476	1.62656	0.470826	3.4547	0.000550903	0.00209021
NM_027895	Ulk3	46.5047	3.36801	0.574621	5.86126	4.5936e-09	4.60816e-08
NM_027909	C2cd2l	78.1272	2.4571	0.509678	4.82089	1.4292e-06	9.26448e-06
NM_027920	March8	435.251	2.23324	0.26057	8.5706	1.02946e-17	3.34806e-16
NM_027924	Pdgfd	20.439	4.50097	0.877253	5.13075	2.8859e-07	2.12669e-06
NM_027934	Rnf180	319.077	0.848253	0.264584	3.20599	0.00134599	0.00460011
NM_027937	Caskin1	131.147	2.68611	0.443666	6.05435	1.40988e-09	1.55733e-08
NM_027963	Cfap52	22.8682	3.28638	0.845861	3.88525	0.000102225	0.00045682
NM_027975	Fam83d	404.232	1.50757	0.343999	4.38248	1.17337e-05	6.40357e-05
NM_027979	Chit1	32.1738	3.37134	1.00272	3.36218	0.000773291	0.00282214
NM_027992	Tmem106b	304.222	2.45854	0.400738	6.13502	8.51476e-10	9.66533e-09
NM_028005	2310047M10Rik	16.4522	3.43801	0.925117	3.7163	0.000202165	0.0008482
NM_028014	2310067B10Rik	164.826	1.20617	0.290398	4.15349	3.27436e-05	0.00016332
NM_028018	Ist1	446.54	1.08954	0.277182	3.93076	8.4679e-05	0.000385292
NM_028024	Nkiras2	62.3691	2.58962	0.529647	4.88934	1.01175e-06	6.72787e-06
NM_028029	Dnmbp	812.452	2.2564	0.355398	6.34894	2.1681e-10	2.67717e-09
NM_028041	Ddx54	187.625	2.13577	0.467092	4.57249	4.8196e-06	2.82626e-05
NM_028057	Cyb5r1	18.7984	4.5601	0.973024	4.68652	2.77884e-06	1.71495e-05
NM_028058	Fundc1	409.2	2.48206	0.499056	4.97351	6.57509e-07	4.54207e-06
NM_028070	Alkbh4	65.3987	1.80351	0.598145	3.01517	0.00256835	0.00812332
NM_028075	Tnfrsf13c	48.7824	3.67552	0.661856	5.55335	2.80249e-08	2.47466e-07
NM_028076	Tmub2	53.6298	2.78718	0.697853	3.99394	6.49848e-05	0.00030313
NM_028099	Dusp11	546.002	2.26337	0.309891	7.30374	2.79882e-13	5.26096e-12
NM_028102	Ddhd2	621.319	1.03647	0.254068	4.0795	4.51322e-05	0.000218962
NM_028104	Ppp1r14d	35.2009	2.10039	0.554288	3.78935	0.000151041	0.000651337
NM_028115	Trub1	61.9161	3.62294	0.565553	6.406	1.49383e-10	1.89226e-09
NM_028118	Wdsub1	113.511	1.67543	0.359582	4.65938	3.17166e-06	1.93459e-05
NM_028127	Frmd6	144.488	2.5935	0.511854	5.06686	4.04421e-07	2.90007e-06
NM_028145	Klhl35	12.4745	2.98558	0.872428	3.42215	0.000621288	0.00232302
NM_028184	Oraov1	87.1737	2.84378	0.47649	5.96818	2.39908e-09	2.53918e-08
NM_028207	Dusp3	12.0527	4.83775	1.20624	4.0106	6.05637e-05	0.000285222
NM_028230	Shmt2	30.1936	2.74909	0.787083	3.49276	0.000478064	0.0018466
NM_028234	Rbm33	2669	0.702057	0.220197	3.18831	0.00143105	0.0048613
NM_028266	Col16a1	24.7458	5.71611	0.967881	5.90579	3.50953e-09	3.60641e-08
NM_028283	Uaca	780.667	3.97886	0.464976	8.55715	1.15697e-17	3.73873e-16
NM_028304	Pus10	146.675	3.39182	0.425898	7.96392	1.66671e-15	4.14984e-14
NM_028326	Zfp618	1114.09	1.93888	0.238492	8.12978	4.30086e-16	1.14e-14
NM_028335	Zfp248	324.483	2.84606	0.368886	7.71528	1.20714e-14	2.71615e-13
NM_028339	Tmx1	341.395	2.95508	0.335467	8.80886	1.2642e-18	4.54993e-17
NM_028372	Mblac2	598.314	3.40459	0.468225	7.27127	3.56123e-13	6.5961e-12
NM_028385	Setd5	2338.27	1.18244	0.26843	4.40503	1.05769e-05	5.83094e-05
NM_028416	Kremen2	5.741	3.58816	1.1601	3.09296	0.00198168	0.00647668
NM_028431	Pmpcb	594.625	0.897786	0.23191	3.87127	0.000108268	0.000481234
NM_028448	Cenpv	313.018	1.17527	0.276031	4.25774	2.06506e-05	0.000107559
NM_028451	Larp1	1822.2	2.35485	0.280806	8.38604	5.02784e-17	1.50915e-15
NM_028472	Bmper	93.2069	2.00144	0.470507	4.2538	2.1017e-05	0.000109242
NM_028480	Ceacam5	154.708	1.59147	0.499651	3.18516	0.00144674	0.00490689
NM_028518	Col20a1	25.1012	4.44083	0.849953	5.2248	1.74342e-07	1.33868e-06
NM_028544	Rasip1	49.6864	5.30654	0.698755	7.59428	3.09507e-14	6.52888e-13
NM_028567	1700094D03Rik	23.7891	2.57053	0.863193	2.97794	0.00290197	0.00906337
NM_028589	1700125H20Rik	9.0658	4.92306	1.17287	4.19743	2.69961e-05	0.000137221
NM_028593	Cybrd1	10.4305	2.94821	0.912412	3.23123	0.00123261	0.00424991
NM_028598	Rec114	116.269	1.74213	0.428443	4.0662	4.77868e-05	0.000230628
NM_028608	Glipr1	50.0378	4.37506	0.707242	6.18609	6.16747e-10	7.1505e-09
NM_028614	Ppp2r1b	851.769	1.12726	0.350872	3.21273	0.00131479	0.0045036
NM_028627	Psd	61.2073	3.93394	0.688697	5.71215	1.1156e-08	1.0498e-07
NM_028633	Haus7	180.121	2.43867	0.408997	5.96255	2.48334e-09	2.62287e-08
NM_028637	1110034G24Rik	31.647	2.12232	0.651091	3.25964	0.00111553	0.00388949
NM_028639	Ttc7	431.676	1.88526	0.301559	6.25172	4.05949e-10	4.82815e-09
NM_028680	Ift57	119.244	1.2124	0.404739	2.99551	0.00273985	0.00860301
NM_028705	Herc3	1860.65	1.19082	0.245575	4.84911	1.24018e-06	8.1294e-06
NM_028718	Traf3ip1	668.888	1.21523	0.330002	3.68251	0.00023095	0.000960218
NM_028724	Rin2	127.863	2.48854	0.560257	4.44179	8.92148e-06	4.97976e-05
NM_028725	Sdr42e1	54.6785	2.21616	0.531347	4.17083	3.03499e-05	0.000152432
NM_028749	Npl	11.6059	5.27086	1.14717	4.59467	4.33443e-06	2.56453e-05
NM_028763	Cbx6	34.5229	6.75765	1.04845	6.44537	1.15322e-10	1.47682e-09
NM_028766	Tmem43	346	1.40888	0.304175	4.63182	3.62469e-06	2.18027e-05
NM_028769	Syvn1	434.966	1.0954	0.311782	3.51335	0.0004425	0.00172458
NM_028780	Tm9sf1	204.292	2.78352	0.372578	7.47097	7.96063e-14	1.6014e-12
NM_028785	Dock8	286.269	1.85134	0.326705	5.66671	1.45564e-08	1.34234e-07
NM_028787	Slc35f5	213.199	1.63639	0.336045	4.86955	1.11855e-06	7.3735e-06
NM_028799	Tgm5	4.5983	3.74088	1.26712	2.95227	0.00315442	0.00974362
NM_028812	Gtf2e1	279.88	1.31418	0.414222	3.17265	0.00151054	0.00509325
NM_028821	Dnal1	246.922	1.5232	0.310912	4.89911	9.62708e-07	6.43698e-06
NM_028829	Paqr8	274.258	1.20391	0.340418	3.53656	0.000405374	0.00159544
NM_028833	Iqce	64.6123	1.76016	0.493531	3.56647	0.000361823	0.00143772
NM_028839	Tmem110	132.362	2.0157	0.503732	4.00154	6.29312e-05	0.000294636
NM_028841	Tspan17	80.2755	1.8021	0.393033	4.58512	4.53719e-06	2.67719e-05
NM_028863	Isca2	143.151	2.1427	0.397365	5.39227	6.95749e-08	5.72429e-07
NM_028874	Snx19	271.311	1.28094	0.303668	4.21821	2.46246e-05	0.000126223
NM_028881	Crtc2	180.38	2.01754	0.368595	5.4736	4.40983e-08	3.73786e-07
NM_028883	Tldc1	347.997	2.00931	0.299904	6.69987	2.08609e-11	2.97219e-10
NM_028890	4931414P19Rik	48.6492	4.40213	0.632394	6.96106	3.37723e-12	5.45095e-11
NM_028894	Lonrf3	3942.65	1.48938	0.222981	6.67941	2.39901e-11	3.38312e-10
NM_028898	Rptor	720.913	2.27732	0.385735	5.90384	3.55129e-09	3.63947e-08
NM_028900	Gcc1	320.275	1.25863	0.261944	4.80497	1.54775e-06	9.96494e-06
NM_028906	Dpp8	176.545	2.06698	0.341177	6.05838	1.37501e-09	1.52324e-08
NM_028908	Map10	78.6283	2.14716	0.50908	4.21773	2.46773e-05	0.00012645
NM_028910	Olfr701	417.575	2.63727	0.311026	8.47925	2.26648e-17	7.03952e-16
NM_028914	4933406J08Rik	27.1847	1.94076	0.623571	3.11232	0.0018562	0.00612204
NM_028918	Ttc25	29.9834	4.06705	0.83455	4.87334	1.09725e-06	7.24252e-06
NM_028932	Eaf1	1256.46	1.64722	0.275532	5.97831	2.25464e-09	2.398e-08
NM_028937	Sohlh2	595.841	3.75962	0.293854	12.7942	1.76763e-37	4.97161e-35
NM_028958	Taf7l	112.34	8.31912	0.965239	8.61871	6.77124e-18	2.27023e-16
NM_028959	Cep72	267.876	1.84141	0.381197	4.83059	1.36132e-06	8.87372e-06
NM_028976	Gorasp1	54.9052	1.7188	0.530422	3.24044	0.00119344	0.00412797
NM_028982	8430419L09Rik	482.786	0.968654	0.267474	3.62149	0.000292908	0.00119172
NM_029021	Ocstamp	15.4131	2.67045	0.794893	3.35951	0.00078082	0.00284459
NM_029022	Scrn3	456.708	1.10834	0.267266	4.14696	3.36925e-05	0.000167668
NM_029035	Spsb1	58.573	3.49503	0.624771	5.5941	2.21769e-08	1.98716e-07
NM_029036	S100pbp	444.234	1.04082	0.325864	3.19404	0.00140299	0.00477557
NM_029045	4930432K21Rik	77.7664	1.38313	0.399341	3.46353	0.000533128	0.00203395
NM_029091	Klc4	96.5758	2.22204	0.57743	3.84816	0.00011901	0.000524985
NM_029102	Glt8d2	9.3382	3.0143	0.995334	3.02843	0.00245829	0.00783065
NM_029148	Tmx4	1042.95	3.1423	0.377271	8.32903	8.15042e-17	2.3669e-15
NM_029153	Scamp1	8028.92	1.93336	0.328711	5.88163	4.06241e-09	4.12157e-08
NM_029182	Rasd2	492.354	2.96121	0.334429	8.85454	8.40259e-19	3.14331e-17
NM_029195	Ccdc146	223.884	2.27351	0.314764	7.2229	5.08892e-13	9.16852e-12
NM_029210	Sv2c	175.503	4.46591	0.440796	10.1315	4.00529e-24	2.88942e-22
NM_029232	Tmco5b	50.0763	1.93713	0.55312	3.50219	0.000461442	0.00179006
NM_029250	Etnk1	4242.41	1.3879	0.210257	6.60094	4.08546e-11	5.6103e-10
NM_029254	Spdya	23.4967	4.38321	0.932011	4.70296	2.5642e-06	1.59415e-05
NM_029327	Lyrm7	282.908	1.9883	0.443142	4.48683	7.22898e-06	4.09984e-05
NM_029343	Spata9	5.4864	3.84325	1.26563	3.03663	0.00239236	0.00764146
NM_029362	Chmp4b	158.645	2.10191	0.331087	6.34849	2.1744e-10	2.68276e-09
NM_029364	Gns	928.993	1.35632	0.31051	4.36803	1.25374e-05	6.79579e-05
NM_029376	Speer4a	116.838	1.2892	0.409033	3.15183	0.00162252	0.00542435
NM_029394	Snx24	29.8309	1.88424	0.56043	3.36214	0.000773422	0.00282214
NM_029418	9130401M01Rik	229.369	1.704	0.370625	4.59765	4.27273e-06	2.53098e-05
NM_029427	Pnpla5	68.7891	2.17672	0.640196	3.40008	0.000673659	0.00249124
NM_029428	Adad2	106.699	2.95785	0.435577	6.79065	1.11632e-11	1.66375e-10
NM_029431	Them4	117.701	1.07006	0.350133	3.05616	0.00224194	0.00721872
NM_029441	Cdyl2	386.419	0.980754	0.31636	3.10012	0.0019344	0.00633727
NM_029482	4930579G24Rik	38.406	4.04191	0.653425	6.18573	6.18153e-10	7.16133e-09
NM_029522	Gpsm2	485.526	1.31997	0.263915	5.00148	5.68925e-07	3.97829e-06
NM_029557	Tsen54	69.5362	1.85871	0.571847	3.25036	0.00115259	0.00400492
NM_029571	Kti12	147.4	1.59467	0.395971	4.02724	5.64353e-05	0.000267522
NM_029573	Idh3a	1045.57	0.643241	0.215837	2.98021	0.0028805	0.00900556
NM_029606	Cep112	140.787	2.15444	0.407143	5.29162	1.21236e-07	9.53069e-07
NM_029623	3110002H16Rik	322.917	1.20886	0.258249	4.68099	2.85496e-06	1.75836e-05
NM_029624	Lmf1	268.275	1.36632	0.425624	3.21016	0.00132663	0.00454007
NM_029658	Fam101b	153.531	1.96683	0.350382	5.61339	1.98401e-08	1.78619e-07
NM_029665	Ipo11	961.157	2.72003	0.253662	10.7231	7.93246e-27	7.49277e-25
NM_029679	Fam65b	375.658	1.44169	0.396096	3.63976	0.000272895	0.0011199
NM_029701	Spcs3	948.41	2.05352	0.382876	5.36341	8.16641e-08	6.64691e-07
NM_029721	Snx27	447.128	2.27407	0.25968	8.75721	2.00144e-18	7.00412e-17
NM_029735	Eprs	7663.38	1.79947	0.190541	9.44404	3.58674e-21	1.79787e-19
NM_029742	Klhdc10	2218.63	1.33751	0.218931	6.10929	1.00076e-09	1.12672e-08
NM_029746	Cog2	193.128	3.8456	0.357451	10.7584	5.40932e-27	5.30043e-25
NM_029748	Tmem234	106.727	2.61373	0.416034	6.28249	3.33197e-10	4.01634e-09
NM_029752	Bri3bp	97.632	2.59242	0.52099	4.97596	6.49255e-07	4.48834e-06
NM_029770	Unc5b	278.948	4.31773	0.60318	7.15828	8.16982e-13	1.43449e-11
NM_029793	Golga1	108.478	2.34574	0.39092	6.00055	1.96649e-09	2.11673e-08
NM_029802	Arfip2	227.854	1.15964	0.308622	3.75746	0.000171648	0.000731891
NM_029804	Hnrnpm	50.0582	1.47033	0.456144	3.22338	0.00126686	0.00435812
NM_029832	Ddrgk1	179.625	1.01645	0.337814	3.0089	0.00262192	0.00827724
NM_029834	Ppp1r12c	99.7642	3.56199	0.510683	6.97495	3.05976e-12	4.95433e-11
NM_029839	Trub1	23.8409	2.45431	0.712459	3.44484	0.000571391	0.00215663
NM_029840	Tstd3	123.643	3.46249	0.631936	5.47918	4.27291e-08	3.63773e-07
NM_029841	2510039O18Rik	941.764	3.68719	0.366842	10.0512	9.07794e-24	6.26708e-22
NM_029850	Bcl7a	187.071	2.84813	0.393086	7.24558	4.30606e-13	7.89861e-12
NM_029870	Crebrf	1958.49	1.30384	0.346715	3.76057	0.00016953	0.000723467
NM_029878	Tbcd	570.559	1.52571	0.245159	6.22335	4.86665e-10	5.73872e-09
NM_029884	Hgsnat	130.518	1.40948	0.364484	3.86707	0.000110151	0.000488743
NM_029929	Vps33a	152.81	1.79987	0.499857	3.60078	0.000317267	0.00127714
NM_029934	Mboat7	420.587	1.01275	0.328206	3.08573	0.00203052	0.00662218
NM_029936	Ddx10	1827.15	0.957374	0.234131	4.08906	4.33128e-05	0.000210912
NM_029988	Pigh	81.3564	1.79624	0.604557	2.97118	0.00296662	0.00923867
NM_030013	Cyp20a1	75.9218	1.69058	0.42624	3.96627	7.30071e-05	0.00033652
NM_030026	Mccc2	36.9148	2.17158	0.571503	3.79978	0.000144826	0.000627027
NM_030096	Ddx52	778.62	0.758605	0.244251	3.10584	0.0018974	0.00623897
NM_030110	Micu3	210.749	1.67225	0.399788	4.18284	2.87894e-05	0.000145364
NM_030132	Utp23	32.0692	2.85017	0.731232	3.89776	9.7085e-05	0.000435606
NM_030165	Csgalnact2	55.5649	4.82834	0.737179	6.54975	5.7634e-11	7.75328e-10
NM_030176	Spata2l	21.9288	4.30655	0.863705	4.98614	6.15987e-07	4.28174e-06
NM_030178	Brpf1	491.173	1.20568	0.272814	4.41943	9.89622e-06	5.49758e-05
NM_030189	Stpg1	101.39	2.70221	0.52139	5.18271	2.18686e-07	1.64834e-06
NM_030199	Zfp623	195.531	2.08424	0.34959	5.96194	2.49263e-09	2.62721e-08
NM_030207	Sfi1	142.043	1.25382	0.356357	3.51842	0.000434125	0.00169455
NM_030210	Aacs	33.4696	3.16077	0.754164	4.19109	2.77612e-05	0.000140639
NM_030215	Wrnip1	508.099	0.764492	0.245258	3.1171	0.0018264	0.0060303
NM_030238	Dync1h1	3418.57	2.00858	0.292511	6.86669	6.57104e-12	1.01218e-10
NM_030240	Pagr1a	273.952	1.43705	0.381693	3.76494	0.000166588	0.000711912
NM_030256	Bcl9l	62.1909	3.37359	0.628803	5.36509	8.09102e-08	6.59262e-07
NM_030257	Lysmd3	559.441	2.05338	0.420678	4.88112	1.05487e-06	6.99626e-06
NM_030261	Sesn3	724.282	1.71499	0.286156	5.9932	2.05748e-09	2.20997e-08
NM_030556	Slc19a3	252.231	4.9288	0.467279	10.5479	5.19623e-26	4.61523e-24
NM_030566	Rabep2	19.4461	2.52697	0.772473	3.27127	0.00107065	0.00375977
NM_030595	Nbea	484.741	2.3101	0.298975	7.72672	1.10353e-14	2.50529e-13
NM_030609	Hist1h1a	1961.28	1.34134	0.398267	3.36795	0.000757298	0.00277019
NM_030679	Myh1	66.5064	2.78289	0.615607	4.52055	6.16782e-06	3.54568e-05
NM_030685	Serp1	1683.37	2.63595	0.291536	9.04161	1.54386e-19	6.26956e-18
NM_030687	Slco1a4	191.306	1.44967	0.470858	3.07878	0.00207849	0.00675977
NM_030692	Sacm1l	394.991	1.46649	0.329035	4.45695	8.31342e-06	4.66436e-05
NM_030693	Atf5	227.754	3.4415	0.482051	7.13929	9.38162e-13	1.63779e-11
NM_030697	Kank3	18.2827	5.11536	1.00364	5.0968	3.45451e-07	2.50799e-06
NM_030705	Mesdc1	184.331	2.52193	0.618927	4.07467	4.60793e-05	0.000223167
NM_030711	Erap1	30.6857	3.83378	0.659835	5.81021	6.23957e-09	6.11397e-08
NM_030715	Polh	285.225	2.46344	0.268377	9.17902	4.35038e-20	1.89866e-18
NM_030729	Nckipsd	21.1212	2.91577	0.832024	3.50444	0.000457575	0.0017774
NM_030731	Trim23	938.758	1.00261	0.320012	3.13304	0.00173004	0.00574691
NM_030749	Sil1	781.067	1.72222	0.397743	4.32999	1.49115e-05	7.97448e-05
NM_030750	Sgpp1	694.042	3.11473	0.405974	7.67224	1.69019e-14	3.70962e-13
NM_031166	Id4	9.88303	4.16442	1.09022	3.8198	0.000133559	0.00058357
NM_031170	Krt8	44.2335	2.43896	0.660092	3.69488	0.000219993	0.000917422
NM_031174	Dscam	580.582	1.03568	0.257083	4.02856	5.6119e-05	0.000266189
NM_031176	Tnxb	33.3174	3.6425	0.641266	5.68017	1.34562e-08	1.24618e-07
NM_031182	Tfap4	137.672	1.67675	0.336455	4.98357	6.24205e-07	4.33292e-06
NM_031183	Sp6	52.0147	5.98353	0.763989	7.83195	4.80362e-15	1.13288e-13
NM_031184	Glis2	46.7247	3.74496	0.623227	6.00899	1.86681e-09	2.02234e-08
NM_031199	Tgfa	483.601	1.71277	0.324863	5.27228	1.34742e-07	1.05163e-06
NM_031259	Nxf2	12.3385	4.45772	1.06605	4.18154	2.89546e-05	0.000145955
NM_031260	Mov10l1	1238.42	2.9267	0.27528	10.6317	2.12231e-26	1.93016e-24
NM_031368	Bglap3	148.961	8.67771	0.950444	9.13017	6.83911e-20	2.91629e-18
NM_031373	Ogfr	51.1215	2.98266	0.605857	4.92304	8.52096e-07	5.74418e-06
NM_031374	Tex15	7519.58	1.22449	0.400871	3.05456	0.00225389	0.00725255
NM_031375	Ngrn	554.851	0.960405	0.249033	3.85653	0.000115007	0.000508361
NM_031377	Pramel1	171.397	5.27988	0.414368	12.742	3.45319e-37	9.04258e-35
NM_031380	Fstl3	24.0546	2.18798	0.732866	2.9855	0.00283111	0.00885479
NM_031392	Wdr6	55.334	2.4618	0.456529	5.39242	6.95137e-08	5.72235e-07
NM_031396	Cnnm1	179.09	6.37912	0.527481	12.0935	1.14244e-33	2.11603e-31
NM_031403	Dbr1	222.266	2.19746	0.4127	5.3246	1.01175e-07	8.10893e-07
NM_031405	Srrt	95.5561	1.88318	0.442952	4.25143	2.12409e-05	0.000110255
NM_031408	Gigyf1	264.764	3.61316	0.442099	8.17274	3.01458e-16	8.1614e-15
NM_031842	Smarcd1	153.727	3.17454	0.379206	8.37154	5.68719e-17	1.68705e-15
NM_031871	Ghdc	237.204	1.30146	0.29261	4.44776	8.67724e-06	4.85326e-05
NM_033074	Tars	1212.6	1.20898	0.225615	5.3586	8.38673e-08	6.81164e-07
NM_033077	D1Pas1	89.1242	3.47723	0.507924	6.84597	7.59619e-12	1.15951e-10
NM_033217	Ngfr	18.3979	3.05878	0.935452	3.26984	0.00107609	0.00377624
NM_033218	Srebf2	434.914	1.79776	0.383706	4.68525	2.79614e-06	1.7244e-05
NM_033270	E2f6	138.213	1.60637	0.406014	3.95645	7.6073e-05	0.000348641
NM_033325	Loxl2	15.4063	4.4425	1.03063	4.31048	1.62897e-05	8.65062e-05
NM_033371	Ppp1r16a	13.4691	3.44515	0.943065	3.65314	0.000259048	0.00106566
NM_033476	Tfcp2	271.359	1.05675	0.288337	3.665	0.000247343	0.00102166
NM_033561	Eif4h	2730.94	1.12715	0.268092	4.20433	2.61852e-05	0.000133457
NM_033564	Mpv17l	189.884	3.09835	0.463732	6.68135	2.36756e-11	3.35344e-10
NM_033565	Aff4	1535.78	1.92131	0.286341	6.70988	1.94786e-11	2.79623e-10
NM_033570	Cnnm4	825.667	0.961369	0.225631	4.26079	2.03704e-05	0.000106318
NM_033571	Fkbp6	267.251	3.14342	0.29426	10.6825	1.2295e-26	1.13864e-24
NM_033572	Wbscr16	32.4896	2.73465	0.641239	4.26463	2.00233e-05	0.00010465
NM_033573	Prcc	261.857	2.55823	0.353972	7.22722	4.92979e-13	8.90294e-12
NM_033577	Pcdhgb5	15.2264	3.85655	1.19348	3.23134	0.0012321	0.00424911
NM_033585	Pcdhga2	8.22716	3.88136	1.27643	3.0408	0.00235952	0.00754452
NM_033596	Hist2h4	100.603	4.05084	0.4591	8.82343	1.11005e-18	4.05274e-17
NM_033602	Peli2	512.501	3.46035	0.33548	10.3146	6.05067e-25	4.76154e-23
NM_033617	Atp6v0b	312.751	0.898653	0.289913	3.09973	0.00193697	0.00634254
NM_053008	Olig3	15.6475	4.78055	1.04992	4.55324	5.28256e-06	3.06695e-05
NM_053014	Agpat3	463.744	1.21891	0.302021	4.03584	5.44068e-05	0.0002592
NM_053068	Chrac1	32.8036	2.43651	0.60458	4.03009	5.57545e-05	0.000264707
NM_053079	Slc15a1	99.7391	3.07996	0.540203	5.70148	1.1877e-08	1.1094e-07
NM_053089	Naa15	1087.97	1.03087	0.255067	4.04157	5.30954e-05	0.000253589
NM_053091	Cox4i2	94.3257	3.47933	0.634851	5.48055	4.24013e-08	3.61387e-07
NM_053100	Trim8	69.2372	2.30231	0.437054	5.26779	1.38074e-07	1.07597e-06
NM_053103	Entpd7	21.8922	2.94816	0.842465	3.49945	0.000466217	0.00180405
NM_053163	Mrpl36	284.346	1.85981	0.352088	5.28222	1.27631e-07	9.98178e-07
NM_053170	Trim33	99.9293	1.21533	0.368344	3.29945	0.000968749	0.00344656
NM_053173	Kifc5b	115.977	1.63498	0.494535	3.3061	0.000946046	0.00337369
NM_053196	Sfxn2	90.8334	1.99824	0.502441	3.97705	6.9774e-05	0.000323088
NM_053216	1700102P08Rik	29.7708	4.92617	0.835092	5.89896	3.65797e-09	3.74375e-08
NM_053247	Lyve1	40.4378	3.2356	0.855341	3.78282	0.000155063	0.000666035
NM_053272	Dhcr24	669.548	4.46421	0.414	10.7831	4.13672e-27	4.13345e-25
NM_053273	Ttyh2	161.086	2.83195	0.431227	6.56719	5.12733e-11	6.92212e-10
NM_054041	Antxr1	255.599	1.73034	0.36334	4.76231	1.91387e-06	1.21318e-05
NM_054044	Adgra3	57.0148	3.29849	0.669642	4.92574	8.40406e-07	5.67041e-06
NM_054049	Osr2	52.7998	1.67782	0.513154	3.26963	0.00107689	0.0037782
NM_054055	Slc13a3	64.2564	6.26274	0.762482	8.21362	2.1461e-16	5.91559e-15
NM_054056	Pawr	166.601	1.31909	0.318129	4.1464	3.37739e-05	0.000167963
NM_054064	Psg29	14.2597	5.48572	1.13694	4.825	1.40001e-06	9.10246e-06
NM_054087	Slc19a2	35.6687	2.21108	0.566994	3.89965	9.63325e-05	0.000432613
NM_054089	Tgs1	570.933	1.46488	0.302099	4.84901	1.2408e-06	8.13e-06
NM_054095	Necab2	281.17	1.66165	0.338017	4.91587	8.83875e-07	5.94785e-06
NM_054097	Pip4k2c	1526.97	1.81774	0.288778	6.29457	3.08255e-10	3.73347e-09
NM_054103	Stk33	26.23	3.4856	0.726759	4.79609	1.61796e-06	1.03695e-05
NM_058214	Recql4	289.306	1.23223	0.411481	2.99463	0.00274778	0.00862257
NM_080436	Rdh1	19.1799	5.883	1.11085	5.29593	1.18411e-07	9.3376e-07
NM_080445	B3galt6	72.5225	2.95953	0.572891	5.16596	2.39212e-07	1.78797e-06
NM_080448	Srgap3	116.04	4.42577	0.516655	8.56621	1.06946e-17	3.47073e-16
NM_080470	Smc1b	4422.64	2.81644	0.256003	11.0016	3.75525e-28	4.32081e-26
NM_080553	Itpr3	147.108	1.7126	0.461798	3.70854	0.000208456	0.000871706
NM_080636	Hars2	51.0581	5.3904	0.767331	7.02487	2.14272e-12	3.57459e-11
NM_080793	Setd7	85.8413	3.19872	0.744397	4.29706	1.73077e-05	9.15281e-05
NM_080850	Pask	216.031	1.48082	0.298767	4.95645	7.17937e-07	4.92948e-06
NM_080855	Zcchc14	2273.47	1.10667	0.346932	3.18987	0.00142339	0.00483743
NM_130449	Colec12	45.9191	2.56353	0.567755	4.51521	6.32548e-06	3.62944e-05
NM_130859	Card10	106.265	4.24143	0.553444	7.66371	1.80644e-14	3.94766e-13
NM_130860	Cdk9	165.014	2.14782	0.365326	5.87918	4.12305e-09	4.17472e-08
NM_130864	Acaa1a	42.9546	2.47719	0.652863	3.79434	0.000148035	0.000639462
NM_130884	Idh3b	479.158	1.05464	0.345965	3.04841	0.00230058	0.00737466
NM_133184	Slc5a4a	34.6437	3.25673	0.614621	5.29875	1.16598e-07	9.21375e-07
NM_133185	Rogdi	254.806	1.78782	0.377816	4.73198	2.22339e-06	1.39425e-05
NM_133196	Cstf2	2497.92	2.01807	0.39002	5.17427	2.288e-07	1.71775e-06
NM_133197	Mcf2	448.518	3.14017	0.276585	11.3533	7.13877e-30	9.34686e-28
NM_133204	Zscan5b	38.5296	3.69615	0.692934	5.33406	9.60392e-08	7.70953e-07
NM_133216	Xpnpep1	126.744	3.38241	0.491215	6.88581	5.74611e-12	8.92623e-11
NM_133222	Adgrl4	128.717	3.51644	0.415765	8.45777	2.7253e-17	8.37891e-16
NM_133223	Rac3	182.593	1.32929	0.33167	4.00786	6.12711e-05	0.000288018
NM_133231	Rfxap	558.098	1.71371	0.294495	5.81914	5.91511e-09	5.81857e-08
NM_133234	Bbc3	8.98612	4.07882	1.14042	3.57661	0.000348083	0.00138831
NM_133237	Apcdd1	24.7637	2.4307	0.68546	3.54609	0.000390987	0.00154202
NM_133241	Mlc1	13.9553	3.1309	0.943677	3.31777	0.000907398	0.00324501
NM_133346	Asb6	61.7591	3.18659	0.535889	5.94638	2.74145e-09	2.86758e-08
NM_133350	Mapre3	455.622	1.84622	0.276233	6.68356	2.33205e-11	3.30712e-10
NM_133360	Acaca	200.531	1.92891	0.313796	6.14703	7.89491e-10	9.00209e-09
NM_133485	Ppp1r14c	275.746	3.2412	0.468509	6.9181	4.57729e-12	7.22659e-11
NM_133655	Cd81	257.544	2.94629	0.455574	6.46722	9.98254e-11	1.28705e-09
NM_133662	Ier3	38.3116	5.00911	0.98062	5.1081	3.25412e-07	2.37385e-06
NM_133664	Lad1	36.986	2.22212	0.696504	3.19039	0.00142079	0.00483075
NM_133667	Pdk2	245.393	2.72409	0.41059	6.63458	3.25419e-11	4.52193e-10
NM_133668	Slc25a3	989.461	1.55801	0.237439	6.56175	5.31804e-11	7.16685e-10
NM_133669	Rp2h	46.4174	3.58293	0.599081	5.98072	2.22157e-09	2.36892e-08
NM_133673	Tor1b	65.4573	1.50988	0.462913	3.2617	0.00110746	0.00386669
NM_133674	Arhgef5	324.631	3.11786	0.301592	10.338	4.74307e-25	3.77161e-23
NM_133676	Osgep	23.9707	3.06018	0.702022	4.35909	1.30605e-05	7.0592e-05
NM_133678	Sac3d1	49.3074	3.1139	0.599863	5.19101	2.09153e-07	1.58435e-06
NM_133687	Cxxc5	268.941	2.78014	0.363527	7.64767	2.04655e-14	4.44679e-13
NM_133694	Fbxl15	28.0439	3.98447	0.954562	4.17413	2.99126e-05	0.000150385
NM_133739	Tmem123	2210.06	1.10241	0.330508	3.3355	0.000851462	0.00306955
NM_133740	Prmt3	612.699	1.81359	0.293586	6.17737	6.51767e-10	7.5327e-09
NM_133747	Fam98a	5639.79	1.79419	0.370425	4.8436	1.27505e-06	8.33643e-06
NM_133765	Fbxo31	180.265	1.31646	0.430597	3.05729	0.00223346	0.00719598
NM_133767	Mtif2	483.134	1.19379	0.279531	4.2707	1.94858e-05	0.000101911
NM_133768	Asl	20.0759	2.572	0.689842	3.72839	0.000192707	0.000812333
NM_133781	Cab39	1670.04	0.985228	0.301636	3.26628	0.0010897	0.00381522
NM_133784	Wwtr1	22.3513	3.71307	0.783346	4.74002	2.13699e-06	1.3473e-05
NM_133797	4833439L19Rik	39.446	1.63275	0.51273	3.18444	0.00145037	0.004917
NM_133798	Exd2	711.072	1.09112	0.276475	3.94653	7.92922e-05	0.000362629
NM_133803	Dpp3	179.388	2.25494	0.370501	6.08619	1.15628e-09	1.2913e-08
NM_133808	Hdlbp	19530.1	0.658882	0.21272	3.09741	0.00195222	0.00638466
NM_133810	Stk17b	150.354	5.31735	0.472916	11.2437	2.48608e-29	3.06981e-27
NM_133821	Phlpp1	668.251	2.89315	0.27674	10.4544	1.39844e-25	1.20679e-23
NM_133831	Gltscr2	466.464	3.05481	0.367927	8.30277	1.01713e-16	2.93692e-15
NM_133840	Clp1	262.164	3.73273	0.346882	10.7608	5.27049e-27	5.19793e-25
NM_133854	Snapin	1150.11	1.01243	0.306752	3.30047	0.000965225	0.00343644
NM_133879	Zbtb48	188.269	1.66375	0.35426	4.6964	2.64791e-06	1.64149e-05
NM_133883	Adprhl2	24.4476	2.91875	0.814929	3.5816	0.000341491	0.00136524
NM_133900	Psph	155.724	3.82882	0.566829	6.7548	1.43031e-11	2.09686e-10
NM_133928	Chchd4	199.752	4.83413	0.547149	8.83511	9.99987e-19	3.66855e-17
NM_133930	Creld1	29.2659	3.03196	0.675382	4.48925	7.1473e-06	4.05958e-05
NM_133945	Vrk3	128.645	3.1356	0.404541	7.75101	9.11654e-15	2.08842e-13
NM_133952	Unc45a	68.3089	4.59639	0.626304	7.33891	2.15348e-13	4.12447e-12
NM_133954	Usb1	65.5049	2.28696	0.426324	5.36436	8.12351e-08	6.61554e-07
NM_133968	Snapc2	368.576	3.50863	0.51593	6.80059	1.04193e-11	1.56064e-10
NM_133971	Ankrd10	102.752	1.7337	0.458415	3.78196	0.000155601	0.000667966
NM_133972	Armc6	24.3196	3.54337	0.760147	4.66143	3.14025e-06	1.91851e-05
NM_133982	Rpp25	18.4214	2.92561	0.737021	3.96951	7.20201e-05	0.000332172
NM_133984	Hemk1	23.8875	3.12988	0.856533	3.65412	0.000258065	0.00106191
NM_133985	Oxsr1	324.585	2.19884	0.343338	6.4043	1.51059e-10	1.90714e-09
NM_133990	Il13ra1	75.9998	6.51284	0.746516	8.72431	2.67811e-18	9.26539e-17
NM_133993	Pwp1	373.256	3.66625	0.399566	9.17558	4.49152e-20	1.95465e-18
NM_133994	Gstt3	119.602	4.20544	0.5818	7.22833	4.88967e-13	8.841e-12
NM_133998	Fam207a	201.255	2.22145	0.347121	6.39964	1.55742e-10	1.96299e-09
NM_133999	Fig4	229.093	2.21295	0.373907	5.91845	3.24995e-09	3.3716e-08
NM_134003	Zc3h10	192.148	1.96886	0.503347	3.91154	9.17087e-05	0.000413929
NM_134020	Tmed4	228.639	4.36286	0.473003	9.22375	2.86878e-20	1.29291e-18
NM_134040	Ddx1	934.859	0.931387	0.235752	3.9507	7.79222e-05	0.000356578
NM_134052	Adi1	153.946	3.16699	0.475909	6.65461	2.84053e-11	3.9689e-10
NM_134058	Pelo	203.737	1.73656	0.424299	4.09277	4.26257e-05	0.000207966
NM_134068	Dusp22	87.8796	2.48414	0.508915	4.88126	1.05411e-06	6.99423e-06
NM_134084	Ppif	955.024	3.03513	0.362529	8.37211	5.65948e-17	1.68212e-15
NM_134089	Scrib	168.723	3.56096	0.438461	8.12151	4.60423e-16	1.21405e-14
NM_134093	Letmd1	246.543	2.32414	0.30111	7.71857	1.1764e-14	2.65091e-13
NM_134099	Fbxo4	6.83755	4.36915	1.22298	3.57256	0.000353515	0.00140739
NM_134100	Mfsd5	198.329	1.87857	0.443699	4.23389	2.29682e-05	0.000118573
NM_134102	Pla1a	531.722	2.45269	0.250926	9.77458	1.44761e-22	9.04784e-21
NM_134110	Kcne2	45.0765	3.31513	0.581081	5.70511	1.16268e-08	1.09055e-07
NM_134117	Pkdcc	14.1676	4.12455	1.01069	4.08092	4.48576e-05	0.000217806
NM_134138	Psmg2	47.7318	3.46993	0.738456	4.6989	2.61566e-06	1.62349e-05
NM_134139	Wdr74	282.979	2.17001	0.408209	5.31593	1.06117e-07	8.46036e-07
NM_134147	Macrod1	26.3876	1.99666	0.678309	2.94358	0.00324441	0.00998947
NM_134148	Carns1	10.6846	5.05939	1.16955	4.32592	1.51896e-05	8.10612e-05
NM_134151	Yars	120.654	5.24077	0.538111	9.73921	2.05142e-22	1.24157e-20
NM_134154	Slc25a45	20.1013	4.17834	0.929832	4.49365	7.00116e-06	3.97806e-05
NM_134188	Acot2	718.052	4.4826	0.466237	9.61442	6.94976e-22	3.79687e-20
NM_134189	Galnt10	12.5722	3.71026	1.08538	3.41841	0.000629888	0.00235207
NM_134448	Dst	2885.23	0.795514	0.241997	3.28729	0.00101157	0.0035788
NM_138310	Apobr	8.22856	4.74755	1.1888	3.99356	6.5088e-05	0.000303517
NM_138313	Bmf	47.5939	6.08587	0.896231	6.79051	1.11735e-11	1.66375e-10
NM_138584	Spg21	356.839	1.62146	0.310734	5.21818	1.80687e-07	1.3832e-06
NM_138599	Tomm70a	324.768	1.99994	0.30346	6.59044	4.3852e-11	5.98942e-10
NM_138602	Praf2	97.171	2.35119	0.477248	4.92655	8.36961e-07	5.65722e-06
NM_138646	Hps4	417.378	1.53123	0.297748	5.14269	2.70827e-07	2.00454e-06
NM_138648	Olr1	6.45918	3.98917	1.25834	3.1702	0.00152337	0.00512899
NM_138649	Syt17	9.3152	4.48928	1.22936	3.65172	0.000260485	0.00107115
NM_138655	Tmc2	67.0081	1.60851	0.45981	3.49821	0.000468386	0.00181014
NM_138660	Casc3	1142.37	2.50576	0.283116	8.85067	8.69961e-19	3.23055e-17
NM_138683	Rspo1	33.6973	6.70323	1.05494	6.35416	2.09575e-10	2.59416e-09
NM_138746	Fam50b	5.22366	3.82477	1.26492	3.02372	0.00249685	0.00792852
NM_138747	Nop2	373.632	3.59634	0.43106	8.34302	7.24145e-17	2.11914e-15
NM_138753	Hexim1	70.473	4.53224	0.672552	6.73886	1.59634e-11	2.32011e-10
NM_138950	Wdr81	694.118	4.35535	0.431197	10.1006	5.49009e-24	3.86035e-22
NM_138953	Ell2	3046.31	2.3977	0.345351	6.94279	3.84436e-12	6.13966e-11
NM_138955	Abcg4	20.9726	6.07575	1.09199	5.56395	2.63734e-08	2.34382e-07
NM_139061	Vps54	2676.99	1.40718	0.28975	4.85654	1.19455e-06	7.84524e-06
NM_139064	Tnip2	38.3159	3.77489	0.769396	4.9063	9.28102e-07	6.22341e-06
NM_139147	Rab40b	8.27378	3.29511	1.0611	3.10536	0.00190046	0.00624629
NM_139153	Agap3	427.651	1.13782	0.328082	3.46809	0.00052418	0.00200434
NM_139154	Rab40c	238.804	3.29341	0.460484	7.15206	8.54852e-13	1.49752e-11
[truncated: 657 more rows]

## Sheet: S2 Table Down_In_Ythdc1 cKO
NCBI Accession	Gene	baseMean log2FoldChange lfcSE stat pvalue padj
NM_001001130	Zfp85	73.2788	-1.60955	0.506092	-3.18035	0.00147096	0.00497459
NM_001001178	Ccdc148	28.1625	-1.77155	0.571789	-3.09826	0.00194664	0.00637051
NM_001001181	BC031181	806.749	-1.03188	0.289431	-3.56521	0.000363567	0.00144276
NM_001001187	Zfp738	193.852	-2.74779	0.442368	-6.21156	5.24606e-10	6.15014e-09
NM_001001309	Itga8	366.155	-1.48671	0.394255	-3.77094	0.000162633	0.000696578
NM_001001495	Tnip3	202.47	-5.77138	0.478805	-12.0537	1.8539e-33	3.35202e-31
NM_001001883	Hecw2	280.702	-2.70596	0.299688	-9.02926	1.72836e-19	6.98148e-18
NM_001002267	Tmem158	21.6497	-2.32437	0.65816	-3.53161	0.000413039	0.00162267
NM_001002898	Sirpb1a	11.2823	-5.33034	1.15233	-4.62571	3.73315e-06	2.24019e-05
NM_001002929	Nup85	806.909	-0.99368	0.259669	-3.82671	0.000129867	0.000569077
NM_001003910	Ttc41	489.274	-2.57913	0.303778	-8.4902	2.06274e-17	6.44626e-16
NM_001003919	Ddx11	1191.11	-3.84279	0.499418	-7.69454	1.42008e-14	3.15324e-13
NM_001003948	Pid1	303.191	-2.77585	0.338203	-8.20762	2.25617e-16	6.17419e-15
NM_001004140	Ckap2	3226.69	-0.871899	0.259653	-3.35794	0.00078526	0.00285871
NM_001004148	Slc13a5	7.14608	-4.61249	1.20704	-3.82132	0.000132738	0.000580487
NM_001004153	AU018091	401.188	-3.95881	0.434756	-9.10582	8.56195e-20	3.59224e-18
NM_001004178	AA415398	101.629	-1.90937	0.389742	-4.89907	9.6292e-07	6.43698e-06
NM_001004194	Nlrp4e	2043.85	-3.06509	0.315097	-9.72744	2.30311e-22	1.37175e-20
NM_001004436	Wapal	14365.8	-1.56408	0.258813	-6.04327	1.51018e-09	1.65967e-08
NM_001004468	Tacc2	4926.99	-1.18407	0.200113	-5.91698	3.27904e-09	3.39714e-08
NM_001004761	Gpr158	571.926	-2.13979	0.352657	-6.06763	1.29808e-09	1.44117e-08
NM_001005358	Zfp960	108.247	-2.04931	0.518711	-3.95076	7.79025e-05	0.000356578
NM_001005371	Gm13084	16966.8	-1.50804	0.324226	-4.6512	3.30008e-06	2.00246e-05
NM_001005385	Gprasp1	18.2741	-2.07335	0.688365	-3.012	0.00259536	0.00820362
NM_001005767	Parl	3526.98	-1.31349	0.275628	-4.76545	1.88428e-06	1.19592e-05
NM_001005784	Inadl	73.7484	-1.59137	0.537429	-2.96108	0.00306563	0.00950607
NM_001005787	Inadl	103.534	-3.79509	0.468422	-8.10187	5.4121e-16	1.41235e-14
NM_001005788	Zfp69	574.741	-2.1712	0.289456	-7.50094	6.3362e-14	1.28884e-12
NM_001005863	Mtus1	63724.8	-0.696606	0.226588	-3.07432	0.0021098	0.00684258
NM_001007077	Gm13023	14985.7	-3.41164	0.327406	-10.4202	2.00499e-25	1.70122e-23
NM_001007462	Pabpn1l	354.091	-2.84454	0.502176	-5.66443	1.47513e-08	1.35619e-07
NM_001007567	Slc7a6os	2137.81	-0.957665	0.222386	-4.30632	1.65996e-05	8.8029e-05
NM_001007575	Zfp58	1623.98	-1.52087	0.270571	-5.62098	1.89877e-08	1.71454e-07
NM_001007589	Akirin2	9137.51	-0.763271	0.193156	-3.95157	7.76402e-05	0.000355502
NM_001008233	Plekhn1	13.0386	-2.40564	0.796578	-3.01997	0.00252798	0.00801564
NM_001008425	Thoc6	125.191	-1.21997	0.403121	-3.02631	0.00247558	0.00787885
NM_001008428	Fbxw20	1521.34	-1.47997	0.233541	-6.33708	2.34155e-10	2.8773e-09
NM_001008501	Zfp760	221.21	-2.45671	0.379514	-6.4733	9.58855e-11	1.24153e-09
NM_001008785	Kbtbd8	588.528	-1.84853	0.403032	-4.58656	4.50608e-06	2.6609e-05
NM_001009575	Armcx5	804.738	-1.95452	0.237658	-8.22409	1.96679e-16	5.471e-15
NM_001009951	Cep44	159.492	-1.63995	0.345584	-4.74546	2.08028e-06	1.31319e-05
NM_001011733	Olfr288	511.996	-5.45283	0.324858	-16.7853	3.12869e-63	5.27984e-60
NM_001011840	Olfr1463	29.0158	-3.88842	0.754673	-5.15246	2.57091e-07	1.90939e-06
NM_001012325	Zfp708	11.7838	-3.09808	0.877726	-3.52967	0.000416082	0.00163336
NM_001013371	Dtx3l	238.407	-3.25457	0.355124	-9.16459	4.97351e-20	2.15822e-18
NM_001013374	Lman2l	156.964	-1.23077	0.349085	-3.52569	0.000422375	0.00165421
NM_001013376	Rpp38	613.302	-1.15556	0.322163	-3.58687	0.000334669	0.00134044
NM_001013377	Arhgef39	883.847	-2.27109	0.263689	-8.61275	7.13293e-18	2.37577e-16
NM_001013385	Grm4	62.3225	-1.96933	0.45122	-4.36447	1.27431e-05	6.89989e-05
NM_001013616	Trim6	39.3563	-3.00728	0.653911	-4.59891	4.2471e-06	2.51776e-05
NM_001013745	Zfp57	531.007	-1.70626	0.273894	-6.22966	4.67456e-10	5.52078e-09
NM_001013776	Fbxw24	17171.3	-0.805474	0.23569	-3.41752	0.00063194	0.00235821
NM_001013777	Zfp488	6.25148	-4.20179	1.24534	-3.37402	0.000740789	0.002717
NM_001014398	Trcg1	7.75258	-3.87566	1.12933	-3.43182	0.000599544	0.00225114
NM_001014974	Ttll4	1452.01	-0.62306	0.209675	-2.97154	0.00296308	0.00922954
NM_001017426	Kdm6b	6175.14	-1.49945	0.24514	-6.11672	9.55196e-10	1.07782e-08
NM_001017429	Cox17	362.246	-2.42834	0.357388	-6.79469	1.08542e-11	1.62258e-10
NM_001024134	Trim15	25.6806	-3.00759	0.97687	-3.0788	0.00207835	0.00675977
NM_001024135	Kbtbd7	13099.7	-2.25866	0.3102	-7.28133	3.30546e-13	6.15237e-12
NM_001024137	Pla2g4d	36.8935	-3.34703	0.586246	-5.70927	1.13463e-08	1.06507e-07
NM_001024147	Gm5868	119.82	-1.26941	0.409071	-3.10315	0.00191471	0.00628361
NM_001024205	Nufip2	5434.36	-1.80746	0.34994	-5.16506	2.40367e-07	1.79572e-06
NM_001024604	Ankrd28	1929.44	-2.16293	0.320232	-6.75427	1.43552e-11	2.10248e-10
NM_001024626	Zfp873	627.494	-2.68726	0.334425	-8.03545	9.32367e-16	2.36407e-14
NM_001024703	Mctp2	5015.75	-2.41188	0.203097	-11.8755	1.58689e-32	2.59158e-30
NM_001024806	Cebpz	1522.36	-2.54497	0.223895	-11.3668	6.11904e-30	8.15228e-28
NM_001024919	Bod1	4131.36	-1.47209	0.283552	-5.19161	2.0848e-07	1.58082e-06
NM_001024928	Zfp667	112.473	-1.88186	0.35184	-5.34862	8.86293e-08	7.15251e-07
NM_001024950	Zfp563	233.189	-2.14925	0.421749	-5.09604	3.46827e-07	2.51677e-06
NM_001025373	Zfp943	136.776	-1.42492	0.433886	-3.28409	0.00102313	0.00361491
NM_001025605	Gm527	403.022	-2.24721	0.372673	-6.02998	1.6398e-09	1.78917e-08
NM_001025612	Snx22	210.529	-1.36369	0.358964	-3.79897	0.000145301	0.00062855
NM_001029889	Gm608	2173.78	-1.27197	0.342154	-3.71753	0.000201183	0.000844546
NM_001029937	Sec14l3	142.993	-2.90105	0.528234	-5.49197	3.97477e-08	3.40682e-07
NM_001030307	Dkc1	3021.22	-2.29246	0.273555	-8.38022	5.28277e-17	1.57942e-15
NM_001031772	Lin28b	1088.17	-2.72192	0.352882	-7.71341	1.225e-14	2.7488e-13
NM_001031814	Smg1	5280.69	-0.832136	0.241136	-3.45089	0.000558734	0.00211569
NM_001033043	Rnf17	2699.02	-0.953957	0.283923	-3.35991	0.000779673	0.00284177
NM_001033122	Cd69	63.6688	-2.40062	0.539346	-4.45098	8.54781e-06	4.78702e-05
NM_001033145	1190002N15Rik	6037.21	-1.27766	0.272089	-4.69575	2.65624e-06	1.64598e-05
NM_001033167	Slc22a23	2034.88	-1.28834	0.21609	-5.96208	2.49054e-09	2.62698e-08
NM_001033173	Usp31	3526.18	-1.29818	0.252046	-5.15057	2.59697e-07	1.92686e-06
NM_001033176	1700039E15Rik	17.9614	-2.74557	0.889326	-3.08725	0.0020202	0.00658993
NM_001033177	Krt76	53.7775	-4.13764	0.598042	-6.91863	4.56028e-12	7.20723e-11
NM_001033191	Naa11	1520.25	-1.10648	0.348721	-3.17297	0.00150888	0.00509039
NM_001033214	E330034G19Rik	8868.85	-1.16753	0.265515	-4.39723	1.09641e-05	6.01601e-05
NM_001033215	Zfp957	3806.34	-2.29743	0.237434	-9.67606	3.81111e-22	2.15179e-20
NM_001033217	Prickle1	5710.76	-1.09397	0.194015	-5.63859	1.71444e-08	1.56015e-07
NM_001033222	Pdzd8	1526.81	-0.820155	0.262191	-3.12808	0.00175953	0.00583106
NM_001033226	Calr4	1776.46	-1.38808	0.246299	-5.63577	1.7428e-08	1.58311e-07
NM_001033246	Ccdc110	90.8207	-3.54313	0.643771	-5.50372	3.71869e-08	3.19816e-07
NM_001033249	Zfp583	207.413	-1.65953	0.42135	-3.9386	8.19583e-05	0.000374258
NM_001033250	Lemd1	14.7115	-3.27596	0.819905	-3.99554	6.45481e-05	0.000301192
NM_001033259	Mcu	1807.56	-1.69511	0.261653	-6.47848	9.26509e-11	1.20169e-09
NM_001033261	Zfc3h1	2138.19	-1.09489	0.252836	-4.33045	1.48805e-05	7.96355e-05
NM_001033269	Eif4e1b	8094.19	-1.32686	0.276256	-4.80299	1.56311e-06	1.00468e-05
NM_001033270	Slc4a7	1757.65	-1.14948	0.371099	-3.09751	0.00195151	0.0063837
NM_001033274	Brd1	5483.41	-0.650066	0.214034	-3.03722	0.00238774	0.00762832
NM_001033275	Gxylt1	8486.61	-1.82226	0.239123	-7.62061	2.52477e-14	5.44689e-13
NM_001033276	Kmt2d	14332.9	-1.24681	0.221357	-5.63256	1.77553e-08	1.61092e-07
NM_001033283	Oosp3	4511.8	-2.66332	0.381026	-6.98985	2.75184e-12	4.50376e-11
NM_001033285	Cdc42bpa	5959.92	-1.23003	0.241761	-5.08778	3.62274e-07	2.6201e-06
NM_001033317	Cnga4	81.1042	-2.31871	0.418838	-5.53605	3.09367e-08	2.70349e-07
NM_001033321	Tmem231	1117.25	-0.772614	0.228608	-3.37964	0.000725806	0.0026672
NM_001033325	A630095E13Rik	119.372	-5.45021	0.498255	-10.9386	7.53445e-28	8.23261e-26
NM_001033346	Lrrc55	51.9079	-4.52178	0.684792	-6.60314	4.02531e-11	5.53771e-10
NM_001033367	Nlrc4	305.394	-2.79855	0.40573	-6.89756	5.29031e-12	8.2749e-11
NM_001033385	Tbc1d32	459.51	-0.895099	0.243426	-3.67709	0.000235914	0.000978178
NM_001033404	Gm813	3644.24	-3.49945	0.23971	-14.5987	2.86248e-48	1.81147e-45
NM_001033409	Lgr6	456.061	-2.68784	0.262072	-10.2561	1.11062e-24	8.47643e-23
NM_001033425	Zscan10	59.8693	-2.47646	0.461412	-5.36712	8.00026e-08	6.52566e-07
NM_001033429	Trim75	12903.6	-1.9223	0.25967	-7.40289	1.33255e-13	2.61484e-12
NM_001033441	Alg10b	7544.31	-2.54074	0.307065	-8.27428	1.29232e-16	3.65509e-15
NM_001033445	Garem	676.28	-1.87991	0.31093	-6.04609	1.48402e-09	1.63329e-08
NM_001033452	Accsl	10196.6	-1.89655	0.283116	-6.69885	2.10072e-11	2.99023e-10
NM_001033489	Rnf207	85.2288	-3.80375	0.650061	-5.85137	4.8754e-09	4.87476e-08
NM_001033491		29369.6	-2.23335	0.357863	-6.24081	4.35297e-10	5.15299e-09
NM_001033530	AW146154	388.415	-2.55667	0.368152	-6.9446	3.7954e-12	6.06785e-11
NM_001033532	AW554918	3556.26	-1.41278	0.314301	-4.49499	6.9574e-06	3.95912e-05
NM_001033542	Slc47a2	7.67992	-3.95675	1.10654	-3.57579	0.000349177	0.00139194
NM_001033550	Lrrc8b	4553.22	-1.2204	0.291957	-4.18008	2.91405e-05	0.000146795
NM_001033633	Slc2a13	172.676	-2.04034	0.454699	-4.48722	7.21592e-06	4.09396e-05
NM_001033669	Fbxw10	57.861	-2.68342	0.556439	-4.82249	1.41777e-06	9.21003e-06
NM_001033768	Pin1rt1	469.839	-0.979952	0.317327	-3.08814	0.0020141	0.00657429
NM_001033773	Ube2u	104.989	-2.99176	0.435086	-6.87625	6.1447e-12	9.48432e-11
NM_001033780	I830077J02Rik	98.3454	-2.73726	0.592197	-4.62221	3.79669e-06	2.27472e-05
NM_001033789	Gm5820	195.38	-3.14817	0.386635	-8.14248	3.87265e-16	1.03552e-14
NM_001033794	Fbxw18	4092.7	-0.835638	0.223562	-3.73783	0.000185615	0.000785929
NM_001033819	9130409I23Rik	844.162	-3.33618	0.475466	-7.01665	2.27256e-12	3.75987e-11
NM_001033879	Tubal3	750.448	-4.11033	0.464148	-8.85565	8.31945e-19	3.1199e-17
NM_001033983	7420426K07Rik	1302.85	-0.824275	0.272538	-3.02444	0.00249094	0.00791411
NM_001034858	Armc2	78.3232	-2.36679	0.546469	-4.33106	1.48396e-05	7.94445e-05
NM_001034869	Gm4981	55.0342	-2.98154	0.548915	-5.4317	5.58184e-08	4.65551e-07
NM_001034882	Kbtbd6	1554.93	-1.7325	0.263719	-6.5695	5.04834e-11	6.8337e-10
NM_001034900	Zfp345	818.383	-2.74454	0.460914	-5.95456	2.6078e-09	2.73909e-08
NM_001034903	Mansc4	19.9801	-2.52367	0.790805	-3.19127	0.0014165	0.00481833
NM_001035123	Setd6	346.945	-2.01812	0.452026	-4.46461	8.02158e-06	4.51228e-05
NM_001035533	Akap2	17.7328	-2.96126	0.84014	-3.52473	0.00042392	0.00165898
NM_001037321	Fbxo40	426.775	-2.06645	0.330403	-6.25432	3.9924e-10	4.75208e-09
NM_001037634	Oosp2	2818.01	-2.59047	0.28773	-9.00313	2.19369e-19	8.79097e-18
NM_001037711	Cgn	1231.4	-0.924175	0.308168	-2.99893	0.00270925	0.00851223
NM_001037725	Fam117b	7471.32	-1.4485	0.277359	-5.22248	1.7654e-07	1.3535e-06
NM_001037743	4921506M07Rik	81.8836	-4.48613	0.500698	-8.95976	3.25373e-19	1.27365e-17
NM_001037746	Prps1l3	709.23	-1.00513	0.241326	-4.16502	3.11325e-05	0.000156002
NM_001037878	Tcf25	68.3985	-1.68867	0.421601	-4.00537	6.19214e-05	0.000290715
NM_001037917	Gm6377	22.9227	-2.88151	0.855043	-3.37002	0.000751635	0.0027508
NM_001037918	Lipt1	562.279	-1.99776	0.260534	-7.66795	1.74764e-14	3.82467e-13
NM_001037940	Dnajb6	429.989	-1.14184	0.292029	-3.91003	9.22849e-05	0.000416282
NM_001038621	Rabgap1l	811.156	-2.10151	0.356347	-5.89737	3.69337e-09	3.77743e-08
NM_001038641	Slx4ip	52.8995	-2.81272	0.615062	-4.57307	4.8063e-06	2.81955e-05
NM_001038676	Obox7	1896.28	-2.13973	0.41557	-5.1489	2.62014e-07	1.9431e-06
NM_001039061	Klhl15	279.601	-2.83689	0.401578	-7.06437	1.61351e-12	2.74731e-11
NM_001039103	Rasa4	50.6425	-2.81944	0.522727	-5.39372	6.90153e-08	5.68441e-07
NM_001039179	Bicd2	93.4946	-1.65812	0.488217	-3.39628	0.000683074	0.00252176
NM_001039209	Gm13152	72.4048	-3.08872	0.506938	-6.09289	1.1089e-09	1.24203e-08
NM_001039219	Gm6086	235.99	-3.81487	0.352169	-10.8325	2.41475e-27	2.512e-25
NM_001039223	Gm14137	239.725	-1.23637	0.381122	-3.24403	0.0011785	0.00408188
NM_001039231	Zfp951	498.458	-2.92273	0.301357	-9.69857	3.05753e-22	1.78607e-20
NM_001039493	Plekhm3	946.356	-1.62334	0.24444	-6.64106	3.11436e-11	4.33556e-10
NM_001039556	Rad54b	473.208	-1.27393	0.244248	-5.21574	1.83082e-07	1.40013e-06
NM_001039692	Arhgap12	118.103	-2.20619	0.355478	-6.20627	5.42554e-10	6.34358e-09
NM_001040086		118.984	-3.64616	0.489472	-7.44917	9.39313e-14	1.87962e-12
NM_001040435	Tacc3	13947.9	-1.11931	0.220031	-5.08705	3.63676e-07	2.62899e-06
NM_001040459	Shroom4	1500.16	-1.56487	0.222833	-7.02263	2.17728e-12	3.62593e-11
NM_001042501	Fam133b	856.531	-1.79665	0.271314	-6.62202	3.54317e-11	4.90106e-10
NM_001042612	Nlrp9c	4726.11	-2.88281	0.305581	-9.43384	3.95329e-21	1.96861e-19
NM_001042634	Clk1	2659.74	-1.12675	0.287981	-3.91258	9.13135e-05	0.000412513
NM_001042670	Mterf1b	31.1099	-2.03699	0.58218	-3.4989	0.000467181	0.0018064
NM_001042672	Gpcpd1	60.0122	-1.56728	0.455256	-3.44263	0.000576087	0.00217274
NM_001045483	Mapk1ip1	524.187	-1.8738	0.267511	-7.00459	2.47716e-12	4.08503e-11
NM_001045513	Raph1	1040.95	-1.27482	0.249586	-5.10774	3.26038e-07	2.37727e-06
NM_001045527	Hsf5	525.444	-2.12918	0.289357	-7.35829	1.86284e-13	3.61338e-12
NM_001045533	March4	77.8341	-1.7184	0.453379	-3.7902	0.000150526	0.000649299
NM_001045559	Zfp952	937.407	-1.59971	0.298501	-5.35916	8.36099e-08	6.79436e-07
NM_001048219	Nlrp9a	504.978	-1.10415	0.263304	-4.19345	2.74739e-05	0.000139463
NM_001077354	C77370	984.92	-1.56549	0.429146	-3.64792	0.000264377	0.00108611
NM_001077495	Pik3r1	2540.13	-1.24724	0.321332	-3.88147	0.000103828	0.000463536
NM_001077684	Ccdc173	107.044	-2.51926	0.522474	-4.82178	1.42283e-06	9.23633e-06
NM_001077707	Shprh	505.177	-1.51217	0.443121	-3.41254	0.000643603	0.00239191
NM_001079873	Brdt	421.701	-3.37358	0.476991	-7.07262	1.52037e-12	2.60331e-11
NM_001080811	Bpifa6	12.6332	-2.96196	0.984825	-3.0076	0.00263319	0.00830071
NM_001080814	Fat3	989.23	-5.48453	0.52455	-10.4557	1.37996e-25	1.19765e-23
NM_001080925	Rapgefl1	876.738	-1.46698	0.368235	-3.98383	6.78141e-05	0.000314877
NM_001080930	Atxn1l	4465.26	-2.33796	0.256959	-9.0986	9.15078e-20	3.82871e-18
NM_001080932	Foxk2	3056.47	-1.34601	0.235184	-5.72322	1.04526e-08	9.88509e-08
NM_001081012	Ccdc171	2300.41	-0.941804	0.220888	-4.26372	2.01047e-05	0.00010504
NM_001081034	Fbxo11	6129.64	-0.938935	0.281273	-3.33817	0.000843326	0.00304455
NM_001081035	Nav3	2456.35	-1.61787	0.239254	-6.76214	1.35971e-11	2.00303e-10
NM_001081045	Kansl1	4458.29	-0.814657	0.201913	-4.03468	5.46764e-05	0.000260403
NM_001081046	Efcab3	220.039	-2.68731	0.360137	-7.46192	8.52717e-14	1.70858e-12
NM_001081052	Nhs	280.459	-2.08629	0.521929	-3.99728	6.40754e-05	0.000299255
NM_001081053		192.563	-1.85691	0.424417	-4.37521	1.21316e-05	6.59936e-05
NM_001081059	Mcur1	1060.3	-1.87581	0.376495	-4.98231	6.283e-07	4.35935e-06
NM_001081064	Pdzd2	4528.65	-1.6012	0.194347	-8.23887	1.73849e-16	4.86683e-15
NM_001081067	A1bg	197.792	-2.59191	0.452109	-5.73293	9.8712e-09	9.38197e-08
NM_001081078	Lct	36.1979	-2.34373	0.581171	-4.03277	5.51237e-05	0.000262369
NM_001081080	Phf3	25599.8	-0.838247	0.237718	-3.52623	0.000421523	0.0016513
NM_001081084	Cubn	81.6962	-1.67405	0.554872	-3.017	0.00255289	0.00808113
NM_001081086	Ppig	11301.6	-1.02428	0.216376	-4.73378	2.20374e-06	1.38412e-05
NM_001081088	Lrp2	212.285	-2.88216	0.292822	-9.84271	7.36996e-23	4.743e-21
NM_001081092	Taf4a	3221.69	-0.994686	0.282241	-3.52424	0.000424702	0.00166161
NM_001081093	Arfip1	8798.84	-1.59687	0.281488	-5.67294	1.40367e-08	1.29678e-07
NM_001081101	Uvssa	996.431	-2.55851	0.331121	-7.72682	1.10271e-14	2.50529e-13
NM_001081105	Rhoh	410.442	-2.50978	0.35824	-7.00586	2.45476e-12	4.05249e-11
NM_001081112	Ankrd26	2844.3	-2.0618	0.205012	-10.057	8.55747e-24	5.93474e-22
NM_001081113	Ipo8	7797.71	-1.04075	0.286865	-3.628	0.000285626	0.00116678
NM_001081117	Mki67	18739.2	-1.54159	0.264589	-5.82636	5.66498e-09	5.57975e-08
NM_001081129	Cntnap3	74.1107	-4.23604	0.528609	-8.01356	1.11432e-15	2.81134e-14
NM_001081148	Cyp2b23	119.898	-2.34136	0.393201	-5.95462	2.60673e-09	2.73909e-08
NM_001081150	Lonrf1	2234.96	-0.935721	0.300756	-3.11123	0.00186312	0.0061422
NM_001081163	Chsy1	8549.39	-0.952942	0.232986	-4.09012	4.31147e-05	0.000210015
NM_001081187	Htra4	625.226	-1.68117	0.25079	-6.7035	2.03489e-11	2.90748e-10
NM_001081190	Gabrr3	202.781	-1.395	0.343016	-4.06686	4.76516e-05	0.000230048
NM_001081196	Hnrnpul2	11012.9	-1.52571	0.234937	-6.49413	8.35141e-11	1.09252e-09
NM_001081198	Tmem182	92.7026	-2.1496	0.520446	-4.1303	3.62286e-05	0.000179289
NM_001081213	Ermp1	28964.2	-1.28271	0.266873	-4.80644	1.53642e-06	9.90455e-06
NM_001081215		145.139	-4.32278	0.568228	-7.60748	2.79486e-14	5.96184e-13
NM_001081216	Phip	4585.01	-1.19007	0.232014	-5.12931	2.90814e-07	2.141e-06
NM_001081222	Esco1	4809.8	-1.35744	0.401446	-3.38139	0.000721209	0.00265159
NM_001081230	Map9	1078.91	-2.35833	0.269558	-8.74888	2.15472e-18	7.48878e-17
NM_001081238	Palb2	891.872	-1.55405	0.234086	-6.63878	3.16289e-11	4.39908e-10
NM_001081247	Polr3a	3998.44	-1.13805	0.212661	-5.35146	8.72459e-08	7.05586e-07
NM_001081253	Fbxo43	3322.79	-1.74468	0.260276	-6.70319	2.03913e-11	2.91074e-10
NM_001081258		11049.6	-1.47623	0.23636	-6.24571	4.21889e-10	5.00207e-09
NM_001081277	Ak5	91.0271	-4.36228	0.51488	-8.47243	2.40329e-17	7.44921e-16
NM_001081282	Ibtk	7199.24	-1.19948	0.21728	-5.52047	3.38103e-08	2.93602e-07
NM_001081299	Cdh18	37.6525	-4.00322	0.729848	-5.48501	4.13446e-08	3.52777e-07
NM_001081300	Tshz1	2380.53	-2.01159	0.215283	-9.34395	9.28022e-21	4.40463e-19
NM_001081319	Ric1	3392.7	-2.67208	0.252529	-10.5813	3.63954e-26	3.27085e-24
NM_001081323	Mphosph9	580.938	-1.08781	0.29754	-3.65599	0.00025619	0.00105476
NM_001081330	Dnah2	140.23	-1.64211	0.380586	-4.31468	1.59832e-05	8.49679e-05
NM_001081352	Ttc37	2272.08	-1.36348	0.248943	-5.47707	4.32421e-08	3.67484e-07
NM_001081360	Camsap2	9017.53	-1.04373	0.224223	-4.6549	3.24138e-06	1.97157e-05
NM_001081363	Cenpf	33894.6	-0.909774	0.218321	-4.16714	3.08441e-05	0.00015471
NM_001081373	Cep164	1837.26	-1.7738	0.292069	-6.0732	1.25386e-09	1.39412e-08
NM_001081376	Chd5	6.28541	-3.88006	1.14515	-3.38825	0.000703402	0.00259051
NM_001081383	Kmt2c	27399.5	-1.16296	0.252974	-4.59714	4.28338e-06	2.5363e-05
NM_001081386	Cdh19	45.0535	-2.27889	0.593172	-3.84188	0.000122097	0.000537511
NM_001081391	Csmd3	349.947	-3.0865	0.512543	-6.02193	1.72348e-09	1.87509e-08
NM_001081397	Myo16	331.855	-1.81774	0.313943	-5.79003	7.03724e-09	6.83824e-08
NM_001081401	Adamts3	11.0153	-3.41447	0.919652	-3.71279	0.00020499	0.000858629
NM_001081411	Sclt1	268.894	-1.63364	0.300066	-5.44428	5.20154e-08	4.35988e-07
NM_001081417		5441.19	-0.963915	0.220871	-4.36415	1.27615e-05	6.90742e-05
NM_001081418	Gltscr1	1419.76	-0.903552	0.265046	-3.40904	0.000651926	0.0024199
NM_001081422	Bod1l	12465.9	-0.852858	0.205529	-4.14958	3.33079e-05	0.000165808
NM_001081429	Ccdc15	1229.71	-0.84488	0.26417	-3.19824	0.00138267	0.00471169
NM_001081430	Naa30	4886.01	-1.39354	0.389964	-3.57351	0.000352224	0.00140298
NM_001081433	Ankrd44	15536.8	-1.2345	0.331768	-3.72098	0.000198448	0.000834219
NM_001081453	Nin	3427.15	-1.76003	0.417023	-4.22046	2.43804e-05	0.00012514
NM_001081471	Mettl7a3	135.308	-2.37817	0.413412	-5.75255	8.79081e-09	8.43424e-08
NM_001081477	Brwd3	5023.8	-2.24482	0.21843	-10.2771	8.93961e-25	6.92729e-23
NM_001081652	Nacad	154.744	-2.04538	0.416048	-4.91621	8.82345e-07	5.94018e-06
NM_001081662	C86695	1574.68	-1.44253	0.305833	-4.71674	2.39656e-06	1.49728e-05
NM_001081671	Cldn34b2	105.421	-3.09596	0.418237	-7.4024	1.3374e-13	2.62096e-12
NM_001081695	Dnmt3l	11.9115	-3.89491	0.937501	-4.15457	3.25905e-05	0.00016261
NM_001081750	Zfp664	8262.06	-1.3665	0.235676	-5.79821	6.70257e-09	6.53393e-08
NM_001081956	Akap17b	4882.56	-1.17549	0.252131	-4.66221	3.12836e-06	1.91355e-05
NM_001082414	Sh3d19	2406.47	-0.818494	0.236826	-3.4561	0.000548052	0.00208147
NM_001083118	Terf2	149.512	-1.09577	0.349054	-3.13924	0.00169386	0.00563804
NM_001085355	Arid1b	5434.28	-0.773571	0.213356	-3.62572	0.000288156	0.00117427
NM_001085501	Ppp1r3d	605.106	-1.15435	0.258113	-4.47228	7.7391e-06	4.3647e-05
NM_001085506	Magea10	350.834	-4.35858	0.355278	-12.2681	1.34373e-34	2.82242e-32
NM_001085508	Tmem8b	298.35	-0.973119	0.281873	-3.45233	0.00055577	0.00210552
NM_001085522	Gm13251	36.4632	-2.27392	0.655562	-3.46866	0.000523062	0.00200057
NM_001097644	Ccnyl1	2286.61	-1.01256	0.23249	-4.3553	1.32886e-05	7.1697e-05
NM_001099276	Pik3c2b	3397.33	-0.910377	0.243119	-3.74458	0.000180698	0.000767675
NM_001099277	Zfp541	288.45	-1.3212	0.333722	-3.95898	7.52703e-05	0.000345693
NM_001099323	Zkscan16	1088.02	-0.942516	0.229972	-4.09839	4.16029e-05	0.000203893
NM_001100182	Cyp2j12	74.9345	-1.84	0.418343	-4.3983	1.09103e-05	5.99904e-05
NM_001100452	Gltscr1l	757.379	-1.35734	0.302671	-4.48452	7.3079e-06	4.13996e-05
NM_001100461	Pnma5	553.136	-5.12086	0.322191	-15.8939	6.98942e-57	7.58252e-54
NM_001101534	Sult2a4	135.623	-2.23871	0.555767	-4.02815	5.62181e-05	0.000266575
NM_001101606	Gm8817	5.53624	-3.65516	1.17065	-3.12233	0.00179426	0.00593579
NM_001103158	Gm13242	103.966	-3.23811	0.620086	-5.22203	1.76971e-07	1.35613e-06
NM_001103179	Brwd1	724.688	-2.65855	0.314124	-8.46338	2.59731e-17	8.00162e-16
NM_001104525	Cyp2c69	28.7311	-6.05669	0.928758	-6.52128	6.97108e-11	9.25496e-10
NM_001105179	Vmn2r51	70.7968	-5.60309	0.726899	-7.70821	1.27594e-14	2.84986e-13
NM_001105254	Gm10436	9163.72	-2.12812	0.362613	-5.86885	4.38818e-09	4.42842e-08
NM_001105561	Gm11545	8673.7	-1.94559	0.32474	-5.99123	2.08264e-09	2.23226e-08
NM_001109685	Kazn	453.239	-1.01018	0.270606	-3.73304	0.000189183	0.000799473
NM_001109749	Cntn4	446.943	-2.22524	0.347388	-6.40561	1.49765e-10	1.89552e-09
NM_001109906	Stau1	226.493	-1.64164	0.346872	-4.7327	2.21548e-06	1.38987e-05
NM_001109975	Synpo	18.7134	-3.28773	0.872594	-3.76776	0.000164716	0.000704311
NM_001110013	Tmtc3	2164.89	-2.94443	0.317807	-9.26482	1.95399e-20	8.91205e-19
NM_001110017	Dzip3	309.158	-1.44977	0.373049	-3.88628	0.000101792	0.000455245
NM_001110140	Atp2a2	6725.67	-1.23626	0.342532	-3.60918	0.000307167	0.00124175
NM_001110242	1810043H04Rik	65.019	-2.18926	0.481659	-4.54525	5.48707e-06	3.1784e-05
NM_001110784	Xlr3a	292.628	-1.39084	0.308892	-4.50267	6.71057e-06	3.8287e-05
NM_001110832	Nfya	76.3035	-1.75117	0.447078	-3.91692	8.96861e-05	0.000406007
NM_001111016	Nav2	124.415	-2.69562	0.338776	-7.95693	1.76366e-15	4.36974e-14
NM_001111027	Runx1t1	55.0677	-2.50969	0.447959	-5.6025	2.11287e-08	1.89771e-07
NM_001111107	Zfp322a	74.2981	-3.10288	0.472365	-6.56882	5.07142e-11	6.85273e-10
NM_001111118	Rad51ap2	193.384	-2.03768	0.435904	-4.67461	2.94509e-06	1.80873e-05
NM_001111121	Ccdc6	30647.1	-2.91457	0.236836	-12.3063	8.38153e-35	1.84721e-32
NM_001111286	Omt2a	656.428	-2.08399	0.23977	-8.69164	3.57255e-18	1.21932e-16
NM_001111311	Lrrfip1	7558.84	-2.1854	0.265904	-8.21877	2.05602e-16	5.70875e-15
NM_001112744	Arhgef16	914.888	-1.27049	0.252704	-5.02757	4.96733e-07	3.52871e-06
NM_001113354	Phf8	3080.37	-1.18118	0.245143	-4.81831	1.44779e-06	9.37298e-06
NM_001113416	Epb4.1l5	871.147	-1.68244	0.248523	-6.76976	1.29e-11	1.90403e-10
NM_001113417	Thrb	12.0471	-2.96187	0.882117	-3.35769	0.000785974	0.00285994
NM_001113514	Itga9	71.4993	-1.31878	0.437579	-3.01381	0.00257993	0.00815824
NM_001114079	Pabpc1l	1405.28	-1.05901	0.292649	-3.6187	0.000296088	0.00120272
NM_001114328	Ccpg1	444.764	-1.50106	0.271191	-5.53507	3.11099e-08	2.7155e-07
NM_001114332	Slc16a10	4909.83	-1.54681	0.352492	-4.38823	1.14279e-05	6.25465e-05
NM_001114333	Grm1	5.19129	-4.11907	1.24393	-3.31134	0.000928495	0.00331499
NM_001114334	Rps6kb1	954.633	-1.01881	0.251164	-4.05634	4.98483e-05	0.000239436
NM_001114361	Eml4	390.775	-2.28067	0.465873	-4.89547	9.80702e-07	6.54721e-06
NM_001114660	Scfd2	132.528	-1.49578	0.34038	-4.39443	1.11063e-05	6.08962e-05
NM_001114663	Plcl1	379.323	-1.36675	0.399373	-3.42224	0.000621083	0.00232302
NM_001122675	Zcchc2	86.4375	-2.05735	0.45837	-4.48839	7.17622e-06	4.07448e-05
NM_001122832	Eps15l1	250.424	-1.83829	0.312491	-5.88269	4.03651e-09	4.10351e-08
NM_001126325	Gm13088	91.7108	-2.12929	0.531508	-4.00613	6.17214e-05	0.000289955
NM_001126489	Zfp735	1460.87	-4.27516	0.436318	-9.79826	1.14538e-22	7.21829e-21
NM_001127188	Zfp534	49.011	-2.64712	0.75212	-3.51955	0.000432284	0.00168982
NM_001127189	Gm13157	225.05	-1.24159	0.405858	-3.05918	0.00221943	0.00715836
NM_001127376	Wisp3	41.9693	-1.63888	0.537371	-3.04981	0.00228986	0.00734409
NM_001128086	Anks1b	93.9816	-1.17234	0.362183	-3.23687	0.00120849	0.0041734
NM_001128151	Cecr2	13522.1	-0.987599	0.292172	-3.3802	0.000724329	0.00266242
NM_001128198		3102.11	-0.747143	0.213418	-3.50085	0.000463778	0.00179782
NM_001128625	Gm364	531.769	-2.83596	0.446831	-6.34683	2.19797e-10	2.70744e-09
NM_001130194	Best2	71.2625	-1.46717	0.406931	-3.60545	0.000311613	0.00125772
NM_001134767	Ccdc62	979.135	-2.44188	0.440183	-5.54741	2.89928e-08	2.54975e-07
NM_001137547	Usp51	141.708	-2.9423	0.543242	-5.41619	6.08837e-08	5.05025e-07
NM_001142697	Tpgs2	241.374	-1.92025	0.367065	-5.23137	1.68261e-07	1.29395e-06
NM_001142952	Fam46c	11441.6	-1.72062	0.195977	-8.77973	1.63862e-18	5.84209e-17
NM_001142957	Zfp955b	1613.8	-2.91586	0.321704	-9.06378	1.26011e-19	5.15863e-18
NM_001145209	Hbs1l	35.3908	-2.46667	0.819953	-3.00831	0.00262703	0.00828555
NM_001145433	Smim20	206.43	-1.4127	0.33588	-4.20597	2.59969e-05	0.000132586
NM_001145676	2210408I21Rik	39.2842	-3.30476	0.58542	-5.64511	1.6508e-08	1.50766e-07
NM_001145978	Parp4	902.557	-1.11402	0.323728	-3.44123	0.000579079	0.00218293
NM_001146073	Hexdc	28.2963	-1.89687	0.597999	-3.17203	0.00151377	0.00510233
NM_001146196	Scin	61.5968	-5.63104	0.659395	-8.53972	1.34547e-17	4.31119e-16
NM_001146689	Ezh2	75.3496	-1.65328	0.388944	-4.25069	2.13116e-05	0.000110526
NM_001159492	Gpatch8	9628.93	-0.799065	0.216499	-3.69084	0.000223512	0.00093082
NM_001159496	Ppm1b	626.012	-1.31382	0.25768	-5.09866	3.42075e-07	2.48704e-06
NM_001159693	Zar1l	1678.88	-1.7439	0.338067	-5.15844	2.49016e-07	1.85304e-06
NM_001160353	Grm2	1222.05	-1.17947	0.212294	-5.55581	2.76325e-08	2.4457e-07
NM_001160370	A830018L16Rik	4.42329	-3.95244	1.25207	-3.15673	0.00159548	0.00534571
NM_001161516	Dctd	7.77362	-3.29431	1.0398	-3.16821	0.00153381	0.00516072
NM_001161665	Kif26b	185.498	-1.63455	0.415447	-3.93443	8.33928e-05	0.000380038
NM_001161838	Ptprr	103.944	-1.26987	0.42063	-3.01897	0.00253637	0.00803386
NM_001162926	Fam84b	3348.5	-1.29977	0.298336	-4.35673	1.32021e-05	7.12808e-05
NM_001163138	Card6	766.915	-1.68185	0.306382	-5.48937	4.03373e-08	3.45151e-07
NM_001163223	Zfp804b	39.6975	-3.54417	0.566462	-6.25667	3.93279e-10	4.69356e-09
NM_001163270	Baiap3	64.5098	-1.7005	0.490649	-3.46582	0.000528613	0.00201926
NM_001163425	Myeov2	773.643	-0.876007	0.28692	-3.05315	0.00226456	0.00727919
NM_001163471	Hectd2	51.4606	-3.48266	0.686708	-5.07153	3.94627e-07	2.83385e-06
NM_001163486	Hsd17b13	60.4318	-2.4314	0.634318	-3.83309	0.000126543	0.000555434
NM_001163493	Stard13	156.514	-1.22038	0.31796	-3.83817	0.000123954	0.000545051
NM_001163554	Pou2f2	36.6864	-4.48844	0.667938	-6.71985	1.81914e-11	2.62634e-10
NM_001163622	Prepl	174.782	-1.86483	0.391198	-4.76697	1.87014e-06	1.18844e-05
NM_001163631	Satb1	9.50338	-4.02464	1.05334	-3.82083	0.000133005	0.000581318
NM_001163768	Tctex1d1	12.4801	-2.59137	0.854142	-3.03388	0.00241428	0.00770661
NM_001163775	Taok2	576.277	-1.39754	0.242231	-5.76946	7.95254e-09	7.66391e-08
NM_001164056	Pld1	892.439	-2.23139	0.235754	-9.46491	2.93819e-21	1.48751e-19
NM_001164220	Trim13	254.876	-2.25302	0.314563	-7.16236	7.93025e-13	1.39404e-11
NM_001164237	Rnf41	70.2052	-1.63789	0.460613	-3.5559	0.000376685	0.00149142
NM_001164284	C87414	45.3018	-2.73395	0.785174	-3.48197	0.000497747	0.00191368
NM_001164367	Rab11fip2	106.103	-1.66885	0.414402	-4.02713	5.64619e-05	0.000267564
NM_001164504	Rnf165	608.316	-2.70837	0.412498	-6.56578	5.17624e-11	6.98195e-10
NM_001164532	Cpsf4l	61.8075	-1.47048	0.449973	-3.26793	0.00108338	0.00379658
NM_001164581	Zfp961	1936.39	-1.3575	0.369158	-3.6773	0.000235716	0.000977624
NM_001164676	Zfp229	934.427	-4.06916	0.45736	-8.89707	5.73401e-19	2.18814e-17
NM_001164686	Tmem29	538.644	-0.850131	0.244394	-3.47853	0.000504181	0.00193616
NM_001164767	Robo3	100.236	-3.60893	0.622954	-5.79325	6.90365e-09	6.71702e-08
NM_001164805	Thsd7a	1176.37	-1.73403	0.282208	-6.1445	8.02165e-10	9.12606e-09
NM_001165942	Nsun6	33.988	-2.85845	0.670501	-4.26315	2.01562e-05	0.000105272
NM_001165980	Dcaf17	207.982	-1.34655	0.404159	-3.33172	0.000863097	0.00310603
NM_001165996	Musk	31.1944	-2.03727	0.645812	-3.15459	0.00160723	0.00537797
NM_001166063	Ccdc152	23.0961	-3.51149	0.945493	-3.71392	0.000204072	0.000855018
NM_001166066	Mroh2b	93.609	-2.68506	0.491549	-5.46245	4.69614e-08	3.9603e-07
NM_001166138	Armc8	365.509	-1.95002	0.300532	-6.48857	8.66569e-11	1.12877e-09
NM_001166207	Dpy19l2	17.3208	-5.18237	1.06542	-4.86415	1.14947e-06	7.55763e-06
NM_001166210	Myh15	75.2618	-1.99361	0.453175	-4.39921	1.08645e-05	5.98077e-05
NM_001166213	Fam129c	75.4261	-1.64505	0.418849	-3.92754	8.58191e-05	0.000390129
NM_001166632	Havcr1	4.28476	-3.8632	1.25935	-3.06761	0.00215776	0.00698319
NM_001167777	Asxl3	492.661	-1.35744	0.330386	-4.10864	3.98002e-05	0.000195563
NM_001167937	D6Ertd527e	121.971	-1.58407	0.485243	-3.26448	0.00109664	0.00383772
NM_001167983	Sipa1l1	53.6322	-1.33229	0.440383	-3.0253	0.00248391	0.00789568
NM_001168477	Ttc23	111.711	-2.65606	0.3768	-7.049	1.80212e-12	3.04117e-11
NM_001170800	Ipcef1	4622.36	-0.949791	0.250679	-3.78887	0.000151331	0.000652218
NM_001170847	Rbm20	335.268	-3.90051	0.330586	-11.7988	3.95935e-32	6.19944e-30
NM_001170855	Trim36	33.4751	-1.92341	0.650907	-2.95496	0.00312706	0.00967288
NM_001170976	Dbndd1	37.9194	-2.18436	0.649621	-3.36252	0.000772355	0.00282052
NM_001171026	Os9	35.103	-2.04952	0.694968	-2.94909	0.00318709	0.00983254
NM_001171147	Yap1	50.1627	-2.20805	0.499593	-4.41969	9.88432e-06	5.49298e-05
NM_001171512	Obscn	161.943	-1.95367	0.364767	-5.35596	8.5105e-08	6.89741e-07
NM_001172069	Senp8	28.4776	-2.20907	0.572365	-3.85954	0.0001136	0.000503018
NM_001172160	Flrt3	12.4404	-3.54336	1.01092	-3.50507	0.00045649	0.0017741
NM_001173459	LOC100038947	7.99594	-4.82297	1.18964	-4.05413	5.03222e-05	0.000241559
NM_001173460	Sirpb1b	20.4957	-5.54111	0.965241	-5.74065	9.43128e-09	8.98634e-08
NM_001173500	G630090E17Rik	5.56164	-4.31586	1.22498	-3.52322	0.000426336	0.00166757
NM_001177419	Fbxw28	866.951	-1.2483	0.285585	-4.37103	1.2366e-05	6.71486e-05
NM_001177420	Fbxw28	354.081	-2.0976	0.326913	-6.41638	1.39552e-10	1.77365e-09
NM_001177525	EU599041	43.6088	-2.25671	0.540459	-4.17554	2.97281e-05	0.000149507
NM_001177542	C87977	21696.7	-2.6603	0.323269	-8.22938	1.8819e-16	5.24447e-15
NM_001177550	Zfp442	203.433	-3.19766	0.443267	-7.21385	5.43917e-13	9.74176e-12
NM_001177570	Zfp616	2498.71	-5.68533	0.408819	-13.9067	5.76704e-44	2.65424e-41
NM_001177581	7420461P10Rik	957.907	-4.24594	0.326139	-13.0188	9.56691e-39	3.02713e-36
NM_001177624	Slc5a12	12.6315	-2.80355	0.943619	-2.97106	0.0029677	0.00924016
NM_001177770	Clcc1	186.216	-3.03003	0.39395	-7.69141	1.45518e-14	3.21707e-13
NM_001177832	Gm10324	56.3911	-1.90439	0.529441	-3.59699	0.000321926	0.00129505
NM_001177883	Elavl2	655.573	-1.66376	0.417334	-3.98664	6.70142e-05	0.000311353
NM_001190352	Tmem132b	805.054	-2.29055	0.367883	-6.2263	4.7757e-10	5.63584e-09
NM_001190804	Dnajb11	1533.95	-1.06823	0.265429	-4.02454	5.70869e-05	0.000270189
NM_001190817	Dnajc1	488.231	-1.59539	0.271921	-5.86713	4.43413e-09	4.46384e-08
NM_001195074	Kcnmb3	28.7356	-2.68683	0.767572	-3.50043	0.000464507	0.00179926
NM_001195086	Ppfia1	134.492	-3.37874	0.397596	-8.49792	1.93015e-17	6.09463e-16
NM_001195229	Nek10	491.9	-1.74895	0.277214	-6.30903	2.80798e-10	3.42002e-09
NM_001195579	Trpc5os	29.9219	-4.92967	0.7939	-6.20943	5.31773e-10	6.22231e-09
NM_001195687	Sgol2b	328.956	-5.82235	0.399183	-14.5857	3.4648e-48	2.10493e-45
NM_001198587	Nrxn3	23.1938	-5.38658	0.905089	-5.95143	2.65806e-09	2.7861e-08
NM_001198933	Me1	310.566	-1.45847	0.352996	-4.1317	3.60096e-05	0.000178322
NM_001198955	Gm7694	446.401	-1.37259	0.382162	-3.59165	0.000328586	0.00131886
NM_001199020	Angel2	96.7914	-3.11103	0.505395	-6.15563	7.47794e-10	8.57169e-09
NM_001199048	Zfp942	266.009	-2.6131	0.438572	-5.95819	2.55042e-09	2.68625e-08
NM_001199213	Serpinb12	12.0424	-3.5146	0.919798	-3.82106	0.000132882	0.000580947
NM_001199274	Mat2b	955.376	-0.64143	0.209042	-3.06843	0.00215189	0.00696568
NM_001199330	AI987944	325.254	-1.99273	0.393733	-5.06113	4.16776e-07	2.98163e-06
NM_001201390	E330021D16Rik	14113.2	-3.6118	0.279574	-12.9189	3.51979e-38	1.02805e-35
NM_001205095	Gm4944	67.977	-1.59853	0.483235	-3.30798	0.0009397	0.00335342
NM_001205101	Gm13212	82.7638	-3.36661	0.462544	-7.27846	3.37658e-13	6.27705e-12
NM_001205362	Dcun1d1	160.161	-1.5892	0.320644	-4.95627	7.18608e-07	4.93187e-06
NM_001206851	Usp44	8.35868	-4.11099	1.09024	-3.77072	0.000162778	0.000697002
NM_001243021	Zfp939	537.01	-1.96962	0.326361	-6.0351	1.58868e-09	1.73911e-08
NM_001243067	Zfp433	92.2882	-1.6479	0.387955	-4.24766	2.16015e-05	0.000111936
NM_001243223	Rgsl1	30.7551	-1.93309	0.638622	-3.02697	0.00247017	0.0078652
NM_001243908	Zfp383	794.539	-1.76949	0.361561	-4.89403	9.87924e-07	6.58674e-06
NM_001252587	Zmynd8	171.129	-3.76423	0.750233	-5.01742	5.23705e-07	3.69955e-06
NM_001252661	5830473C10Rik	59.6171	-3.88161	0.598213	-6.48867	8.65967e-11	1.12877e-09
NM_001253831	Atp2c1	8.68492	-4.3531	1.10207	-3.94993	7.8174e-05	0.000357623
NM_001256065	Gm5141	247.932	-2.84527	0.53003	-5.36812	7.95602e-08	6.49656e-07
NM_001256380	Prdm2	1167.25	-1.39882	0.341294	-4.09856	4.15725e-05	0.00020381
NM_001267711	Eef2k	530.625	-1.74961	0.295857	-5.91372	3.34475e-09	3.46285e-08
NM_001270475	Mical3	747.563	-1.18923	0.224767	-5.29093	1.21699e-07	9.55722e-07
NM_001270537	Bin2	3250.71	-0.594519	0.201019	-2.95753	0.00310115	0.00960643
NM_001270793	Gm2042	1379.65	-2.05277	0.374167	-5.48624	4.10573e-08	3.50719e-07
NM_001271533	Spag16	96.9323	-2.13131	0.648429	-3.28689	0.00101301	0.00358304
NM_001271542	Cnot7	94.2685	-3.2496	0.532065	-6.10752	1.01188e-09	1.13841e-08
NM_001271548	Gm715	117.157	-1.94925	0.444979	-4.38055	1.1838e-05	6.44892e-05
NM_001271574	Tktl2	558.185	-3.12701	0.362861	-8.61766	6.8336e-18	2.2861e-16
NM_001271798	Pcdh9	95.0746	-2.96094	0.383439	-7.72206	1.14461e-14	2.58724e-13
NM_007391	Acrv1	6.66909	-3.48551	1.12187	-3.10686	0.00189084	0.00622141
NM_007395	Acvr1b	1585.62	-1.20573	0.297429	-4.05384	5.03826e-05	0.000241773
NM_007403	Adam8	106.301	-1.93593	0.385708	-5.01916	5.18974e-07	3.66954e-06
NM_007407	Adcyap1r1	6.0018	-4.44416	1.21494	-3.65791	0.000254277	0.00104774
NM_007408	Plin2	166.996	-1.83087	0.440503	-4.15632	3.23411e-05	0.000161419
NM_007416	Adra1b	3.97003	-3.80785	1.26071	-3.02041	0.00252435	0.00800582
NM_007422	Adss	14680.5	-0.737876	0.220254	-3.35011	0.000807784	0.00292947
NM_007439	Alk	7.45055	-4.10906	1.12441	-3.65441	0.000257777	0.00106101
NM_007440	Alox12	209.816	-1.24234	0.372437	-3.3357	0.000850839	0.00306803
NM_007461	Apba2	166.041	-1.35533	0.406801	-3.33169	0.000863217	0.00310603
NM_007462	Apc	11101.4	-1.04072	0.275696	-3.77488	0.000160085	0.000686245
NM_007464	Birc3	11004.3	-1.76621	0.195295	-9.04379	1.51327e-19	6.16181e-18
NM_007507	Atp5k	443.706	-0.917787	0.249279	-3.68177	0.000231618	0.000962731
NM_007510	Atp6v1e1	849.082	-1.15541	0.332655	-3.47331	0.00051408	0.00197108
NM_007548	Prdm1	1298.46	-2.26022	0.229606	-9.84392	7.28172e-23	4.70616e-21
NM_007555	Bmp5	678.919	-3.98935	0.279421	-14.2772	3.03525e-46	1.77306e-43
NM_007560	Bmpr1b	5567.5	-1.52867	0.307122	-4.97739	6.44467e-07	4.45727e-06
NM_007561	Bmpr2	4418.26	-1.45463	0.270985	-5.36795	7.9636e-08	6.49926e-07
NM_007562	Bnc1	6118.22	-1.16579	0.235434	-4.95167	7.35802e-07	5.03621e-06
NM_007563	Bpgm	51837.3	-1.52982	0.281746	-5.42979	5.64217e-08	4.6981e-07
NM_007585	Anxa2	99.9034	-1.59583	0.4654	-3.42895	0.000605924	0.00227229
NM_007641	Ms4a1	630.544	-4.44646	0.482107	-9.22297	2.8898e-20	1.29853e-18
NM_007650	Cd5	13.1577	-4.81598	1.03127	-4.66996	3.01257e-06	1.84868e-05
NM_007658	Cdc25a	1917.15	-0.821751	0.219876	-3.73734	0.000185981	0.000787257
NM_007662	Cdh15	22.7331	-4.63765	0.817364	-5.67391	1.39572e-08	1.291e-07
NM_007668	Cdk5	165.659	-1.65215	0.411507	-4.01487	5.94798e-05	0.000280552
NM_007672	Cdr2	3181.24	-1.02266	0.272887	-3.74755	0.000178572	0.000759279
NM_007691	Chek1	9628.6	-0.983966	0.298987	-3.291	0.000998321	0.00353851
NM_007708	Cit	2843.85	-1.39658	0.284873	-4.90245	9.46483e-07	6.33547e-06
NM_007712	Clk2	115.064	-1.04253	0.317587	-3.28267	0.00102828	0.00362946
NM_007723	Cnga1	57.3196	-4.44779	0.642955	-6.91773	4.58946e-12	7.23829e-11
NM_007727	Cntn1	26.9102	-2.0474	0.673305	-3.04082	0.00235932	0.00754452
NM_007733	Col19a1	52.7287	-4.40417	0.709729	-6.20543	5.4549e-10	6.37301e-09
NM_007759	Crabp2	132.158	-4.11243	0.60614	-6.78461	1.16397e-11	1.72978e-10
NM_007771	Cry1	2708.14	-1.88125	0.214639	-8.76472	1.87245e-18	6.61368e-17
NM_007772	Hivep1	28285.3	-0.922958	0.31099	-2.9678	0.00299939	0.00933021
NM_007790	Smc3	11597.8	-0.708228	0.223813	-3.16437	0.00155421	0.00522243
NM_007801	Ctsh	1424.74	-1.90614	0.263664	-7.22944	4.85001e-13	8.77972e-12
NM_007810	Cyp19a1	252.189	-4.47406	0.511249	-8.75123	2.11034e-18	7.35133e-17
NM_007858	Diap1	1527.93	-0.826833	0.238955	-3.46021	0.000539758	0.00205614
NM_007869	Dnajc1	516.916	-0.960512	0.282828	-3.3961	0.000683539	0.00252286
NM_007882	Dsc3	75.6787	-2.26212	0.576193	-3.92597	8.63809e-05	0.000392331
NM_007889	Dvl3	1903.58	-1.04333	0.274175	-3.80535	0.000141607	0.000615371
NM_007891	E2f1	1057.81	-2.28279	0.389536	-5.86028	4.62084e-09	4.63243e-08
NM_007892	E2f5	6755.34	-0.968307	0.203704	-4.7535	1.99923e-06	1.26413e-05
NM_007896	Mapre1	6670.75	-1.16582	0.24216	-4.81424	1.47763e-06	9.54586e-06
NM_007914	Ehf	4074.19	-3.94447	0.243858	-16.1753	7.53841e-59	8.80718e-56
NM_007916	Ddx19a	7442.45	-1.0102	0.232928	-4.33695	1.44474e-05	7.75907e-05
NM_007919	Cela2a	8.55636	-3.85291	1.07719	-3.57681	0.000347811	0.00138795
NM_007929	Emp2	754.003	-1.24068	0.281404	-4.40891	1.0389e-05	5.73566e-05
NM_007936	Epha4	2350.01	-2.22701	0.369152	-6.03275	1.61189e-09	1.76252e-08
NM_007937	Epha5	30.0145	-3.20518	0.640871	-5.00129	5.69473e-07	3.98028e-06
NM_007938	Epha6	56.0247	-1.53894	0.473868	-3.24761	0.0011638	0.00403925
NM_007963	Mecom	99.9791	-2.21882	0.704949	-3.14749	0.00164681	0.0054983
NM_007964	Evi5	7233.5	-1.32602	0.211982	-6.25536	3.96589e-10	4.72423e-09
NM_007971	Ezh2	340.632	-2.19125	0.344715	-6.35671	2.06122e-10	2.55976e-09
NM_007976	F5	54.4967	-3.75486	0.610346	-6.15201	7.65062e-10	8.74982e-09
NM_007982	Ptk2	373.954	-1.45698	0.306414	-4.75494	1.98502e-06	1.25619e-05
NM_008002	Fgf10	119.595	-6.14856	0.561601	-10.9483	6.77225e-28	7.4534e-26
NM_008012	Akr1b8	139.059	-2.70794	0.339263	-7.98184	1.44173e-15	3.61337e-14
NM_008021	Foxm1	5677.93	-1.77889	0.209254	-8.50109	1.87812e-17	5.94269e-16
NM_008045	Fshb	17.6902	-2.18771	0.710485	-3.07918	0.00207572	0.00675377
NM_008057	Fzd7	558.833	-1.55495	0.264471	-5.87947	4.11572e-09	4.17008e-08
NM_008062	G6pdx	15940.6	-1.04098	0.231046	-4.50551	6.62144e-06	3.78212e-05
NM_008091	Gata3	86.2744	-4.02138	0.641505	-6.26866	3.64179e-10	4.36555e-09
NM_008095	Gbas	2524.53	-1.0121	0.308599	-3.27967	0.0010393	0.00366483
NM_008102	Gch1	713.901	-1.38242	0.302889	-4.56412	5.01602e-06	2.93351e-05
NM_008104	Gcm2	261.687	-1.53445	0.370851	-4.13766	3.50869e-05	0.000174037
NM_008124	Gjb1	105.689	-1.3053	0.424277	-3.07652	0.00209429	0.00680096
NM_008130	Gli3	6489.5	-1.59121	0.261154	-6.093	1.10817e-09	1.24203e-08
NM_008141	Gnat2	196.732	-3.45824	0.445931	-7.75509	8.82783e-15	2.03455e-13
NM_008145	Gnrh1	141.336	-4.46937	0.617618	-7.23646	4.60558e-13	8.3973e-12
NM_008153	Cmklr1	882.939	-1.88088	0.327976	-5.73479	9.76304e-09	9.28497e-08
NM_008154	Gpr3	1248.11	-1.54672	0.331681	-4.66328	3.11211e-06	1.90515e-05
NM_008174	Grm8	212.094	-3.83479	0.432142	-8.87392	7.06164e-19	2.66796e-17
NM_008175	Grn	854.444	-1.31228	0.324636	-4.0423	5.29288e-05	0.000252873
NM_008177	Grpr	8.96522	-4.94721	1.18183	-4.18606	2.83844e-05	0.00014351
NM_008179	Gspt2	2146.59	-3.01563	0.222626	-13.5457	8.39593e-42	3.18794e-39
NM_008186	Gtf2h1	689.472	-0.976843	0.266188	-3.66975	0.000242792	0.0010045
NM_008192	Gucy2e	4398.67	-1.42796	0.373202	-3.82623	0.000130119	0.00056974
NM_008206	H2-Oa	38.9113	-3.5292	0.791834	-4.457	8.31153e-06	4.66436e-05
NM_008211	H3f3b	2683.33	-1.31402	0.284094	-4.6253	3.74059e-06	2.24376e-05
NM_008216	Has2	8.53668	-3.3756	1.10453	-3.05616	0.00224195	0.00721872
NM_008217	Has3	1163.96	-2.94793	0.375993	-7.84039	4.49134e-15	1.06253e-13
NM_008247	Ppap2a	51.24	-1.92529	0.479775	-4.01291	5.99744e-05	0.00028271
NM_008251	Hmgn1	3489.87	-0.901012	0.224547	-4.01257	6.00604e-05	0.000283028
NM_008252	Hmgb2	2223.7	-1.71423	0.243083	-7.05202	1.76341e-12	2.98581e-11
NM_008262	Onecut1	99.0248	-1.97866	0.384892	-5.14082	2.73535e-07	2.0236e-06
NM_008292	Hsd17b4	1116.65	-0.894411	0.248677	-3.59667	0.000322315	0.00129574
NM_008296	Hsf1	1764.33	-2.26775	0.324204	-6.99481	2.65612e-12	4.35649e-11
NM_008314	Htr5a	1484.46	-3.16554	0.429381	-7.37232	1.67688e-13	3.261e-12
NM_008316	Hus1	3687.3	-1.43887	0.358688	-4.01147	6.03422e-05	0.000284267
NM_008320	Irf8	293.06	-0.977492	0.254122	-3.84655	0.000119791	0.000528123
NM_008325	Idua	356.441	-1.15321	0.359876	-3.20447	0.00135309	0.00462335
NM_008349	Il10rb	125.106	-1.19225	0.348128	-3.42475	0.00061537	0.0023043
NM_008354	Il12rb2	204.204	-2.18103	0.510584	-4.27163	1.94045e-05	0.000101521
NM_008371	Il7	1026.07	-2.48163	0.273302	-9.08021	1.08368e-19	4.50931e-18
NM_008397	Itga6	4988.62	-1.28191	0.219183	-5.8486	4.95721e-09	4.95156e-08
NM_008399	Itgae	9.43625	-2.84605	0.904379	-3.14697	0.00164973	0.00550685
NM_008434	Kcnq1	309.042	-1.06279	0.318108	-3.34096	0.00083489	0.0030184
NM_008441	Kif1b	1558.78	-1.89071	0.229103	-8.25267	1.54894e-16	4.35654e-15
NM_008444	Kif3b	683.238	-1.86305	0.250684	-7.43188	1.07067e-13	2.12844e-12
NM_008449	Kif5c	2120.18	-3.66975	0.213579	-17.1822	3.61075e-66	1.0968e-62
NM_008466	Kpna3	6927.79	-1.01907	0.336214	-3.03101	0.00243738	0.00777383
NM_008482	Lamb1	24117.8	-0.761174	0.205081	-3.71157	0.000205975	0.000862515
NM_008497	Lhb	105.19	-3.19947	0.474528	-6.74243	1.55763e-11	2.27037e-10
NM_008509	Lpl	772.848	-1.64689	0.376365	-4.37578	1.21001e-05	6.58463e-05
NM_008512	Lrp1	2745.93	-1.79591	0.326549	-5.49966	3.80531e-08	3.26895e-07
NM_008513	Lrp5	2982.6	-0.712859	0.217577	-3.27635	0.00105158	0.00370072
NM_008514	Lrp6	9041.96	-1.42955	0.309907	-4.61284	3.97206e-06	2.36672e-05
NM_008521	Ltc4s	68.8632	-2.55761	0.524786	-4.87362	1.09571e-06	7.23549e-06
NM_008533	Cd180	873.734	-2.72509	0.352865	-7.72276	1.13838e-14	2.58057e-13
NM_008552	Mas1	29.7493	-4.88082	0.812671	-6.0059	1.90278e-09	2.05983e-08
NM_008555	Masp1	94.2059	-1.33589	0.451755	-2.95711	0.00310539	0.00961758
NM_008575	Mdm4	57061.8	-2.99745	0.219045	-13.6842	1.26269e-42	5.04678e-40
NM_008586	Mep1b	71.8462	-2.61494	0.541626	-4.82794	1.37954e-06	8.98092e-06
NM_008605	Mmp12	108.007	-1.79992	0.366419	-4.91218	9.00716e-07	6.05045e-06
NM_008625	Mrc1	522.388	-4.59024	0.344943	-13.3072	2.10123e-40	7.25305e-38
NM_008634	Map1b	18287.2	-1.75601	0.284963	-6.16223	7.17272e-10	8.25924e-09
NM_008650	Mut	317.756	-1.68938	0.485186	-3.48193	0.000497823	0.00191368
NM_008670	Naip1	526.226	-2.94502	0.291319	-10.1093	5.0266e-24	3.56747e-22
NM_008679	Ncoa3	6211.47	-1.53536	0.195726	-7.84446	4.34805e-15	1.03024e-13
NM_008682	Nedd1	2106.97	-1.31871	0.283361	-4.6538	3.25875e-06	1.97998e-05
NM_008690	Nfkbie	58.4076	-2.62798	0.516223	-5.09079	3.56581e-07	2.58016e-06
NM_008697	Nin	544.82	-2.14792	0.295802	-7.26134	3.83279e-13	7.0732e-12
NM_008702	Nlk	4552.64	-1.23168	0.317015	-3.88523	0.000102234	0.00045682
NM_008706	Nqo1	67.2559	-1.72464	0.573384	-3.00783	0.00263124	0.00829631
NM_008719	Npas2	496.572	-2.54948	0.255962	-9.96041	2.27121e-23	1.50634e-21
NM_008720	Npc1	5581.58	-0.937659	0.301996	-3.10487	0.00190363	0.00625537
NM_008737	Nrp1	587.785	-1.83064	0.360942	-5.07184	3.93997e-07	2.83067e-06
NM_008739	Nsd1	10753.2	-2.46792	0.200543	-12.3062	8.392e-35	1.84721e-32
NM_008744	Ntn1	165.489	-3.04203	0.383777	-7.92656	2.253e-15	5.51912e-14
NM_008759	Sebox	502.984	-3.64605	0.289595	-12.5902	2.39128e-36	6.15573e-34
NM_008779	Cntn3	27.4921	-3.55532	0.782562	-4.54318	5.54122e-06	3.20854e-05
NM_008798	Pdcd1	8.06079	-3.96739	1.12507	-3.52634	0.000421344	0.00165102
NM_008801	Pde6d	2633.44	-1.97208	0.293384	-6.72183	1.79461e-11	2.59586e-10
NM_008806	Pde6b	170.327	-3.32313	0.685258	-4.84946	1.23797e-06	8.1184e-06
NM_008814	Pdx1	60.0961	-3.08803	0.527301	-5.85629	4.73315e-09	4.74189e-08
NM_008830	Abcb4	114.007	-2.02946	0.341831	-5.93703	2.9023e-09	3.02749e-08
NM_008838	Pigf	559.723	-1.00059	0.247478	-4.04316	5.27348e-05	0.000252184
NM_008839	Pik3ca	2168.17	-1.6645	0.27718	-6.00512	1.91195e-09	2.06829e-08
NM_008855	Prkcb	147.84	-1.88933	0.565755	-3.33949	0.00083931	0.00303294
NM_008867	Pla2r1	78.8477	-3.4873	0.481633	-7.24058	4.46784e-13	8.17561e-12
NM_008872	Plat	22986	-1.25141	0.300807	-4.16017	3.18018e-05	0.00015904
NM_008876	Pld2	370.418	-2.11074	0.375105	-5.62707	1.83293e-08	1.65903e-07
NM_008882	Plxna2	1951.37	-1.98901	0.288755	-6.88822	5.64967e-12	8.80073e-11
NM_008886	Pms2	250.081	-1.61728	0.2816	-5.74316	9.29244e-09	8.87632e-08
NM_008891	Pnn	6495.72	-0.978229	0.21343	-4.58337	4.57532e-06	2.69759e-05
NM_008926	Prkg2	89.748	-3.9451	0.607231	-6.49688	8.20037e-11	1.07461e-09
NM_008929	Dnajc3	7993.52	-1.68374	0.211563	-7.95859	1.74011e-15	4.31843e-14
NM_008933	Prm2	27.9902	-3.17996	0.882382	-3.60384	0.000313552	0.00126419
NM_008939	Prss12	123.085	-3.65117	0.575322	-6.3463	2.20557e-10	2.71461e-09
NM_008943	Psen1	3677.69	-1.04904	0.205227	-5.1116	3.19443e-07	2.33592e-06
NM_008944	Psma2	2347.54	-0.902135	0.294594	-3.0623	0.00219644	0.00709326
NM_008949	Psmc3ip	534.105	-1.5732	0.285481	-5.51069	3.57429e-08	3.0835e-07
NM_008968	Ptgis	225.725	-1.54475	0.343718	-4.49422	6.98239e-06	3.97037e-05
NM_008979	Ptpn22	684.445	-0.849122	0.269902	-3.14604	0.00165499	0.00552077
NM_008984	Ptprm	240.473	-3.03128	0.570551	-5.31289	1.07898e-07	8.57988e-07
NM_008992	Abcd4	91.0714	-1.74592	0.56174	-3.10806	0.00188321	0.00620303
NM_009003	Rab4a	748.683	-0.724523	0.229411	-3.15819	0.00158755	0.00532383
NM_009005	Rab7	5837.95	-1.16938	0.234031	-4.99668	5.83264e-07	4.06358e-06
NM_009022	Aldh1a2	1393.45	-1.61601	0.31311	-5.16114	2.45446e-07	1.83096e-06
NM_009029	Rb1	4029.92	-1.88377	0.439116	-4.28991	1.78742e-05	9.4196e-05
NM_009031	Rbbp7	11731.9	-1.05428	0.247832	-4.25401	2.0998e-05	0.000109181
NM_009042	Reg1	23.7731	-2.32496	0.652949	-3.5607	0.000369863	0.00146518
NM_009043	Reg2	7.40781	-4.77697	1.18888	-4.01804	5.86835e-05	0.000277141
NM_009060	Rgn	282.286	-4.81785	0.461399	-10.4418	1.59724e-25	1.37055e-23
NM_009061	Rgs2	10679.9	-2.15294	0.200687	-10.7279	7.53019e-27	7.23852e-25
NM_009065	Rit2	97.0844	-3.84538	0.474752	-8.09975	5.50729e-16	1.43473e-14
NM_009067	Ralbp1	973.899	-1.62314	0.221013	-7.34409	2.07159e-13	3.9827e-12
NM_009071	Rock1	12641.2	-1.07343	0.329272	-3.26002	0.00111404	0.00388697
NM_009088	Polr1a	1139.42	-1.34811	0.289682	-4.65378	3.25912e-06	1.97998e-05
NM_009090	Polr2c	1167.22	-1.55001	0.214133	-7.23852	4.53623e-13	8.29077e-12
NM_009102	Rrh	121.151	-4.56599	0.425759	-10.7243	7.82415e-27	7.47378e-25
NM_009125	Atxn2	4949.37	-1.46471	0.293702	-4.98707	6.13031e-07	4.26315e-06
NM_009143	Sdf2	624.813	-1.69193	0.267183	-6.3325	2.41215e-10	2.95688e-09
NM_009145	Nptn	1344.58	-0.982012	0.319052	-3.0779	0.00208464	0.00677831
NM_009154	Sema5a	3333.29	-2.40977	0.275227	-8.75557	2.03067e-18	7.09007e-17
NM_009157	Map2k4	4468.7	-1.11923	0.340166	-3.29025	0.00100099	0.00354548
NM_009172	Siah1a	2933.87	-1.30216	0.400092	-3.25465	0.00113531	0.00395301
NM_009174	Siah2	5234.32	-1.45991	0.252729	-5.7766	7.62274e-09	7.35541e-08
NM_009193	Slbp	11240.4	-1.55724	0.324553	-4.79811	1.60171e-06	1.02732e-05
NM_009205	Slc3a1	6.20046	-3.35804	1.1346	-2.95966	0.00307981	0.00954809
NM_009206	Slc4a1ap	3431.26	-1.1136	0.270605	-4.11521	3.86821e-05	0.000190563
NM_009208	Slc4a3	31.2002	-1.75308	0.582253	-3.01086	0.00260507	0.00823087
NM_009256	Serpinb9	72.3951	-3.17827	0.651386	-4.87924	1.06493e-06	7.05373e-06
NM_009269	Sptlc1	1612	-0.967672	0.207804	-4.65665	3.21393e-06	1.95644e-05
NM_009294	Stx4a	293.83	-1.38445	0.294877	-4.695	2.66613e-06	1.65076e-05
NM_009297	Supt6	7718.56	-0.844909	0.263894	-3.2017	0.00136618	0.00466387
NM_009307	Syt2	67.3621	-1.94641	0.451587	-4.31016	1.6314e-05	8.65749e-05
NM_009320	Slc6a6	2711.76	-1.5571	0.258353	-6.02703	1.66997e-09	1.82078e-08
NM_009342	Dynlt1b	93.6654	-2.29227	0.693652	-3.30464	0.000950999	0.00338976
NM_009353	Terf2	383.455	-1.03964	0.30084	-3.45577	0.000548719	0.00208297
NM_009367	Tgfb2	5228.67	-1.00281	0.300876	-3.33296	0.000859269	0.00309402
NM_009368	Tgfb3	585.231	-1.44673	0.299334	-4.83315	1.34389e-06	8.76383e-06
NM_009390	Tll1	762.782	-1.77079	0.273296	-6.47939	9.20959e-11	1.19756e-09
NM_009406	Tnni3	62.6513	-2.20984	0.61956	-3.56678	0.00036139	0.00143648
NM_009408	Top1	9842.23	-1.51018	0.313817	-4.81229	1.49207e-06	9.63501e-06
NM_009410	Top3a	725.92	-1.12719	0.239884	-4.69891	2.61554e-06	1.62349e-05
NM_009428	Trpc5	75.1007	-4.55553	0.499097	-9.12754	7.0071e-20	2.97273e-18
NM_009445	Ttk	1105.98	-1.04009	0.312964	-3.32336	0.000889398	0.00318815
NM_009446	Tuba3a	1017.66	-2.10009	0.413037	-5.0845	3.68586e-07	2.66195e-06
NM_009447	Tuba4a	2306.88	-1.79283	0.268429	-6.67897	2.40623e-11	3.38832e-10
NM_009449	Tuba3b	108.412	-3.25395	0.517236	-6.29105	3.15326e-10	3.81304e-09
NM_009450	Tubb2a	3579.8	-1.41312	0.277444	-5.09333	3.5182e-07	2.55057e-06
NM_009453	Zrsr2	687.469	-1.08775	0.259378	-4.1937	2.74442e-05	0.000139359
NM_009472	Unc5c	7009.92	-1.76603	0.270449	-6.52999	6.5773e-11	8.77821e-10
NM_009478	Urod	179.589	-1.24836	0.335185	-3.7244	0.000195779	0.000824137
NM_009481	Usp9x	29326.6	-1.39637	0.239334	-5.83441	5.39825e-09	5.35874e-08
NM_009483	Kdm6a	9244.51	-1.35869	0.334198	-4.06553	4.79226e-05	0.000231063
NM_009513	Nrsn1	130.223	-1.93	0.340869	-5.66199	1.49626e-08	1.37395e-07
NM_009530	Atrx	26615	-1.44825	0.250384	-5.78411	7.28985e-09	7.05212e-08
NM_009557	Zfp46	1947.86	-1.08267	0.212325	-5.09912	3.41227e-07	2.48207e-06
NM_009566	Zfp92	1100.99	-1.53709	0.276484	-5.55943	2.70656e-08	2.39832e-07
NM_009581	Zp3r	42.0682	-3.47813	0.55165	-6.30496	2.88268e-10	3.50537e-09
NM_009593	Abcg1	623.901	-1.26289	0.22798	-5.53949	3.0335e-08	2.66009e-07
NM_009595	Abl2	152.254	-1.64499	0.364605	-4.51171	6.43057e-06	3.68696e-05
NM_009604	Chrng	71.2077	-3.90413	0.734399	-5.31609	1.06019e-07	8.45706e-07
NM_009615	Adam17	5925.62	-1.15266	0.22207	-5.19053	2.09696e-07	1.58767e-06
NM_009623	Adcy8	139.077	-1.89554	0.411626	-4.605	4.12474e-06	2.45192e-05
NM_009682	Ap3s2	1096.61	-0.984574	0.27472	-3.58391	0.000338485	0.00135394
NM_009705	Arg2	2026.98	-1.42764	0.196171	-7.27752	3.40006e-13	6.31298e-12
NM_009719	Neurog3	233.406	-1.32553	0.326343	-4.06176	4.8705e-05	0.000234537
NM_009728	Atp10a	218.7	-1.76694	0.308426	-5.7289	1.01085e-08	9.57749e-08
NM_009735	B2m	506.635	-1.92245	0.37974	-5.06254	4.13717e-07	2.96114e-06
NM_009748	Bet1	637.858	-1.55765	0.405644	-3.83994	0.000123062	0.000541601
NM_009757	Bmp15	43645	-3.66864	0.271844	-13.4954	1.66498e-41	6.02088e-39
NM_009764	Brca1	5597.99	-1.19847	0.212974	-5.62732	1.83032e-08	1.65768e-07
NM_009773	Bub1b	20617.8	-1.81041	0.259371	-6.98	2.95186e-12	4.82593e-11
NM_009788	Calb1	205.047	-1.94063	0.535765	-3.62217	0.000292145	0.00118893
NM_009791	Aspm	21986.5	-1.2402	0.268536	-4.61837	3.86768e-06	2.3136e-05
NM_009796	Capn7	1793.79	-1.35648	0.292828	-4.63236	3.61522e-06	2.17543e-05
NM_009807	Casp1	22.1921	-4.0465	0.876699	-4.61561	3.91942e-06	2.34086e-05
NM_009818	Ctnna1	2885.85	-1.18247	0.217375	-5.43978	5.33461e-08	4.46403e-07
NM_009834	Ccrn4l	6124.91	-1.66732	0.204706	-8.14496	3.79413e-16	1.01632e-14
NM_009847	Cd2ap	5888.14	-2.19897	0.227723	-9.65634	4.62073e-22	2.57068e-20
NM_009848	Entpd1	631.993	-2.01801	0.256985	-7.85263	4.074e-15	9.69843e-14
NM_009860	Cdc25c	211.586	-0.920102	0.304796	-3.01875	0.0025382	0.00803799
NM_009864	Cdh1	7480.8	-0.79783	0.228495	-3.49167	0.000480003	0.00185268
NM_009869	Cdh9	86.6253	-2.65517	0.707652	-3.75209	0.000175368	0.000746911
NM_009872	Cdk5r2	254.981	-2.24115	0.416887	-5.37591	7.61962e-08	6.242e-07
NM_009884	Cebpg	2847.98	-1.50792	0.221021	-6.82253	8.94489e-12	1.34777e-10
NM_009910	Cxcr3	59.9232	-3.65668	0.641479	-5.70039	1.19532e-08	1.11583e-07
NM_009914	Ccr3	51.8109	-2.41148	0.479793	-5.02609	5.00578e-07	3.55308e-06
NM_009922	Cnn1	135.57	-2.06408	0.338593	-6.09604	1.08725e-09	1.21958e-08
NM_009937	Colq	57.1942	-1.71994	0.431332	-3.98751	6.67707e-05	0.000310411
NM_009951	Igf2bp1	16.2229	-3.12715	0.893913	-3.49827	0.00046829	0.00181014
NM_009986	Cux1	523.438	-1.13322	0.273763	-4.13944	3.48162e-05	0.00017292
NM_010000	Cyp2b9	12.3004	-5.45137	1.14359	-4.76688	1.87098e-06	1.18847e-05
NM_010016	Cd55	7299.42	-1.04359	0.310572	-3.36023	0.000778788	0.00283991
NM_010028	Ddx3x	22905.1	-0.825262	0.251635	-3.27961	0.00103952	0.00366483
NM_010047	Dgcr6	152.737	-1.49684	0.382387	-3.91447	9.06032e-05	0.000409548
NM_010058	Dmwd	724.982	-1.07034	0.286511	-3.73577	0.000187139	0.000791496
NM_010088	Prl8a2	18.7857	-5.21717	1.02327	-5.09852	3.42316e-07	2.4876e-06
NM_010100	Edar	58.3076	-2.75038	0.68764	-3.99974	6.34119e-05	0.000296705
NM_010101	S1pr3	489.936	-2.53076	0.378878	-6.67961	2.39574e-11	3.38164e-10
NM_010111	Efnb2	2114.37	-1.31424	0.209377	-6.27693	3.45312e-10	4.14921e-09
NM_010113	Egf	294.227	-1.30228	0.386293	-3.37122	0.000748349	0.0027401
NM_010132	Emx2	688.408	-1.36919	0.285487	-4.79598	1.61879e-06	1.03695e-05
NM_010140	Epha3	247.047	-4.6322	0.370522	-12.5018	7.29582e-36	1.81654e-33
NM_010141	Epha7	395.461	-2.17515	0.401166	-5.42205	5.89189e-08	4.89262e-07
NM_010148	Epn2	104.407	-1.40289	0.331399	-4.23322	2.30366e-05	0.000118886
NM_010154	Erbb4	15.6155	-5.25881	1.00833	-5.21535	1.83467e-07	1.40166e-06
NM_010162	Ext1	2201.43	-2.11005	0.235253	-8.96929	2.9842e-19	1.1742e-17
NM_010167	Eya4	98.5653	-2.60765	0.594504	-4.38626	1.15318e-05	6.30242e-05
NM_010191	Fdft1	14086.7	-0.743332	0.223535	-3.32535	0.000883076	0.00316848
NM_010192	Fem1a	290.431	-1.59578	0.287365	-5.55314	2.80578e-08	2.47613e-07
NM_010193	Fem1b	5709.84	-1.23566	0.231855	-5.32944	9.85143e-08	7.89987e-07
NM_010207	Fgfr2	31.3475	-3.10745	0.667821	-4.65312	3.26954e-06	1.98552e-05
NM_010208	Fgr	107.382	-3.8547	0.429036	-8.98454	2.59809e-19	1.02493e-17
NM_010220	Fkbp5	2544.12	-3.29994	0.281532	-11.7214	9.90573e-32	1.50448e-29
NM_010228	Flt1	256.921	-1.48016	0.302913	-4.8864	1.02697e-06	6.82607e-06
NM_010262	Gbx2	2707.03	-1.22997	0.219095	-5.61387	1.97856e-08	1.7834e-07
NM_010267	Gdap1	6154.21	-2.62683	0.266929	-9.84095	7.49982e-23	4.80621e-21
NM_010279	Gfra1	282.455	-2.91989	0.459042	-6.36084	2.00652e-10	2.49591e-09
NM_010282	Ggps1	193.025	-1.36072	0.304528	-4.46827	7.88545e-06	4.44394e-05
NM_010283	Ggta1	15.8847	-3.21318	0.805596	-3.98858	6.64706e-05	0.0003093
NM_010289	Gja10	29.6237	-2.58474	0.801185	-3.22615	0.00125466	0.00431909
NM_010305	Gnai1	2085.78	-1.46077	0.280064	-5.21584	1.82989e-07	1.40012e-06
NM_010322	Gnpat	696.368	-1.16234	0.224176	-5.18493	2.16096e-07	1.63287e-06
NM_010324	Got1	879.373	-1.23643	0.295647	-4.18212	2.88805e-05	0.000145678
NM_010325	Got2	1075.76	-0.648197	0.212955	-3.04382	0.00233592	0.00747848
NM_010329	Pdpn	1031.61	-1.34784	0.229467	-5.87381	4.25886e-09	4.30363e-08
NM_010330	Emb	262.185	-1.78862	0.338388	-5.28569	1.25229e-07	9.80398e-07
NM_010353	Gsg2	1950.01	-3.01018	0.388413	-7.74994	9.19366e-15	2.10291e-13
NM_010395	H2-T10	415.907	-2.13322	0.377897	-5.64498	1.65202e-08	1.50787e-07
NM_010406	Hc	53.5634	-3.48632	0.723039	-4.82175	1.42303e-06	9.23633e-06
NM_010418	Herc2	7507.9	-0.695965	0.226168	-3.0772	0.00208956	0.0067924
NM_010437	Hivep2	579.835	-1.44508	0.335924	-4.30182	1.69404e-05	8.9742e-05
NM_010480	Hsp90aa1	31145.5	-0.88569	0.204404	-4.33304	1.47061e-05	7.88132e-05
NM_010487	Elavl3	1866.84	-1.61297	0.254791	-6.33057	2.44255e-10	2.98691e-09
NM_010560	Il6st	3339.12	-0.813227	0.231068	-3.51942	0.000432492	0.00168982
NM_010587	Itsn1	219.449	-1.71295	0.3866	-4.43081	9.38803e-06	5.23249e-05
NM_010595	Kcna1	71.5232	-4.12981	0.608796	-6.78357	1.17245e-11	1.74068e-10
NM_010623	Kif17	470.336	-1.60734	0.383927	-4.18657	2.832e-05	0.000143231
NM_010656	Sspn	1344.88	-1.88654	0.257743	-7.31943	2.49026e-13	4.72185e-12
NM_010661	Krt12	347.157	-4.21779	0.509719	-8.27475	1.2873e-16	3.64767e-15
NM_010691	Lbx1	11.5651	-4.53689	1.07199	-4.2322	2.31415e-05	0.000119305
NM_010696	Lcp2	64.8569	-2.55438	0.501435	-5.09414	3.5032e-07	2.5409e-06
NM_010703	Lef1	167.502	-1.39589	0.312554	-4.46608	7.9665e-06	4.48296e-05
NM_010710	Lhx2	270.077	-1.16479	0.3368	-3.45839	0.000543418	0.00206749
NM_010716	Lig3	1594.13	-2.72218	0.307907	-8.84091	9.49395e-19	3.50837e-17
NM_010748	Lyst	2409.15	-0.958092	0.250046	-3.83166	0.000127282	0.000558232
NM_010751	Mxd1	4468.77	-1.8985	0.268671	-7.06626	1.59165e-12	2.71313e-11
NM_010761	Ccndbp1	6309.07	-0.767439	0.224112	-3.42435	0.00061627	0.00230653
NM_010771	Matr3	3851.1	-0.772588	0.218586	-3.53448	0.000408578	0.0016068
NM_010776	Mbl2	2085.2	-1.22834	0.268113	-4.58143	4.61801e-06	2.7217e-05
NM_010820	Mpdz	2393.08	-1.18465	0.236956	-4.99945	5.74931e-07	4.01658e-06
NM_010828	Cited2	3069.72	-1.86782	0.377339	-4.94998	7.42208e-07	5.07092e-06
NM_010830	Msh6	3549.59	-0.777791	0.256671	-3.03031	0.00244306	0.00778702
NM_010839	Mtcp1	208.44	-0.9312	0.267373	-3.48278	0.000496245	0.00190906
NM_010865	Myoc	79.3085	-3.77684	0.524041	-7.20714	5.71377e-13	1.01975e-11
NM_010880	Ncl	18399	-0.92019	0.227838	-4.03879	5.37271e-05	0.000256445
NM_010881	Ncoa1	1611.52	-0.893837	0.215874	-4.14055	3.4648e-05	0.000172141
NM_010946	Ntan1	243.719	-1.01862	0.3126	-3.25855	0.00111985	0.00390277
NM_011030	P4ha1	782.493	-1.46847	0.281136	-5.22333	1.75733e-07	1.34799e-06
NM_011037	Pax2	305.154	-3.69786	0.401848	-9.20212	3.50947e-20	1.55399e-18
NM_011055	Pde3b	1149.21	-1.81977	0.367254	-4.95508	7.2302e-07	4.9599e-06
NM_011075	Abcb1b	1636.42	-1.44467	0.293516	-4.92195	8.56869e-07	5.77379e-06
NM_011081	Piga	789.416	-1.62063	0.345147	-4.69547	2.65991e-06	1.64758e-05
NM_011112	Papola	7567.4	-1.22678	0.312467	-3.92612	8.63263e-05	0.0003922
NM_011121	Plk1	3015.72	-0.7702	0.223337	-3.4486	0.000563508	0.00213204
NM_011133	Pole2	285.718	-1.21152	0.383883	-3.15597	0.00159968	0.00535741
NM_011147	Ppef1	159.309	-2.1145	0.521007	-4.05848	4.93934e-05	0.000237326
NM_011156	Prep	2515.12	-1.42707	0.277987	-5.13358	2.84277e-07	2.1e-06
NM_011157	Srgn	829.566	-1.74936	0.265242	-6.59534	4.24288e-11	5.81596e-10
NM_011158	Prkar2b	647.56	-0.957462	0.301734	-3.1732	0.00150769	0.00508749
NM_011169	Prlr	1227.78	-2.70024	0.53606	-5.0372	4.72393e-07	3.3621e-06
NM_011188	Psmc2	1215.77	-0.725707	0.241341	-3.00698	0.0026386	0.00831432
NM_011204	Ptpn13	621.332	-0.94556	0.273497	-3.4573	0.000545626	0.0020733
NM_011212	Ptpre	1431.3	-2.44924	0.315388	-7.7658	8.11288e-15	1.8812e-13
NM_011263	Rest	5975.12	-1.3506	0.225746	-5.98282	2.19305e-09	2.34399e-08
NM_011270	Rhd	274.712	-1.61474	0.415414	-3.88708	0.000101459	0.000453892
NM_011273	Xpr1	3392.18	-1.96435	0.290561	-6.76055	1.37468e-11	2.02313e-10
NM_011275	Rnaseh1	293.249	-1.1127	0.298434	-3.72847	0.000192649	0.000812313
NM_011276	Rlim	8010.4	-1.55545	0.301438	-5.16008	2.46848e-07	1.83871e-06
NM_011286	Rph3a	3128.61	-2.62594	0.364618	-7.2019	5.93783e-13	1.05849e-11
NM_011304	Ruvbl2	2173.25	-0.863648	0.276886	-3.11914	0.0018138	0.00599781
NM_011333	Ccl2	21.5597	-4.53035	0.95677	-4.73505	2.19004e-06	1.37675e-05
NM_011347	Selp	623.3	-4.1599	0.430773	-9.65682	4.5993e-22	2.56817e-20
NM_011348	Sema3e	45.131	-4.21438	0.625107	-6.74185	1.56381e-11	2.2772e-10
NM_011369	Shcbp1	565.752	-1.73143	0.260383	-6.64954	2.94009e-11	4.10424e-10
NM_011372	St6galnac3	365.905	-1.3063	0.425953	-3.06677	0.00216383	0.00699983
NM_011391	Slc16a7	18.6697	-5.29601	0.999843	-5.29684	1.17822e-07	9.29945e-07
NM_011392	Slc34a1	7.5899	-3.65942	1.10397	-3.31478	0.000917168	0.00327686
NM_011395	Slc22a3	109.462	-1.89271	0.616423	-3.07048	0.00213718	0.00692246
NM_011399	Slc25a17	1346.59	-1.47639	0.257397	-5.73585	9.7024e-09	9.23309e-08
NM_011443	Sox2	13.1489	-4.45422	1.03145	-4.3184	1.57168e-05	8.37272e-05
NM_011447	Sox8	1214.62	-1.07358	0.255169	-4.20734	2.5839e-05	0.000131825
NM_011459	Serpinb8	97.224	-3.32063	0.4732	-7.01739	2.26051e-12	3.74401e-11
NM_011462	Spin1	142681	-1.35642	0.356591	-3.80384	0.00014247	0.000618854
NM_011482	Nhp2l1	1023.98	-0.851241	0.254994	-3.33827	0.000843009	0.00304413
NM_011495	Plk4	366.455	-2.35784	0.363607	-6.48459	8.89738e-11	1.15796e-09
NM_011500	Strn	16399.7	-2.26634	0.270504	-8.37819	5.37485e-17	1.6038e-15
NM_011514	Suv39h1	1384.11	-1.63545	0.269411	-6.07047	1.27535e-09	1.41697e-08
NM_011519	Sdc1	1943.55	-1.08822	0.303996	-3.57974	0.000343939	0.00137395
NM_011542	Tcea3	918.494	-1.84959	0.28278	-6.54076	6.12056e-11	8.20468e-10
NM_011543	Skp1a	19678.1	-1.2111	0.29126	-4.15815	3.20834e-05	0.00016029
NM_011586	Myo18a	1275.51	-1.1243	0.38195	-2.94357	0.00324454	0.00998947
NM_011623	Top2a	2483.47	-1.07888	0.23602	-4.57113	4.85094e-06	2.84244e-05
NM_011624	Top3b	612.438	-1.33241	0.232886	-5.72127	1.0573e-08	9.99268e-08
NM_011657	Tulp3	2397.44	-1.01802	0.334256	-3.04565	0.00232181	0.00743647
NM_011660	Txn1	340.9	-0.90371	0.273954	-3.29876	0.000971131	0.00345395
NM_011682	Utrn	799.974	-2.29	0.496474	-4.61252	3.9781e-06	2.36939e-05
NM_011706	Trpv2	13.1531	-2.94486	0.938464	-3.13796	0.00170127	0.00566022
NM_011711	Fmnl3	12923.3	-0.918596	0.231935	-3.96058	7.47675e-05	0.000343695
NM_011729	Ercc5	778.014	-0.897173	0.232997	-3.85058	0.000117841	0.000520281
NM_011731	Slc6a20b	200.632	-1.59139	0.452277	-3.51861	0.00043382	0.00169379
NM_011764	Zfp90	308.128	-2.49565	0.406565	-6.13838	8.33654e-10	9.47011e-09
NM_011765	Zfp97	314.153	-1.71585	0.392694	-4.36944	1.24563e-05	6.75664e-05
NM_011767	Zfr	5822.92	-1.41727	0.339927	-4.16932	3.05506e-05	0.000153288
NM_011769	Zim1	51.927	-3.78013	0.582311	-6.49159	8.49324e-11	1.10916e-09
NM_011772	Ikzf4	1172.91	-3.85479	0.261951	-14.7157	5.11256e-49	3.37607e-46
NM_011773	Slc30a3	3745.75	-0.881599	0.296468	-2.97367	0.00294263	0.00917336
NM_011787	Amfr	5322.62	-1.14301	0.225488	-5.06904	3.99831e-07	2.86986e-06
NM_011805	Dido1	64.5962	-1.79616	0.590303	-3.04277	0.00234412	0.00750157
NM_011809	Ets2	1024.61	-1.46319	0.209638	-6.97957	2.96083e-12	4.83538e-11
NM_011818	Gmcl1	1147.88	-1.20368	0.335642	-3.58621	0.000335517	0.00134348
NM_011822	Pigq	1540.58	-0.635744	0.215507	-2.95	0.00317777	0.00980776
NM_011824	Grem1	15.9426	-5.55723	1.15326	-4.8187	1.44494e-06	9.35855e-06
NM_011828	Hs2st1	6046.91	-1.88894	0.344967	-5.47572	4.3574e-08	3.69722e-07
NM_011856	Tenm2	52.3393	-4.66892	0.719015	-6.4935	8.38669e-11	1.09619e-09
NM_011861	Pacsin1	140.639	-1.6887	0.369011	-4.57627	4.73333e-06	2.78427e-05
NM_011876	Twf2	233.016	-1.23045	0.35525	-3.46361	0.000532982	0.0020339
NM_011898	Spry4	14196.5	-3.06713	0.250024	-12.2673	1.35658e-34	2.82242e-32
NM_011906	Tpra1	462.027	-1.50868	0.362514	-4.16172	3.15865e-05	0.000158068
NM_011908	Ubl3	1207.17	-0.978064	0.294835	-3.31733	0.000908825	0.00324935
NM_011931	Rfwd2	3983.56	-1.36222	0.201882	-6.7476	1.50308e-11	2.19508e-10
NM_011932	Dapp1	278.018	-3.45921	0.337044	-10.2634	1.03013e-24	7.90179e-23
NM_011941	Mapkbp1	2021.24	-0.675788	0.211099	-3.20128	0.00136819	0.00466969
NM_011959	Orc5	2838.56	-1.16652	0.255629	-4.56332	5.03503e-06	2.94123e-05
NM_011973	Mok	831.989	-1.42753	0.241607	-5.90847	3.45308e-09	3.55321e-08
NM_011990	Slc7a11	13301.6	-1.11727	0.333177	-3.35339	0.000798288	0.00289988
NM_011992	Rcn2	1557.75	-1.62604	0.216261	-7.51888	5.52463e-14	1.1278e-12
NM_012002	Cops6	847.931	-0.814293	0.245095	-3.32235	0.000892621	0.00319894
NM_012042	Cul1	20670.8	-1.35741	0.233843	-5.8048	6.44422e-09	6.30231e-08
NM_013479	Bcl2l10	9357.23	-3.92377	0.329162	-11.9205	9.25475e-33	1.54909e-30
NM_013482	Btk	316.965	-1.3045	0.311568	-4.18689	2.82798e-05	0.000143076
NM_013499	Cr1l	406.369	-1.1679	0.269915	-4.32694	1.51198e-05	8.07454e-05
NM_013505	Dsc2	301.574	-2.02938	0.266644	-7.61081	2.72377e-14	5.83479e-13
NM_013515	Stom	3879.85	-1.48986	0.199018	-7.48607	7.09682e-14	1.43715e-12
NM_013531	Gnb4	2004.9	-0.824263	0.212359	-3.88147	0.000103829	0.000463536
NM_013536	Emg1	449.858	-1.28353	0.321069	-3.99766	6.39712e-05	0.00029886
NM_013589	Ltbp2	172.563	-1.05004	0.30427	-3.451	0.000558518	0.00211541
NM_013607	Myh11	42.3665	-6.59941	0.899459	-7.33709	2.18286e-13	4.17023e-12
NM_013632	Pnp	572.081	-1.53792	0.30694	-5.01048	5.42933e-07	3.81939e-06
NM_013642	Dusp1	1987.29	-1.549	0.378686	-4.09047	4.30507e-05	0.000209821
NM_013646	Rora	164.774	-1.11859	0.335848	-3.33063	0.000866482	0.00311704
NM_013660	Sema4d	1448.88	-1.12136	0.345334	-3.24717	0.0011656	0.00404459
NM_013690	Tek	513.799	-1.09035	0.238346	-4.57466	4.77002e-06	2.80368e-05
NM_013708	Nr2e3	39.6885	-1.66816	0.514896	-3.2398	0.00119613	0.00413635
NM_013717	B9d1	136.194	-1.03415	0.344294	-3.00367	0.00266742	0.00839296
NM_013730	Slamf1	133.57	-5.224	0.509916	-10.2448	1.24863e-24	9.48206e-23
NM_013733	Chaf1a	4672.65	-1.43725	0.351037	-4.09429	4.23467e-05	0.000206804
NM_013767	Csnk1e	7017.86	-0.741116	0.229562	-3.22839	0.0012449	0.00428938
NM_013772	Tcl1b3	1074.43	-1.72501	0.248617	-6.93841	3.96527e-12	6.31284e-11
NM_013773	Tcl1b1	2927.46	-2.76103	0.286854	-9.62521	6.2582e-22	3.44382e-20
NM_013774	Tcl1b4	1336.44	-1.96777	0.302402	-6.50712	7.66065e-11	1.01086e-09
NM_013775	Tcl1b2	1879.97	-2.27382	0.229515	-9.90708	3.87799e-23	2.54974e-21
NM_013776	Tcl1b5	376.674	-4.43547	0.299575	-14.8059	1.34267e-49	9.7107e-47
NM_013791	Mkln1	2447.14	-0.906614	0.30688	-2.9543	0.00313384	0.00969187
NM_013813	Epb4.1l3	530.126	-0.993555	0.265121	-3.74755	0.00017857	0.000759279
NM_013815	Baz1a	3109.62	-0.924966	0.214804	-4.30609	1.66165e-05	8.80879e-05
NM_013831	Pstpip2	966.36	-1.12421	0.315233	-3.56628	0.00036208	0.00143772
NM_013844	Zfp68	69.9117	-1.86983	0.467047	-4.00353	6.24048e-05	0.000292532
NM_013852	Abcf3	3687.02	-2.03737	0.309683	-6.57888	4.73996e-11	6.45076e-10
NM_013860	Limd1	1173.94	-1.08476	0.237133	-4.57447	4.7743e-06	2.80511e-05
NM_013866	Zfp385a	549.291	-1.36324	0.245633	-5.54992	2.85797e-08	2.51634e-07
NM_013875	Pde7b	171.67	-2.36017	0.63315	-3.72767	0.000193258	0.000814203
NM_013907	Fbxw4	370.837	-2.3311	0.28296	-8.23828	1.74707e-16	4.87767e-15
NM_013914	Snai3	95.6604	-1.9856	0.580839	-3.4185	0.000629666	0.00235203
NM_013917	Pttg1	971.479	-1.76177	0.31333	-5.62274	1.87949e-08	1.69814e-07
NM_013919	Usp21	697.15	-1.19986	0.226112	-5.30647	1.11771e-07	8.86226e-07
NM_013923	Rnf19a	922.237	-0.818663	0.24888	-3.28938	0.00100407	0.00355556
NM_013930	Aass	3436.62	-1.1848	0.246627	-4.80403	1.55503e-06	1.00033e-05
NM_015728	Slc33a1	30.6314	-2.30353	0.736487	-3.12773	0.00176162	0.00583671
NM_015744	Enpp2	106.052	-2.50337	0.449697	-5.56679	2.59479e-08	2.30736e-07
NM_015767	Ttpa	12.9999	-3.51034	0.994742	-3.52889	0.0004173	0.00163729
NM_015773	Spag6	20.0834	-2.98696	0.697751	-4.28084	1.86188e-05	9.77131e-05
NM_015792	Fbxo18	1818.29	-0.94382	0.228555	-4.12951	3.63534e-05	0.00017979
NM_015793	Fbxw14	3789.27	-1.51781	0.276456	-5.49024	4.01394e-08	3.43651e-07
NM_015794	Fbxl17	453.428	-0.907158	0.29934	-3.03052	0.0024413	0.00778435
NM_015817	Ppap2c	119.794	-1.18703	0.385952	-3.0756	0.00210081	0.00681774
NM_016677	Hpcal1	359.183	-1.60016	0.275604	-5.80601	6.39798e-09	6.26516e-08
NM_016688	Pdcd7	3136.85	-1.02339	0.273464	-3.74233	0.000182324	0.000774149
NM_016693	Map3k6	2392.13	-2.00147	0.318012	-6.2937	3.09994e-10	3.75155e-09
NM_016703	Preb	390.991	-2.10693	0.323432	-6.51431	7.30255e-11	9.66967e-10
NM_016748	Ctps	2774.09	-0.671448	0.224267	-2.99396	0.00275379	0.00863609
NM_016771	Sult1d1	10.1934	-3.40341	1.08674	-3.13177	0.00173757	0.00576836
NM_016782	Cntnap1	1239.68	-3.10691	0.241833	-12.8473	8.90645e-38	2.55228e-35
NM_016784	Plrg1	1372.72	-0.768788	0.252717	-3.04209	0.0023494	0.0075169
NM_016786	Ube2k	15914.5	-1.20141	0.223231	-5.38192	7.36964e-08	6.05355e-07
NM_016806	Hnrnpa2b1	1995.72	-0.836242	0.204111	-4.09699	4.18553e-05	0.000204866
NM_016867	Gipc2	167.979	-2.349	0.367102	-6.39877	1.56637e-10	1.97101e-09
NM_016882	Sart1	1002.03	-1.05352	0.267651	-3.93619	8.27854e-05	0.000377468
NM_016889	Insm1	314.922	-1.71183	0.32118	-5.32981	9.83167e-08	7.88819e-07
NM_016895	Ak2	2166.47	-1.00179	0.333011	-3.00828	0.00262729	0.00828555
NM_016902	Nphp1	558.563	-1.52891	0.258633	-5.91149	3.39024e-09	3.50279e-08
NM_016904	Cks1b	1049.21	-1.26841	0.286591	-4.42585	9.60651e-06	5.34642e-05
NM_016918	Nudt5	968.75	-0.85481	0.21752	-3.92981	8.50142e-05	0.000386586
NM_016924	Rwdd2b	307.202	-0.945278	0.30529	-3.09633	0.00195934	0.00640656
NM_016926	Sart3	5462.36	-1.3238	0.259103	-5.10917	3.23577e-07	2.3616e-06
NM_016928	Tlr5	62.682	-3.87434	0.636884	-6.08327	1.17755e-09	1.31408e-08
NM_016981	Slc9a1	3810.54	-0.665607	0.209126	-3.1828	0.00145859	0.00494266
NM_016984	Trpc4	27.6622	-2.03066	0.59115	-3.4351	0.000592337	0.00222683
NM_017383	Cntn6	234.95	-3.8666	1.02922	-3.75684	0.000172074	0.000733501
NM_017395	Rfx5	1989.55	-1.18217	0.207299	-5.70275	1.17893e-08	1.10256e-07
NM_017401	Polm	848.883	-2.87123	0.373282	-7.69187	1.45005e-14	3.2151e-13
NM_017407	Spag5	764.094	-0.887301	0.215727	-4.11308	3.90421e-05	0.000192211
NM_017474	Clca1	9.72198	-4.3606	1.07369	-4.06132	4.87957e-05	0.000234825
NM_017475	Rragc	5632.39	-1.62948	0.259795	-6.27218	3.5603e-10	4.27124e-09
NM_018729	Cd244	16.7764	-2.60631	0.874645	-2.97985	0.00288386	0.00901422
NM_018744	Sema6a	365.067	-1.70021	0.411339	-4.13335	3.57519e-05	0.000177104
NM_018753	Ywhab	6629.11	-1.20182	0.213641	-5.62545	1.85027e-08	1.67274e-07
NM_018757	Nme6	53.6916	-2.0799	0.626268	-3.3211	0.00089663	0.00321104
NM_018761	Ctnnal1	796.725	-1.43269	0.279647	-5.12322	3.00357e-07	2.20698e-06
NM_018773	Skap2	1443.61	-0.790236	0.217705	-3.62985	0.000283588	0.00115939
NM_018775	Tbc1d8	3404.48	-1.84696	0.247497	-7.46254	8.48705e-14	1.70279e-12
NM_018779	Pde3a	5434.18	-1.10011	0.222417	-4.94613	7.57015e-07	5.16512e-06
NM_018785	Prpf40a	2562.38	-1.2112	0.243697	-4.9701	6.6918e-07	4.61768e-06
NM_018791	Zfp108	2462.41	-3.25046	0.31563	-10.2983	7.17004e-25	5.58455e-23
NM_018798	Ubqln2	1392.23	-1.39458	0.345458	-4.03692	5.4158e-05	0.000258266
NM_018804	Syt11	422.039	-3.19492	0.327418	-9.75792	1.70622e-22	1.04915e-20
NM_018814	Pcnx	5287.34	-0.887534	0.190557	-4.65759	3.19935e-06	1.94912e-05
NM_018821	Socs6	1167.03	-1.15583	0.291095	-3.97065	7.16776e-05	0.000331032
NM_018824	Slc23a2	13124.3	-1.55286	0.232716	-6.67277	2.51019e-11	3.5268e-10
NM_018828	Fnbp4	2518.26	-1.06911	0.244602	-4.37082	1.23778e-05	6.7189e-05
NM_018829	Ap3m1	1825.01	-1.08517	0.344715	-3.14803	0.00164376	0.00549053
NM_018830	Asah2	328.43	-1.06134	0.334533	-3.17261	0.00151074	0.00509325
NM_018831	Dclre1a	2210.15	-1.1394	0.239452	-4.75837	1.95167e-06	1.23611e-05
NM_018866	Cxcl13	37.8268	-3.426	0.638542	-5.36535	8.07929e-08	6.5866e-07
NM_018867	Cpxm2	153.174	-1.95573	0.439708	-4.4478	8.67531e-06	4.85326e-05
NM_018889	Pigb	218.372	-2.04813	0.305268	-6.70929	1.95574e-11	2.80489e-10
NM_019397	Egfl6	488.139	-3.19664	0.340708	-9.38233	6.45295e-21	3.13123e-19
NM_019419	Arl6ip1	5778.12	-0.877261	0.260325	-3.36987	0.000752042	0.00275163
NM_019421	Cd320	414.228	-0.785618	0.238561	-3.29315	0.000990734	0.00351572
NM_019426	Atf7ip	6536.09	-1.19366	0.289783	-4.11915	3.80268e-05	0.000187456
NM_019431	Cacng4	21.9362	-2.22896	0.693005	-3.21636	0.00129826	0.0044549
NM_019438	Ncapg	6283.81	-1.44641	0.215828	-6.70164	2.06088e-11	2.93903e-10
NM_019445	Fmn2	8991.66	-2.30354	0.339753	-6.78002	1.20156e-11	1.77868e-10
NM_019460	Sfmbt1	47.5376	-2.59052	0.505912	-5.12049	3.04748e-07	2.23816e-06
NM_019461	Usp27x	1218.3	-1.71388	0.270702	-6.33122	2.4323e-10	2.97918e-09
NM_019480	Ebag9	881.674	-2.17173	0.386883	-5.61341	1.98379e-08	1.78619e-07
NM_019481	Slc13a1	6.83321	-3.54552	1.17706	-3.0122	0.00259366	0.00819993
NM_019489	Ppie	51.3329	-1.69158	0.519068	-3.25887	0.00111856	0.00389918
NM_019493	Btg4	11130	-2.38446	0.261764	-9.1092	8.29954e-20	3.49178e-18
NM_019499	Mad2l1	3402.66	-1.05333	0.340564	-3.09291	0.00198207	0.00647668
NM_019502	Timm10b	180.072	-1.14571	0.336746	-3.4023	0.000668213	0.00247275
NM_019511	Ramp3	57.14	-2.91718	0.591935	-4.92821	8.29874e-07	5.61681e-06
NM_019515	Nmu	41.0319	-3.33991	0.637577	-5.23845	1.61931e-07	1.24779e-06
NM_019517	Bace2	173.548	-1.98952	0.360408	-5.52019	3.3864e-08	2.93901e-07
NM_019535	Sh3gl2	191.604	-1.32474	0.39464	-3.35684	0.000788382	0.00286801
NM_019536	Dnah10	1978.67	-0.780242	0.255583	-3.0528	0.0022672	0.0072846
NM_019549	Plek	350.366	-2.61006	0.344397	-7.57862	3.49248e-14	7.3063e-13
NM_019583	Il17rb	447.629	-1.92814	0.394068	-4.89292	9.9351e-07	6.62108e-06
NM_019588	Plce1	2549.36	-2.85237	0.26307	-10.8426	2.16158e-27	2.27986e-25
NM_019636	Tbc1d1	3586.74	-2.27471	0.209613	-10.852	1.95172e-27	2.10232e-25
NM_019648	Metap2	4416	-0.710911	0.239752	-2.9652	0.00302488	0.00939508
NM_019663	Pias1	6877.24	-1.4709	0.296854	-4.95498	7.23396e-07	4.96024e-06
NM_019670	Diap3	1615.68	-1.07063	0.27688	-3.86677	0.000110286	0.000489057
NM_019683	Ankrd49	1151.38	-2.70722	0.323604	-8.36585	5.96849e-17	1.76361e-15
NM_019715	Kcmf1	18277.9	-0.707039	0.213891	-3.30561	0.00094771	0.00337883
NM_019720	Cyb561d2	151.185	-1.71105	0.40748	-4.19911	2.6797e-05	0.000136254
NM_019736	Acot9	230.772	-0.961655	0.292048	-3.29279	0.000991971	0.00351889
NM_019737	B4galt6	3480.52	-0.909071	0.30684	-2.96269	0.00304965	0.00946232
NM_019739	Foxo1	16561.4	-1.00163	0.316339	-3.16632	0.0015438	0.00518973
NM_019752	Htra2	115.178	-1.68636	0.488359	-3.45311	0.000554171	0.00210051
NM_019753	Cdh17	98.2266	-4.80625	0.633791	-7.58333	3.36796e-14	7.08485e-13
NM_019790	Tmeff2	34.2991	-3.39628	0.962658	-3.52802	0.000418682	0.00164144
NM_019804	B4galt4	3267.03	-2.22794	0.304676	-7.31248	2.62253e-13	4.95411e-12
NM_019824	Arpc3	357.344	-1.2749	0.313866	-4.06191	4.86724e-05	0.000234455
NM_019825	Ncoa6	2916.35	-1.26463	0.344221	-3.67388	0.000238898	0.000989738
NM_019829	Stx5a	802.451	-1.1632	0.375025	-3.10165	0.00192447	0.00631291
NM_019872	Dmrtb1	287.705	-3.38829	0.538846	-6.28806	3.21465e-10	3.88109e-09
NM_019873	Fkbpl	135.892	-2.39528	0.409672	-5.84681	5.01087e-09	4.9905e-08
NM_019911	Tdo2	24.9981	-3.96223	0.753139	-5.26095	1.43315e-07	1.11225e-06
NM_019912	Ube2d2a	3639.91	-1.03543	0.221768	-4.66901	3.02661e-06	1.85655e-05
NM_019914	Mllt11	460.575	-1.5141	0.375063	-4.03691	5.41598e-05	0.000258266
NM_019920	Lamtor3	1184.59	-1.04214	0.257305	-4.0502	5.11741e-05	0.000245107
NM_019953	Cnpy2	185.595	-1.01994	0.328565	-3.10421	0.00190787	0.00626526
NM_019969	Plag1	1715.97	-1.35386	0.333531	-4.05918	4.9246e-05	0.000236693
NM_019977	Miox	1684.74	-2.27853	0.230918	-9.86728	5.77063e-23	3.76156e-21
NM_019980	Litaf	412.049	-1.76863	0.367101	-4.81785	1.45116e-06	9.3908e-06
NM_020021	Mos	2569.2	-1.19734	0.343631	-3.48439	0.000493269	0.00189905
NM_020035	Pigo	139.133	-1.5675	0.526972	-2.97454	0.0029343	0.00915305
NM_020046	Dhodh	199.428	-1.07644	0.348553	-3.08831	0.002013	0.0065721
NM_020256	Zbtb33	27.5662	-2.2948	0.62577	-3.66716	0.000245259	0.0010136
NM_020279	Ccl28	95.069	-1.55354	0.50913	-3.05135	0.00227813	0.00731549
NM_020295	Lmbr1	1530.01	-1.54859	0.292873	-5.28757	1.2395e-07	9.71386e-07
NM_020488	Gabrq	51.9266	-2.20761	0.465914	-4.73823	2.15597e-06	1.35702e-05
NM_020497	Zfp276	375.575	-0.865313	0.251878	-3.43544	0.000591589	0.00222512
NM_020506	Xpo4	1076.91	-1.41635	0.24921	-5.68336	1.32071e-08	1.22534e-07
NM_020507	Tob2	5692.52	-0.803773	0.209453	-3.83748	0.000124304	0.000546433
NM_020560	Mrps31	1059.92	-1.03119	0.250905	-4.10987	3.95882e-05	0.000194584
NM_020575	March7	3363.06	-1.77687	0.2589	-6.86317	6.73482e-12	1.03531e-10
NM_020614	Taf1b	772.161	-1.48534	0.24223	-6.13193	8.68182e-10	9.82664e-09
NM_020626	Tmem27	29.1024	-3.99039	0.771277	-5.17374	2.2945e-07	1.72178e-06
NM_021022	Abcb11	28.8786	-3.88821	0.767513	-5.06599	4.06284e-07	2.91206e-06
NM_021028	Tk2	263.629	-2.32618	0.278269	-8.35946	6.30081e-17	1.85689e-15
NM_021050	Cftr	265.964	-1.91759	0.350713	-5.46769	4.55946e-08	3.85145e-07
NM_021272	Fabp7	55.5458	-1.73771	0.481027	-3.61251	0.000303249	0.00122951
NM_021288	Tyms	1155.09	-1.12442	0.228235	-4.92657	8.36835e-07	5.65722e-06
NM_021301	Slc15a2	150.383	-3.66008	0.385626	-9.49126	2.2825e-21	1.17514e-19
NM_021311	Piwil1	548.495	-5.38685	0.359242	-14.995	7.9109e-51	6.32372e-48
NM_021323	Usp29	1270.7	-3.55103	0.297433	-11.9389	7.41849e-33	1.26598e-30
NM_021328	Bin3	333.596	-1.14957	0.309861	-3.70993	0.000207313	0.000867641
NM_021344	Tesc	493.382	-1.54069	0.296772	-5.19148	2.08627e-07	1.58115e-06
NM_021350	Chml	223.354	-2.97782	0.355321	-8.38067	5.26289e-17	1.57658e-15
NM_021375	Rhbg	28.6082	-2.98447	0.680289	-4.38706	1.14892e-05	6.28371e-05
NM_021389	Sh3kbp1	59.571	-2.61698	0.482622	-5.42243	5.87929e-08	4.8875e-07
NM_021397	Zbtb32	27.9014	-1.81269	0.574944	-3.15281	0.00161705	0.00540725
NM_021408	Ush2a	342.639	-1.10115	0.244122	-4.51067	6.46225e-06	3.70233e-05
NM_021434	Gpr180	1091.46	-0.710018	0.221955	-3.19893	0.0013794	0.0047016
NM_021435	Slc35b4	2352.74	-0.989294	0.261	-3.7904	0.000150407	0.000649078
NM_021448	Elp2	3991.82	-0.738344	0.214067	-3.44913	0.000562404	0.00212853
NM_021453	Pga5	386.742	-1.25649	0.275627	-4.55866	5.14818e-06	2.9981e-05
NM_021461	Mknk1	1854.66	-1.04378	0.209908	-4.97254	6.60808e-07	4.56197e-06
NM_021495	Pvrl3	1785.55	-1.9356	0.269561	-7.18058	6.94163e-13	1.2245e-11
NM_021496	Pvrl3	111.554	-1.18568	0.387125	-3.06278	0.00219294	0.00708494
NM_021506	Sh3rf1	2062.28	-0.939765	0.195813	-4.79929	1.59226e-06	1.02211e-05
NM_021513	Thap11	885.412	-1.57146	0.307866	-5.10437	3.31902e-07	2.41771e-06
NM_021535	Smu1	3819.17	-1.49817	0.283887	-5.27736	1.31056e-07	1.02444e-06
NM_021554	Mettl9	598.554	-1.18024	0.300034	-3.93369	8.365e-05	0.000381067
NM_021557	Rdh11	1225.76	-2.09092	0.295035	-7.08703	1.37022e-12	2.3622e-11
NM_021565	Midn	3243.36	-0.912242	0.255302	-3.57319	0.000352655	0.00140433
NM_021600	Chrnd	628.509	-3.83015	0.281329	-13.6145	3.28435e-42	1.27904e-39
NM_021715	Chst7	147.455	-1.03513	0.348641	-2.96905	0.00298722	0.0092952
NM_021719	Cldn15	174.8	-3.36862	0.696723	-4.83494	1.33184e-06	8.68902e-06
NM_021720	Donson	523.474	-0.95371	0.299437	-3.18501	0.00144749	0.00490836
NM_021788	Sap30	1473.06	-1.62347	0.290043	-5.59734	2.17667e-08	1.95271e-07
NM_021790	Cenpk	77.8026	-2.03085	0.445027	-4.56343	5.03252e-06	2.94099e-05
NM_021793	Tmem8	1017.77	-1.38769	0.293414	-4.72947	2.2511e-06	1.40989e-05
NM_021876	Eed	1825.09	-1.3992	0.216754	-6.45526	1.08031e-10	1.38931e-09
NM_021879	Oca2	57.9162	-3.5593	0.662101	-5.37576	7.62586e-08	6.24375e-07
NM_021885	Tub	1033.02	-3.80201	0.226231	-16.8059	2.20984e-63	4.19537e-60
NM_021886	Cenph	1181.96	-0.756997	0.21893	-3.45771	0.000544786	0.00207062
NM_022019	Dusp10	618.709	-1.71583	0.239122	-7.17556	7.20127e-13	1.26883e-11
NM_022311	Tcte2	951.696	-1.58515	0.247713	-6.39914	1.56254e-10	1.96781e-09
NM_022409	Zfp296	2597.57	-1.58478	0.287838	-5.50582	3.67462e-08	3.16563e-07
NM_022416	Stk32b	1500.02	-1.60353	0.36625	-4.37825	1.19635e-05	6.51262e-05
NM_022655	Ireb2	5503.69	-1.76779	0.352608	-5.01347	5.34567e-07	3.76927e-06
NM_022811	Polr1e	304.766	-1.2803	0.325506	-3.93327	8.37997e-05	0.000381634
NM_022885	Slc30a5	540.497	-1.47755	0.270382	-5.46469	4.63724e-08	3.91498e-07
NM_022886	Scel	280.861	-2.60794	0.469883	-5.55018	2.85369e-08	2.51403e-07
NM_022888	Izumo1r	983.393	-2.77745	0.3828	-7.25563	3.99808e-13	7.36035e-12
NM_022889	Pes1	993.645	-1.13542	0.207106	-5.4823	4.19827e-08	3.58019e-07
NM_022979	Nup98	7080.02	-1.2019	0.198905	-6.04256	1.51687e-09	1.66581e-08
NM_022994	Dap3	181.247	-1.18795	0.312476	-3.80173	0.000143686	0.000623695
NM_023118	Dab2	1277.83	-4.4878	0.469911	-9.55032	1.29295e-21	6.84227e-20
NM_023126	Rab8a	763.476	-0.993392	0.314897	-3.15465	0.0016069	0.00537797
NM_023131	Rce1	123.177	-2.10403	0.371382	-5.66541	1.46671e-08	1.34927e-07
NM_023215	Chtop	972.487	-1.0593	0.284852	-3.71879	0.000200183	0.000840811
NM_023239	Ndnl2	356.164	-1.66016	0.263013	-6.31209	2.75291e-10	3.35564e-09
NM_023248	Sbds	2151.4	-1.01021	0.241714	-4.17936	2.92332e-05	0.000147164
NM_023249	Ypel1	63.6392	-2.15644	0.471936	-4.56935	4.89241e-06	2.86453e-05
NM_023256	Krt20	4.6009	-4.01971	1.24676	-3.22412	0.00126359	0.00434784
NM_023290	Mkrn2	1555.47	-0.730853	0.215502	-3.3914	0.000695361	0.00256276
NM_023292	Pus3	249.048	-1.90587	0.282631	-6.74331	1.54817e-11	2.25875e-10
NM_023311	Yipf5	1728.73	-1.47266	0.2384	-6.17727	6.52192e-10	7.5327e-09
NM_023320	Plekho1	175.623	-1.43593	0.462512	-3.10464	0.00190513	0.00625758
NM_023322	Zkscan14	706.969	-0.802764	0.26193	-3.0648	0.00217813	0.00704311
NM_023324	Peli1	2537.97	-1.06228	0.313165	-3.39207	0.000693678	0.00255718
NM_023383	Aadac	481.536	-4.46162	0.364452	-12.242	1.85409e-34	3.70526e-32
NM_023464	Ssna1	197.339	-1.11403	0.349128	-3.19088	0.00141838	0.00482363
NM_023523	Pecr	2029.8	-1.02501	0.232406	-4.41041	1.03173e-05	5.69816e-05
NM_023530	Pla2g12b	31.4796	-3.98996	0.677045	-5.8932	3.78798e-09	3.86639e-08
NM_023536	Mrto4	176.131	-0.999758	0.326649	-3.06065	0.00220856	0.00712481
NM_023557	Slc44a4	62.1503	-2.67725	0.440366	-6.0796	1.20482e-09	1.34156e-08
NM_023603	Sfpq	3200.64	-1.20185	0.20707	-5.80408	6.47219e-09	6.32559e-08
NM_023631	Aox4	48.9156	-2.10076	0.616166	-3.40941	0.000651031	0.00241816
NM_023773	Mphosph8	17394.7	-0.956943	0.219449	-4.36066	1.29672e-05	7.01122e-05
NM_023821	Cmya5	1876.08	-0.736698	0.214354	-3.43683	0.000588572	0.00221542
NM_023844	Jam2	241.28	-1.8916	0.417218	-4.53385	5.7917e-06	3.34083e-05
NM_023858	Mtmr2	2408.6	-0.98963	0.28962	-3.417	0.00063315	0.00236156
NM_023887	Gcnt2	98.6479	-3.92882	1.22612	-3.20427	0.00135407	0.00462476
NM_023908	Slco3a1	5648.63	-2.40653	0.256546	-9.38053	6.56443e-21	3.17518e-19
NM_023913	Ern1	10437	-1.48691	0.202368	-7.34756	2.01854e-13	3.89511e-12
NM_024170	Cxx1a	141.265	-1.72194	0.377901	-4.55659	5.19901e-06	3.02307e-05
NM_024171	Sec61b	335.678	-1.09579	0.344367	-3.18204	0.00146242	0.00495012
NM_024176	Drap1	488.434	-0.981005	0.327652	-2.99404	0.00275308	0.00863564
NM_024200	Mfn1	2679.71	-0.770862	0.226859	-3.39798	0.000678854	0.0025074
NM_024206	Sec13	1108.92	-0.790483	0.228113	-3.46532	0.000529607	0.00202255
NM_024208	Echdc3	339.462	-1.15278	0.340911	-3.38146	0.000721016	0.00265152
NM_024210	2310033P09Rik	493.496	-1.29321	0.439325	-2.94363	0.00324386	0.00998947
NM_024222	Stt3b	10340	-0.66179	0.224653	-2.94584	0.00322079	0.00992642
NM_024231	Zfpl1	153.784	-1.53836	0.446806	-3.44302	0.000575263	0.00217017
NM_024240	Gins4	1530.03	-0.952928	0.267531	-3.56194	0.000368129	0.00145983
NM_024241	Kif24	1566.21	-0.819115	0.258167	-3.17281	0.00150972	0.00509209
NM_024242	Riok1	4755.06	-1.46532	0.226566	-6.46752	9.96277e-11	1.28559e-09
NM_024245	Kif23	8798.38	-2.13122	0.220725	-9.65554	4.65703e-22	2.58142e-20
NM_024251	Aplf	184.312	-1.14987	0.358858	-3.20426	0.00135411	0.00462476
NM_024263	Mxra8	247.766	-2.39036	0.382013	-6.25727	3.91768e-10	4.68148e-09
NM_024264	Cyp27a1	38.009	-2.54862	0.522435	-4.87835	1.06978e-06	7.07656e-06
NM_024282	Desi2	3350.58	-1.60829	0.297103	-5.41323	6.18971e-08	5.13151e-07
NM_024288	Rmnd5a	4002.7	-0.954366	0.271952	-3.50931	0.000449263	0.0017478
NM_024436	Rab22a	982.328	-0.788292	0.219731	-3.58753	0.000333822	0.0013374
NM_024437	Nudt7	285.686	-1.21854	0.278284	-4.37874	1.19367e-05	6.50034e-05
NM_024438	Dusp19	227.007	-1.20074	0.319628	-3.75667	0.000172191	0.000733793
NM_024440	Derl3	757.408	-2.70085	0.427361	-6.31984	2.61839e-10	3.19937e-09
NM_024449	Sost	62.6958	-1.51642	0.452454	-3.35156	0.000803587	0.00291704
NM_024452	Luzp1	5439.51	-1.39202	0.306829	-4.53679	5.71172e-06	3.29721e-05
NM_024478	Grpel1	509.962	-0.930602	0.249426	-3.73097	0.00019074	0.000804936
NM_025280	Kin	378.734	-1.04322	0.265677	-3.92663	8.61433e-05	0.000391485
NM_025287	Spop	1027.12	-1.62362	0.245475	-6.61418	3.73622e-11	5.1587e-10
NM_025296	Ciao1	571.267	-0.859437	0.222778	-3.85782	0.000114403	0.000505986
NM_025310	Ftsj3	1932.88	-1.60674	0.297842	-5.39459	6.86788e-08	5.65976e-07
NM_025319	0610009B22Rik	2294.38	-1.29849	0.238869	-5.43599	5.44934e-08	4.55501e-07
NM_025341	Abhd6	447.575	-0.8173	0.265613	-3.07703	0.00209076	0.0067924
NM_025345	Fopnl	227.389	-0.96475	0.294218	-3.27904	0.00104162	0.00366973
NM_025350	Cpa1	4502.07	-0.858921	0.21989	-3.90614	9.37828e-05	0.000422287
NM_025372	Tipin	722.208	-1.12367	0.253008	-4.44123	8.94477e-06	4.99093e-05
NM_025380	Eef1e1	428.942	-1.26609	0.421011	-3.00725	0.00263625	0.00830864
NM_025401	Ubl5	584.971	-1.09672	0.324708	-3.37754	0.000731363	0.00268502
NM_025414	Myo19	1101.33	-1.37426	0.24962	-5.50541	3.68304e-08	3.17109e-07
NM_025418	Vta1	1708.39	-0.817475	0.222212	-3.6788	0.000234335	0.000972959
NM_025419	1110059G10Rik	393.652	-2.59878	0.322322	-8.06267	7.46444e-16	1.90538e-14
NM_025430	Mrpl35	939.57	-0.760758	0.226413	-3.36005	0.000779285	0.00284104
NM_025437	Eif1ax	1026.39	-1.1546	0.25748	-4.48425	7.31695e-06	4.14354e-05
NM_025446	Aig1	311.61	-1.79357	0.281581	-6.36963	1.89486e-10	2.36088e-09
NM_025463	1810009A15Rik	70.7136	-1.35382	0.453038	-2.98831	0.00280523	0.00878291
NM_025465	Tma16	127.677	-1.82342	0.329398	-5.53561	3.10147e-08	2.70875e-07
NM_025474	Mrps14	633.538	-0.892209	0.266484	-3.34808	0.000813724	0.0029496
NM_025480	Tmem128	116.732	-1.67399	0.367504	-4.55503	5.23777e-06	3.04328e-05
NM_025487	1700011A15Rik	46.1578	-1.89444	0.517979	-3.65736	0.000254824	0.00104942
NM_025503	1700029P11Rik	95.4087	-1.9967	0.437566	-4.56321	5.03776e-06	2.9417e-05
NM_025507	Snw1	1431.73	-0.903976	0.229228	-3.94356	8.02809e-05	0.000366929
NM_025513	Exosc3	427.167	-1.24057	0.27009	-4.59318	4.36551e-06	2.5809e-05
NM_025514	Anapc16	2030.86	-0.733469	0.230244	-3.18562	0.00144446	0.00490025
NM_025525	Rnf113a2	911.81	-1.69336	0.232541	-7.28197	3.28971e-13	6.13056e-12
NM_025534	Ccdc82	264.692	-1.29737	0.295527	-4.39003	1.13334e-05	6.20967e-05
NM_025535	Sar1b	1165.46	-1.12509	0.234798	-4.79172	1.65354e-06	1.05832e-05
NM_025539	Nudt2	102.622	-1.48783	0.414309	-3.59112	0.000329261	0.00132122
NM_025564	Magohb	31.1337	-2.58715	0.617212	-4.19167	2.76908e-05	0.000140423
NM_025571	Pam16	42.7523	-1.76406	0.505307	-3.49107	0.000481091	0.00185641
NM_025574	Pyurf	151.672	-1.62627	0.398136	-4.08471	4.41318e-05	0.000214488
NM_025578	Mrps25	947.087	-2.11436	0.296759	-7.12485	1.04192e-12	1.8106e-11
NM_025581	Ska1	24.2648	-3.50782	0.935651	-3.74907	0.000177489	0.000755522
NM_025594	Zmat2	791.31	-0.812369	0.24822	-3.27278	0.00106496	0.00374374
NM_025597	Ndufb3	217.661	-1.12576	0.298614	-3.76995	0.000163282	0.000698767
NM_025602	Ccdc59	489.603	-1.22551	0.334429	-3.66448	0.000247846	0.00102346
NM_025645	Snrnp40	993.133	-1.15971	0.270986	-4.27961	1.87224e-05	9.81551e-05
NM_025653	3110001I22Rik	1004.16	-1.57163	0.308182	-5.09969	3.40209e-07	2.47704e-06
NM_025664	Snx9	3454.88	-1.23969	0.294604	-4.20799	2.5765e-05	0.000131536
NM_025665	Snrnp27	721.375	-0.989853	0.22065	-4.48609	7.25431e-06	4.11267e-05
NM_025675	Dph6	8037.25	-1.64705	0.42184	-3.90444	9.44437e-05	0.000424759
NM_025686	Brf2	207.706	-1.21003	0.300712	-4.0239	5.72427e-05	0.000270842
NM_025695	Smc6	7974.89	-0.839795	0.232253	-3.61587	0.000299346	0.00121466
NM_025699	Oser1	2239.14	-1.53863	0.258378	-5.95496	2.60139e-09	2.73614e-08
NM_025706	Tbc1d15	16740.1	-1.13401	0.276884	-4.09561	4.21057e-05	0.000205892
NM_025708	Tmem186	199.803	-1.49099	0.316676	-4.70824	2.49866e-06	1.55595e-05
NM_025722	4921524J17Rik	1834.23	-1.52393	0.364267	-4.18355	2.86988e-05	0.000144954
NM_025739	Rnf220	5120.44	-0.826702	0.212537	-3.88968	0.000100378	0.000449317
NM_025747	Cfap97	7185.32	-1.27625	0.26598	-4.7983	1.60019e-06	1.02677e-05
NM_025755	Pacrgl	2383.3	-1.52908	0.246575	-6.2013	5.59973e-10	6.52213e-09
NM_025774	Prkrip1	1404.18	-0.909751	0.24051	-3.7826	0.0001552	0.000666432
NM_025779	Ccdc109b	57.1215	-1.66375	0.428957	-3.8786	0.000105059	0.000468751
NM_025812	Hmg20a	2563.11	-1.02051	0.280007	-3.6446	0.000267811	0.00109962
NM_025819	Swt1	2972.67	-1.63311	0.353609	-4.61841	3.86693e-06	2.3136e-05
NM_025821	Carhsp1	3804.27	-0.864641	0.250806	-3.44744	0.000565917	0.0021381
NM_025829	Eif4e3	8229.69	-2.41063	0.205716	-11.7182	1.02775e-31	1.54549e-29
NM_025832	Naa16	1939.06	-1.37422	0.31269	-4.39482	1.10867e-05	6.08106e-05
NM_025833	Baiap2l1	7640.74	-1.15435	0.240688	-4.79604	1.61833e-06	1.03695e-05
NM_025845	Prpf38b	5328.61	-1.12901	0.220568	-5.11866	3.07716e-07	2.25777e-06
NM_025850	Fank1	381.144	-1.02248	0.305476	-3.34719	0.000816358	0.00295708
NM_025853	Dsn1	2311.79	-1.49706	0.271162	-5.52089	3.37291e-08	2.93233e-07
NM_025863	Trim59	547.436	-1.53517	0.493134	-3.11308	0.00185145	0.00610771
NM_025873	Trit1	624.381	-0.78885	0.223238	-3.53366	0.00040984	0.00161135
NM_025882	Pole4	2533.85	-1.63375	0.343442	-4.75698	1.96515e-06	1.24413e-05
NM_025884	Zfp830	1701.86	-2.59677	0.273112	-9.5081	1.9417e-21	1.00308e-19
NM_025895	Med28	4490.29	-1.6306	0.222829	-7.31774	2.52189e-13	4.77586e-12
NM_025900	Dek	5109.5	-0.801918	0.227148	-3.53038	0.00041496	0.00162979
NM_025904	Yae1d1	630.027	-1.50803	0.27211	-5.542	2.9903e-08	2.62372e-07
NM_025907	Mettl6	752.553	-1.29106	0.292698	-4.41091	1.02936e-05	5.68922e-05
NM_025926	Dnajb4	266.954	-3.26111	0.334991	-9.73493	2.13964e-22	1.28956e-20
NM_025948	Lsm14a	9800.98	-1.52496	0.215953	-7.06153	1.64679e-12	2.80083e-11
NM_025950	Cdc37l1	1898.9	-2.613	0.283507	-9.21673	3.06298e-20	1.37229e-18
NM_025968	Ptgr1	251.524	-1.22986	0.390716	-3.1477	0.00164561	0.00549548
NM_025979	Mastl	5991.87	-1.85545	0.329062	-5.63861	1.71427e-08	1.56015e-07
NM_025985	Ube2g1	10304.5	-1.01866	0.318714	-3.19616	0.00139271	0.00474376
NM_025999	Rnf141	483.594	-1.29684	0.336131	-3.85813	0.000114258	0.000505639
NM_026009	Ccdc47	5868.03	-0.898459	0.217928	-4.12274	3.74395e-05	0.00018474
NM_026013	Dram2	194.87	-1.56284	0.481711	-3.24435	0.0011772	0.00408106
NM_026021	Zmynd19	931.96	-0.919706	0.24026	-3.82797	0.000129207	0.000566511
NM_026024	Ube2t	1401.38	-1.24708	0.273588	-4.55824	5.15837e-06	3.00262e-05
NM_026025	Zcrb1	2471.43	-0.850145	0.236898	-3.58865	0.000332398	0.0013324
NM_026034	Armc10	1434.37	-3.31562	0.236825	-14.0003	1.55263e-44	8.13152e-42
NM_026046	Zfp329	334.505	-1.86101	0.369132	-5.04159	4.61683e-07	3.2874e-06
NM_026053	Gemin6	377.37	-1.61871	0.317438	-5.09929	3.40922e-07	2.48104e-06
NM_026054	2810474O19Rik	14481.1	-1.422	0.364125	-3.90526	9.41254e-05	0.000423704
NM_026062	Fam69a	341.471	-2.19585	0.317868	-6.90804	4.91381e-12	7.7098e-11
NM_026068	Med31	338.148	-0.866321	0.277774	-3.1188	0.00181592	0.00600353
NM_026072	Cwc27	702.749	-0.940264	0.236708	-3.97225	7.11955e-05	0.000329068
NM_026075	Srek1ip1	1708.92	-1.38668	0.342389	-4.05002	5.12131e-05	0.000245216
NM_026077	3110040N11Rik	107.252	-1.47846	0.47634	-3.1038	0.00191055	0.00627269
NM_026083	Zc3h13	12819.6	-0.906332	0.293898	-3.08384	0.0020435	0.00666023
NM_026104	Tmco5	12.6821	-2.90122	0.862921	-3.36209	0.000773542	0.00282214
NM_026107	Zkscan6	786.717	-1.42116	0.308859	-4.60133	4.19803e-06	2.48964e-05
NM_026112	Zfp606	208.891	-1.91497	0.494853	-3.86978	0.000108932	0.000484045
NM_026119	Med4	760.816	-1.2102	0.253191	-4.77981	1.75465e-06	1.11879e-05
NM_026123	Unc50	4332.41	-2.18425	0.277689	-7.86582	3.667e-15	8.78638e-14
NM_026125	Fam132a	134.591	-1.1913	0.337508	-3.5297	0.000416028	0.00163336
NM_026142	3632451O06Rik	28.7741	-2.4277	0.608156	-3.9919	6.55467e-05	0.000305375
NM_026150	4921536K21Rik	303.288	-1.617	0.335246	-4.82333	1.4118e-06	9.17519e-06
NM_026157	Mtpap	1712.91	-1.53799	0.301298	-5.10453	3.31622e-07	2.41683e-06
NM_026167	Klhl13	1804.97	-2.51992	0.369201	-6.82534	8.77184e-12	1.32564e-10
NM_026175	Sf3a1	3153.09	-0.714326	0.197914	-3.60928	0.000307044	0.00124158
NM_026181	Gpatch1	1326.59	-0.920392	0.204101	-4.5095	6.49806e-06	3.72004e-05
NM_026183	Slc47a1	11.7158	-4.57904	1.05671	-4.33331	1.46885e-05	7.87464e-05
NM_026184	Ero1lb	2134.29	-1.07094	0.294507	-3.6364	0.000276477	0.00113429
NM_026194	Ufl1	1367.18	-1.76435	0.298599	-5.90876	3.4469e-09	3.55166e-08
NM_026201	Ccar1	3605.88	-0.912009	0.284305	-3.20785	0.00133729	0.00457347
NM_026213	Ttc33	637.742	-2.5384	0.247017	-10.2762	9.02018e-25	6.95424e-23
NM_026273	4930453N24Rik	737.744	-1.6059	0.328848	-4.88342	1.04262e-06	6.9271e-06
NM_026281	Tm7sf3	2072.81	-1.28456	0.271519	-4.73103	2.23383e-06	1.40022e-05
NM_026290	Armc12	14.2667	-3.3852	0.840144	-4.02931	5.59406e-05	0.000265508
NM_026309	Lsm3	668.771	-0.970261	0.268889	-3.60841	0.000308078	0.00124477
NM_026313	Luc7l3	5949.76	-0.668788	0.220875	-3.0279	0.00246262	0.00784279
NM_026317	Prss37	27.5531	-1.93086	0.635021	-3.04063	0.00236087	0.00754705
NM_026318	Hypk	1006.38	-1.16773	0.236826	-4.93075	8.19166e-07	5.54928e-06
NM_026319	Ift74	495.477	-0.830095	0.245398	-3.38265	0.000717908	0.00264086
NM_026329	Polr2g	1029.95	-1.43808	0.246793	-5.82709	5.64018e-09	5.55893e-08
NM_026345	Mansc1	2017.99	-2.96737	0.296451	-10.0097	1.38236e-23	9.33127e-22
NM_026351	Ttc39d	43.8112	-2.54715	0.697615	-3.65122	0.000260999	0.00107282
NM_026364	Prpsap1	911.908	-0.866829	0.221891	-3.90656	9.36191e-05	0.0004217
NM_026367	Gpatch2	646.032	-0.991595	0.252303	-3.93017	8.48847e-05	0.000386112
NM_026377	Sfr1	8719.87	-0.981979	0.257333	-3.81599	0.000135636	0.000591968
NM_026396	Brix1	3039.29	-0.942627	0.283354	-3.32668	0.00087888	0.00315566
NM_026404	Slc35a4	199.114	-2.58893	0.359486	-7.20174	5.94479e-13	1.05849e-11
NM_026409	Ddx55	73.7548	-1.40754	0.473349	-2.97359	0.00294337	0.00917379
NM_026412	Knstrn	2564.13	-3.28895	0.339559	-9.68595	3.4597e-22	1.97541e-20
NM_026417	Yipf4	253.497	-1.71217	0.417972	-4.09638	4.19669e-05	0.000205346
NM_026418	Rgs10	249.434	-2.70078	0.465428	-5.80279	6.52197e-09	6.37014e-08
NM_026420	Paip2	4192.91	-1.57529	0.316336	-4.9798	6.36516e-07	4.41031e-06
NM_026430	Uxs1	432.574	-1.15988	0.312625	-3.71012	0.000207161	0.000867244
NM_026432	Saraf	1245.48	-0.675034	0.219968	-3.06878	0.00214935	0.00696041
NM_026434	Rbm18	530.284	-0.885009	0.252074	-3.5109	0.000446587	0.00173873
NM_026438	Ppa1	871.166	-1.86903	0.3165	-5.90531	3.51989e-09	3.61461e-08
NM_026442	Cmc1	294.414	-0.863584	0.273055	-3.16268	0.00156325	0.00525046
NM_026444	Cs	6256.54	-0.798512	0.223611	-3.57098	0.000355643	0.00141512
NM_026445	Sumf2	126.113	-1.61904	0.521311	-3.10572	0.00189819	0.00624021
NM_026446	Rgs19	121.333	-1.32983	0.397065	-3.34915	0.000810592	0.00293895
NM_026470	Spata6	354.466	-1.0188	0.323941	-3.145	0.00166087	0.00553795
NM_026479	Zcchc10	3207.64	-1.36057	0.358955	-3.79036	0.000150431	0.000649078
NM_026482	Atp2b1	5006.06	-1.05144	0.204996	-5.12908	2.91159e-07	2.1425e-06
NM_026483	Mphosph10	4351.67	-1.21472	0.209375	-5.80164	6.56687e-09	6.40987e-08
NM_026487	Atad1	10111.8	-1.22638	0.385376	-3.18229	0.00146114	0.00494802
NM_026506	Snrpg	151.436	-1.18789	0.336083	-3.53452	0.000408518	0.0016068
NM_026520	Fam122a	667.953	-2.04655	0.264382	-7.74087	9.87355e-15	2.25164e-13
NM_026529	2700062C07Rik	1717.87	-0.790239	0.232537	-3.39833	0.000677975	0.00250476
NM_026550	Pak1ip1	1570.2	-1.40593	0.277162	-5.07261	3.92402e-07	2.82054e-06
NM_026554	Ncbp2	2257.28	-0.77882	0.201365	-3.8677	0.000109865	0.000487761
NM_026562	Cntd1	98.3471	-1.66067	0.436875	-3.80126	0.000143965	0.000624547
NM_026570	Yeats4	1164.5	-0.885629	0.264919	-3.34301	0.000828739	0.00299688
NM_026574	Ino80	1427.1	-0.786544	0.265511	-2.96238	0.00305271	0.0094699
NM_026579	D10Wsu102e	27750.3	-2.35681	0.280382	-8.40572	4.25233e-17	1.28654e-15
NM_026582	Wls	93.1585	-1.41847	0.453131	-3.13037	0.00174585	0.00579079
NM_026591	Mrpl24	401.446	-0.762516	0.25617	-2.9766	0.00291463	0.00909728
NM_026594	Rpl39l	298.402	-1.22452	0.277367	-4.41478	1.01111e-05	5.59444e-05
NM_026632	Rpa3	136.964	-2.04816	0.425394	-4.81474	1.47388e-06	9.52971e-06
NM_026637	Ggct	7198.62	-1.98458	0.214479	-9.25302	2.18244e-20	9.9242e-19
NM_026655	2310057M21Rik	712.88	-1.11451	0.252809	-4.40849	1.04092e-05	5.74265e-05
NM_026670	Zmym1	1312.64	-1.98909	0.285804	-6.95962	3.41182e-12	5.50093e-11
NM_026674	Aph1c	1136.43	-2.01147	0.344818	-5.83343	5.42983e-09	5.37537e-08
NM_026708	Tlcd1	101.612	-2.03327	0.407936	-4.9843	6.21868e-07	4.31867e-06
NM_026718	Ankrd13a	3734.08	-0.664479	0.19522	-3.40374	0.000664695	0.00246061
NM_026732	Mrpl14	126.611	-2.10777	0.425545	-4.9531	7.30394e-07	5.00218e-06
NM_026742	Ndufaf4	2419.65	-0.825577	0.235767	-3.50166	0.00046237	0.00179282
NM_026746	Nsmce2	5391.61	-0.9352	0.294069	-3.18021	0.00147168	0.00497594
NM_026753	Fam96b	203.061	-1.27933	0.307698	-4.15776	3.21378e-05	0.000160457
NM_026758	Mphosph6	7043.35	-2.15028	0.256065	-8.39739	4.56509e-17	1.37569e-15
NM_026760	2310036O22Rik	318.42	-1.05782	0.294481	-3.59215	0.000327967	0.00131672
NM_026780	Syf2	1664.76	-0.801767	0.25194	-3.18237	0.00146074	0.00494774
NM_026787	1110012L19Rik	611.976	-0.800037	0.237966	-3.36197	0.000773879	0.00282269
NM_026798	Tmem216	194.263	-1.05976	0.292264	-3.62605	0.00028779	0.00117309
NM_026805	Svop	105.18	-2.4727	0.505006	-4.89638	9.76197e-07	6.52287e-06
NM_026825	Lrrc16a	4933.46	-0.931669	0.232448	-4.00807	6.12172e-05	0.000287853
NM_026835	Ms4a6d	51.2719	-2.52001	0.580985	-4.33748	1.44125e-05	7.74308e-05
NM_026841	Prr32	97.0442	-7.24276	0.791807	-9.14713	5.84661e-20	2.52268e-18
NM_026842	Ubqln1	347.832	-1.00889	0.263208	-3.83304	0.000126571	0.000555434
NM_026865	Ptges3l	58.9765	-2.5047	0.444355	-5.63671	1.73331e-08	1.57543e-07
NM_026886	Srrm4	64.1644	-1.77633	0.502968	-3.5317	0.000412901	0.00162255
NM_026893	Dcaf12	4001.12	-1.06496	0.239489	-4.4468	8.71592e-06	4.87219e-05
NM_026909	Thap7	242.979	-1.69202	0.384142	-4.40466	1.05951e-05	5.83881e-05
NM_026911	Spcs1	346.019	-1.28385	0.318075	-4.03629	5.4302e-05	0.000258864
NM_026917	Zdhhc3	329.031	-1.3821	0.250158	-5.5249	3.29665e-08	2.87096e-07
NM_026922	Atp2c2	401.815	-1.29127	0.336303	-3.8396	0.000123234	0.000542201
NM_026934	Zc3h15	2251.24	-0.701847	0.225077	-3.11825	0.00181928	0.006012
NM_026949	Cnot8	815.385	-0.985647	0.246177	-4.00382	6.23285e-05	0.000292265
NM_026963	Lzic	400.671	-2.29562	0.333518	-6.88304	5.85866e-12	9.07046e-11
NM_026985	Mcemp1	46.6166	-4.09296	0.651554	-6.28184	3.34592e-10	4.02997e-09
NM_027001	Pdzph1	100.585	-3.40731	0.601328	-5.66631	1.45901e-08	1.34381e-07
NM_027014	Gins1	312.75	-1.86031	0.371339	-5.00975	5.45019e-07	3.82934e-06
NM_027045	Ccser2	807.719	-1.58466	0.40682	-3.89525	9.80995e-05	0.000439898
NM_027101	Polr2d	132.736	-2.17287	0.359628	-6.04199	1.52228e-09	1.67055e-08
NM_027117	Klhdc2	4442.08	-0.8103	0.214308	-3.78101	0.000156191	0.000670312
NM_027134	Mtfmt	114.507	-2.02094	0.440522	-4.58761	4.48354e-06	2.64862e-05
NM_027144	Arhgef12	5480.39	-1.18543	0.258816	-4.58019	4.64552e-06	2.73579e-05
NM_027149	Wdr20	3882.38	-3.18806	0.307782	-10.3582	3.84197e-25	3.09949e-23
NM_027152	Cd164l2	1802.93	-1.17619	0.310686	-3.78576	0.000153238	0.000659501
NM_027153	Pir	16.2032	-3.33432	0.978994	-3.40587	0.000659546	0.00244322
NM_027154	Tmbim1	1697.91	-1.31067	0.303352	-4.32061	1.55599e-05	8.29497e-05
NM_027158	Upk3bl	62.8684	-2.59287	0.492994	-5.25943	1.445e-07	1.1203e-06
NM_027159	Ccdc115	4149.16	-1.3094	0.252461	-5.18657	2.14207e-07	1.62021e-06
NM_027166	Ypel5	3322.71	-0.931565	0.218815	-4.25733	2.06887e-05	0.00010772
NM_027189	Gemin7	1296.03	-1.5934	0.24339	-6.54669	5.88271e-11	7.89979e-10
NM_027213	Med6	1095.83	-0.962748	0.236275	-4.0747	4.60737e-05	0.000223167
NM_027225	Cobll1	238.312	-1.29666	0.281312	-4.60932	4.03981e-06	2.40425e-05
NM_027251	2010107G23Rik	2172.42	-1.61372	0.240423	-6.71197	1.92009e-11	2.76159e-10
NM_027261	Taf1d	51.216	-1.9263	0.459916	-4.18837	2.80968e-05	0.000142292
NM_027263	Apitd1	1273.82	-1.44453	0.308321	-4.68515	2.79755e-06	1.7244e-05
NM_027270	Exoc1	3361.97	-0.639677	0.211406	-3.02582	0.00247958	0.00788692
NM_027294	Cmtm8	192.601	-3.9845	1.24782	-3.19316	0.00140723	0.00478895
NM_027314	March5	3708.55	-0.910544	0.27002	-3.37213	0.000745889	0.00273307
NM_027322	Prrg1	21.0507	-5.16538	0.903254	-5.71864	1.07382e-08	1.01299e-07
NM_027326	Mllt3	4634.61	-1.37586	0.213871	-6.43314	1.24991e-10	1.59527e-09
NM_027328	Prpf31	26.5372	-2.03976	0.616784	-3.3071	0.000942678	0.00336247
NM_027351	Ppil3	252.505	-2.86742	0.396475	-7.23228	4.74934e-13	8.62835e-12
NM_027353	Cd2bp2	857.582	-0.835869	0.264016	-3.16597	0.00154566	0.00519484
NM_027355	Rnf168	6746.08	-0.739603	0.236708	-3.12453	0.00178087	0.00589405
NM_027360	2010107E04Rik	281.59	-1.03693	0.321123	-3.22906	0.00124199	0.00428032
NM_027371	Rpf1	226.313	-1.05617	0.263384	-4.01	6.07179e-05	0.000285771
NM_027381	Cactin	586.999	-1.35381	0.34194	-3.95919	7.52043e-05	0.000345494
NM_027405	Gpatch2l	1016.92	-0.805304	0.22149	-3.63585	0.000277063	0.00113638
NM_027407	Ica1l	380.445	-0.872897	0.271228	-3.21831	0.00128948	0.00442992
NM_027409	Mospd1	3224.23	-0.952901	0.294055	-3.24056	0.00119297	0.00412729
NM_027426	Draxin	379.053	-3.13597	0.398113	-7.8771	3.3507e-15	8.07784e-14
NM_027468	Cpm	326.918	-1.17227	0.365119	-3.21064	0.00132438	0.00453441
NM_027470	Pak4	3154.68	-1.53719	0.289881	-5.30282	1.14026e-07	9.01991e-07
NM_027490	Dcp2	4843.62	-1.55564	0.326367	-4.76654	1.87416e-06	1.19e-05
NM_027493	Actr8	1011.33	-1.85953	0.253302	-7.34115	2.11764e-13	4.06096e-12
NM_027494	Zcchc8	3959.06	-1.55162	0.268157	-5.78624	7.19774e-09	6.9719e-08
NM_027532	Anapc15	964.576	-1.6427	0.327543	-5.01522	5.29724e-07	3.73859e-06
NM_027545	Cwf19l2	2263.03	-1.9802	0.258522	-7.6597	1.86363e-14	4.06678e-13
NM_027554	Usp38	5160.14	-1.13637	0.192171	-5.91332	3.35289e-09	3.46891e-08
NM_027557	Pwwp2a	174.933	-1.29785	0.296736	-4.37376	1.22126e-05	6.6387e-05
NM_027558	Pgrmc2	678.09	-0.892015	0.21697	-4.11124	3.93537e-05	0.00019362
NM_027560	Arrdc2	466.117	-2.597	0.327462	-7.93069	2.17931e-15	5.35588e-14
NM_027570	Ldhd	287.419	-1.28041	0.402121	-3.18414	0.00145185	0.00492094
NM_027585	Cnbd2	141.775	-1.62263	0.522216	-3.10719	0.00188873	0.00621718
NM_027604	Usp15	7959.69	-1.35057	0.267132	-5.05581	4.28568e-07	3.06022e-06
NM_027614	Wdr20rt	45.7424	-3.18537	0.613085	-5.19564	2.04013e-07	1.5485e-06
NM_027630	Ccdc105	430.268	-1.87064	0.248772	-7.51949	5.49898e-14	1.12407e-12
NM_027642	Phf6	2602	-1.22302	0.30644	-3.99107	6.57767e-05	0.000306353
NM_027669	Sept12	31.1148	-4.95933	0.777997	-6.37449	1.83571e-10	2.29282e-09
NM_027698	Eri2	623.24	-1.61836	0.323044	-5.00972	5.45104e-07	3.82934e-06
NM_027707	Nipbl	352.264	-0.944522	0.31766	-2.97337	0.00294547	0.00917845
NM_027711	Iqgap2	5097.27	-2.14633	0.255279	-8.40778	4.17842e-17	1.2667e-15
NM_027717	Dydc2	32.6463	-2.96481	0.638481	-4.64353	3.42506e-06	2.0725e-05
NM_027721	Katnal2	149.001	-1.52287	0.382521	-3.98114	6.85847e-05	0.000318065
NM_027741	Mro	182.458	-2.02307	0.352328	-5.74199	9.35688e-09	8.92666e-08
NM_027748	Taf3	12637.8	-1.97309	0.230415	-8.56321	1.09768e-17	3.55469e-16
NM_027772	Pdss2	73.3357	-1.57363	0.452396	-3.47844	0.000504332	0.00193625
NM_027777	Pex1	1097.14	-1.15833	0.223542	-5.18171	2.1986e-07	1.65637e-06
NM_027799	Ankrd40	919.573	-1.39426	0.263277	-5.29579	1.18503e-07	9.34003e-07
NM_027802	Obox1	5407.42	-2.68802	0.316596	-8.49038	2.0597e-17	6.44626e-16
NM_027839	Ceacam20	606.081	-4.14643	0.336576	-12.3195	7.11737e-35	1.61341e-32
NM_027861	Brox	1108.71	-1.66912	0.2465	-6.77129	1.27636e-11	1.88574e-10
NM_027866	Colec11	11.2933	-3.66046	1.01167	-3.61823	0.000296627	0.00120459
NM_027877	Mus81	192.433	-1.66684	0.356202	-4.67948	2.87603e-06	1.77062e-05
NM_027892	Ppp1r12a	6439.02	-1.66083	0.205427	-8.08475	6.22932e-16	1.61452e-14
NM_027897	Rhpn2	17458	-1.07727	0.186256	-5.78379	7.30374e-09	7.06106e-08
NM_027911	Raver1	4210.31	-1.03495	0.222487	-4.65172	3.29171e-06	1.99818e-05
NM_027914	Bbs10	214.301	-3.99835	0.525393	-7.6102	2.73675e-14	5.85434e-13
NM_027927	Ints12	4428.55	-1.02178	0.247679	-4.12542	3.70066e-05	0.000182842
NM_027935	Tmem50a	997.411	-0.954482	0.231988	-4.11435	3.88264e-05	0.000191211
NM_027946	Dcaf7	5810.39	-0.998593	0.213487	-4.67754	2.90339e-06	1.78601e-05
NM_027951	Tekt4	36.0271	-2.70216	0.753185	-3.58765	0.000333676	0.00133717
NM_027961	Wfdc3	302.777	-2.82181	0.409927	-6.88369	5.83202e-12	9.03845e-11
NM_027967	Fam217a	846.325	-1.62714	0.240104	-6.77683	1.22843e-11	1.81668e-10
NM_027971	Serpinb12	19.4178	-5.41774	0.983142	-5.51064	3.57522e-08	3.0835e-07
NM_027985	Mad2l2	332.412	-1.35636	0.412799	-3.28576	0.00101706	0.0035957
NM_027988	Noxo1	135.174	-1.44277	0.361895	-3.98673	6.69908e-05	0.000311339
NM_028006	Tube1	412.254	-1.19203	0.294718	-4.04466	5.23982e-05	0.000250693
NM_028015	Cers5	1344.29	-1.08011	0.257686	-4.19157	2.77037e-05	0.000140442
NM_028030	Rbpms2	8543.93	-1.05356	0.243165	-4.33267	1.47312e-05	7.88918e-05
NM_028031	Zdhhc13	833.257	-1.6353	0.363593	-4.49762	6.87189e-06	3.91633e-05
NM_028033	2410012M07Rik	388.835	-1.00621	0.321104	-3.13359	0.00172684	0.00573774
NM_028034	Tdrd12	1600.84	-1.997	0.239515	-8.33768	7.57598e-17	2.20429e-15
NM_028038	Ddx28	648.596	-1.41677	0.264176	-5.36298	8.18596e-08	6.65926e-07
NM_028043	Cnot11	2137.65	-0.974417	0.308558	-3.15797	0.00158873	0.00532608
NM_028053	Tmem38b	697.972	-1.18459	0.316719	-3.74018	0.000183891	0.000779498
NM_028059	Zfp654	2061.49	-2.03248	0.281571	-7.21836	5.26183e-13	9.43527e-12
NM_028085	Anks4b	618.725	-1.64744	0.247947	-6.6443	3.04657e-11	4.24507e-10
NM_028106	Zbed3	238236	-0.888634	0.29086	-3.0552	0.00224914	0.00724034
NM_028121	Adpgk	818.793	-1.55209	0.3451	-4.49752	6.8752e-06	3.91675e-05
NM_028123	Slc37a3	378.026	-0.820293	0.25559	-3.20941	0.00133007	0.00454979
NM_028128	Rfc5	208.961	-0.892063	0.292109	-3.05387	0.00225909	0.00726622
NM_028138	Thumpd2	29.3738	-2.15381	0.571233	-3.77046	0.000162949	0.000697539
NM_028142	Nsun4	1722.15	-2.8272	0.226613	-12.4759	1.0108e-35	2.39876e-33
NM_028152	Mms19	768.924	-1.27228	0.216088	-5.88777	3.91447e-09	3.98746e-08
NM_028170	1700030K09Rik	202.383	-1.65005	0.34104	-4.8383	1.30955e-06	8.55095e-06
NM_028175	Lrrc8e	1146.92	-1.24833	0.288469	-4.32743	1.50862e-05	8.05943e-05
NM_028181	Ccpg1	112.602	-1.15615	0.3637	-3.17886	0.00147858	0.00499703
NM_028200	Vps9d1	1264.82	-1.3997	0.31749	-4.40864	1.04021e-05	5.74084e-05
NM_028221	Fam192a	2105.88	-0.830763	0.236191	-3.51733	0.000435904	0.00170062
NM_028226	Rbm12b1	497.6	-0.941022	0.236726	-3.97515	7.03355e-05	0.00032539
NM_028238	Rab38	2928.93	-1.09196	0.223261	-4.89097	1.00338e-06	6.68097e-06
NM_028248	Tmem87b	2011.83	-1.3951	0.289359	-4.82135	1.4259e-06	9.25099e-06
NM_028260	Immp1l	597.98	-1.81516	0.348948	-5.20181	1.97362e-07	1.50026e-06
NM_028281	Pcbd2	1150.16	-0.79427	0.263716	-3.01184	0.00259669	0.00820609
NM_028295	Pdia5	213.066	-1.34362	0.372146	-3.61046	0.000305654	0.00123695
NM_028296	Car10	516.046	-1.82304	0.478248	-3.8119	0.000137901	0.000601331
NM_028298	Zfp655	5632.48	-1.62171	0.269514	-6.01716	1.77504e-09	1.92566e-08
NM_028299	2700029M09Rik	5066.87	-1.81566	0.311022	-5.83772	5.29185e-09	5.25738e-08
NM_028303	Pdzd11	1353.51	-1.3249	0.255571	-5.18406	2.17108e-07	1.63807e-06
NM_028307	Tdrkh	879.785	-1.67152	0.303674	-5.50434	3.70546e-08	3.18859e-07
NM_028354	Tdp1	525.716	-0.914747	0.245727	-3.72262	0.000197165	0.000829514
NM_028376	Pfn4	120.049	-2.77439	0.364759	-7.60608	2.82541e-14	6.01856e-13
NM_028387	Macrod2	1975.07	-1.61746	0.211749	-7.63855	2.19685e-14	4.75974e-13
NM_028394	Hspb11	29.8718	-2.5367	0.616057	-4.11764	3.82767e-05	0.000188627
NM_028399	Ccnt2	1539.3	-1.72564	0.335997	-5.13586	2.80851e-07	2.0757e-06
NM_028439	3110009E18Rik	39.2755	-1.79173	0.52113	-3.43816	0.000585686	0.00220675
NM_028478	Rassf6	191.779	-1.48483	0.351059	-4.22958	2.34126e-05	0.000120539
NM_028481	Ccdc18	1857.55	-1.09856	0.214261	-5.12721	2.9406e-07	2.1628e-06
NM_028500	Calr3	44.2195	-2.09714	0.523041	-4.00951	6.08461e-05	0.000286197
NM_028516	1700056E22Rik	73.1005	-1.8323	0.455476	-4.02282	5.75048e-05	0.000271997
NM_028521	Phospho2	3504.63	-2.42144	0.224386	-10.7914	3.77966e-27	3.90514e-25
NM_028523	Dcbld2	5996.18	-1.1057	0.263499	-4.19623	2.714e-05	0.00013786
NM_028561	Speer4b	27.7773	-3.26611	0.837909	-3.89793	9.70168e-05	0.000435429
NM_028604	Trmt11	136.416	-1.80076	0.438619	-4.10553	4.03393e-05	0.000198084
NM_028611	Ndufaf7	345.087	-0.99679	0.286084	-3.48425	0.000493509	0.0018995
NM_028615	Dppa2	597.854	-3.28399	0.238433	-13.7732	3.69345e-43	1.55823e-40
NM_028665	Ankrd42	234.491	-1.00472	0.327189	-3.07075	0.00213522	0.00691759
NM_028672	Fam161a	176.06	-2.21545	0.373864	-5.92583	3.10716e-09	3.2323e-08
NM_028719	Cpne4	10.6733	-4.50947	1.0523	-4.28533	1.82466e-05	9.58926e-05
NM_028730	Pex26	1761.27	-0.786939	0.240728	-3.269	0.0010793	0.00378446
NM_028731	Esyt2	3391.37	-1.56871	0.27062	-5.79671	6.76292e-09	6.58854e-08
NM_028756	Slc35a5	653.698	-2.13596	0.49432	-4.32101	1.55315e-05	8.28275e-05
NM_028765	Acoxl	107.638	-1.59786	0.386544	-4.1337	3.56964e-05	0.000176927
NM_028779	Ampd2	166.068	-4.46158	0.588665	-7.57915	3.47823e-14	7.2966e-13
NM_028788	Stra6l	615.091	-0.949869	0.227633	-4.17281	3.00869e-05	0.000151161
NM_028797	Gtsf1	1800.57	-1.21368	0.231251	-5.24831	1.53502e-07	1.18525e-06
NM_028804	Ccdc3	1591.9	-1.68473	0.280324	-6.00993	1.85603e-09	2.01209e-08
NM_028836	Ctbs	318.878	-2.06879	0.403003	-5.13343	2.84512e-07	2.10071e-06
NM_028866	Wdr33	1069.74	-0.915429	0.229466	-3.98938	6.62454e-05	0.000308347
NM_028868	Cxxc1	1528.51	-1.12609	0.220912	-5.09748	3.44203e-07	2.50012e-06
NM_028870	Cltb	1177.23	-1.27565	0.310355	-4.1103	3.95141e-05	0.000194283
NM_028871	Hnrnpr	618.531	-1.45776	0.259076	-5.62676	1.83623e-08	1.66103e-07
NM_028873	Dnajc14	1012.98	-1.33184	0.278158	-4.78806	1.68402e-06	1.07647e-05
NM_028875	Xrcc3	1521.73	-1.52862	0.308788	-4.95037	7.40722e-07	5.06532e-06
NM_028882	Sema3d	172.603	-2.86075	0.502275	-5.69558	1.2295e-08	1.14492e-07
NM_028922	Ppapdc2	632.753	-2.26911	0.397255	-5.71196	1.1168e-08	1.05028e-07
NM_028923	Gle1	1813.24	-1.33473	0.239953	-5.56245	2.66008e-08	2.36127e-07
NM_028927	Tktl2	7.60954	-3.35945	1.07773	-3.11716	0.00182604	0.0060303
NM_028935	Zfp558	114.628	-2.02595	0.381537	-5.30998	1.09637e-07	8.70447e-07
NM_028938	Lrriq3	353.013	-1.28315	0.392374	-3.27021	0.00107466	0.00377211
NM_028940	Clvs1	181.728	-1.33615	0.357065	-3.74203	0.000182541	0.00077451
NM_028945	Fam208a	64.8394	-1.58873	0.477016	-3.33056	0.000866702	0.00311709
NM_028946	Slc9b1	413.297	-4.08419	0.35468	-11.5151	1.1068e-30	1.54221e-28
NM_028957	Hyal5	11.3894	-3.47262	1.01761	-3.41252	0.000643649	0.00239191
NM_028992	Gsdmc4	183.327	-1.6504	0.423746	-3.89479	9.82821e-05	0.000440457
NM_028998	Themis3	75.8705	-5.13693	0.538021	-9.54782	1.32459e-21	6.98539e-20
NM_029001	Elovl7	1258.67	-2.53405	0.362028	-6.9996	2.56697e-12	4.21483e-11
NM_029007	Fam84a	407.732	-2.21816	0.353263	-6.27907	3.40607e-10	4.09916e-09
NM_029017	Mrpl47	272.49	-1.0406	0.27525	-3.78056	0.000156478	0.000671352
NM_029020	Abcb8	1106.9	-2.10528	0.239534	-8.78906	1.50811e-18	5.40218e-17
NM_029025	Tmem81	27.9108	-1.77073	0.562487	-3.14804	0.00164367	0.00549053
NM_029070	Tmem114	144.845	-1.15657	0.352893	-3.27739	0.00104772	0.0036895
NM_029103	Manf	365.638	-1.09759	0.259945	-4.2224	2.41716e-05	0.000124152
NM_029166	Uhrf1bp1l	1223.85	-1.71023	0.254943	-6.70829	1.9692e-11	2.81887e-10
NM_029169	Rbm6	114.942	-1.7217	0.405746	-4.24329	2.20262e-05	0.000113981
NM_029264	Ttll10	178.091	-2.28486	0.369625	-6.18157	6.34684e-10	7.34724e-09
NM_029271	Mrpl32	813.086	-1.46863	0.359274	-4.08778	4.35522e-05	0.000211942
NM_029295	Cklf	37.0824	-1.7405	0.532728	-3.26715	0.00108637	0.00380617
NM_029300	Iqcf5	79.7509	-2.29897	0.452639	-5.07903	3.79361e-07	2.73457e-06
NM_029330	Fpgt	1148.12	-1.79318	0.453005	-3.9584	7.54526e-05	0.000346425
NM_029377	Lin37	1148.26	-1.11366	0.313248	-3.5552	0.000377689	0.00149384
NM_029389	Fam35a	696.219	-1.69844	0.276137	-6.15071	7.71373e-10	8.81536e-09
NM_029409	Mff	5130.27	-0.977831	0.273315	-3.57768	0.00034666	0.00138404
NM_029416	Klf17	5482.8	-1.02988	0.20227	-5.09159	3.55067e-07	2.57043e-06
NM_029425	Lppr5	10.9655	-3.40784	0.999124	-3.41083	0.000647647	0.00240618
NM_029464	Tex26	288.628	-4.12747	0.398101	-10.3679	3.47139e-25	2.83081e-23
NM_029472	Gstt4	23.5867	-3.21893	0.821024	-3.92063	8.83181e-05	0.000400291
NM_029489	Samd7	1292.89	-2.30905	0.234023	-9.86676	5.80109e-23	3.76525e-21
NM_029495	Epsti1	277.294	-3.11729	0.437209	-7.12998	1.00383e-12	1.74842e-11
NM_029530	Lamp5	8.20916	-4.93082	1.17761	-4.18715	2.82478e-05	0.000143009
NM_029572	Erp44	921.034	-0.928515	0.247513	-3.75138	0.000175861	0.000748804
NM_029578	Tgds	909.33	-1.44441	0.290875	-4.96574	6.84412e-07	4.71422e-06
NM_029590	1700010D01Rik	21.9024	-3.45351	0.756317	-4.56622	4.96599e-06	2.90537e-05
NM_029629	Fahd2a	89.1915	-1.65546	0.465922	-3.55308	0.000380751	0.00150438
NM_029648	Fam204a	1399.47	-1.56437	0.372219	-4.20282	2.63607e-05	0.000134261
NM_029662	Mfsd2a	2766.2	-2.29593	0.217699	-10.5464	5.28014e-26	4.66248e-24
NM_029720	Creld2	1522.59	-1.04109	0.337896	-3.08108	0.00206248	0.00671489
NM_029736	Slc10a7	310.015	-2.06702	0.268434	-7.7003	1.35748e-14	3.01865e-13
NM_029738	Cluap1	341.666	-2.05228	0.384522	-5.33721	9.43864e-08	7.60096e-07
NM_029760	Nubpl	198.822	-0.970701	0.312517	-3.10607	0.0018959	0.00623536
NM_029762	Hyls1	792.603	-1.23297	0.247909	-4.97348	6.57626e-07	4.54207e-06
NM_029766	Dtl	2308.51	-1.59798	0.221253	-7.22243	5.10652e-13	9.18932e-12
NM_029780	Raf1	1581.62	-1.29734	0.266425	-4.86945	1.1191e-06	7.37392e-06
NM_029825	Scfd1	699.474	-0.902885	0.284214	-3.17678	0.00148922	0.00502962
NM_029844	Mrap	55.9816	-1.76402	0.548239	-3.21761	0.00129261	0.00443666
NM_029852	Cep83	1978.65	-2.44717	0.215517	-11.3549	7.01532e-30	9.26511e-28
NM_029862	Cacfd1	301.877	-2.7002	0.28196	-9.57653	1.00357e-21	5.34816e-20
NM_029891	Nkrf	1396.2	-1.75172	0.396456	-4.41844	9.94152e-06	5.51329e-05
NM_029894	Fam162b	66.6814	-4.72564	0.533438	-8.85882	8.08642e-19	3.04001e-17
NM_029896	Wdr82	5018.73	-0.849656	0.208817	-4.06891	4.72335e-05	0.000228175
NM_029909	C330018D20Rik	699.64	-1.94429	0.239564	-8.11597	4.81925e-16	1.26416e-14
NM_029924	Mbd5	2031.98	-1.42117	0.432132	-3.28873	0.0010064	0.00356131
NM_029949	Snapc3	326.028	-1.93284	0.260665	-7.41506	1.21573e-13	2.39177e-12
NM_029952	Zfp955a	810.698	-1.9871	0.316672	-6.27494	3.49758e-10	4.19931e-09
NM_029956	Mmab	323.321	-1.39928	0.359471	-3.89259	9.91788e-05	0.000444213
NM_029965	Rnf170	3164.38	-0.951113	0.278389	-3.41649	0.000634346	0.00236486
NM_029967	Adamtsl1	2481.39	-1.32496	0.206581	-6.41377	1.4196e-10	1.80275e-09
NM_029983	Sla2	181.218	-1.45418	0.401937	-3.61793	0.000296969	0.00120566
NM_029985	Lrrc42	1307.16	-1.11437	0.285882	-3.89802	9.69818e-05	0.0004354
NM_030004	Cryl1	604.603	-1.55831	0.239089	-6.51772	7.13824e-11	9.46034e-10
NM_030016	Trmt13	76.1701	-1.94957	0.427751	-4.55772	5.17114e-06	3.00802e-05
NM_030046	Dnajc21	15635.5	-0.998391	0.218243	-4.57467	4.76965e-06	2.80368e-05
NM_030057	Trappc6b	1475.37	-1.32851	0.227727	-5.83379	5.4182e-09	5.37503e-08
NM_030074	Zfp687	943.672	-1.50639	0.384257	-3.92027	8.84484e-05	0.000400762
NM_030080	Creb3l4	456.465	-1.52171	0.239622	-6.35045	2.14681e-10	2.65303e-09
NM_030098	Rnase6	130.368	-1.5119	0.410454	-3.68349	0.000230059	0.000957034
NM_030139	Zfp449	862.067	-1.34371	0.33457	-4.01623	5.91357e-05	0.000279103
NM_030168	Rictor	4446.37	-2.03624	0.33826	-6.01976	1.74673e-09	1.89903e-08
NM_030198	Gins3	210.042	-1.86505	0.366184	-5.09322	3.52031e-07	2.55088e-06
NM_030203	Tspyl4	1257.63	-1.01922	0.284699	-3.57999	0.000343603	0.00137297
NM_030235	Avl9	1407.56	-1.49361	0.314975	-4.74199	2.11628e-06	1.33536e-05
NM_030250	Nus1	6213.43	-1.58612	0.244807	-6.47907	9.22893e-11	1.19803e-09
NM_030262	Pofut2	1158.49	-1.04185	0.305087	-3.41493	0.00063799	0.00237553
NM_030263	Psd3	191.058	-1.84674	0.335304	-5.50767	3.63607e-08	3.1342e-07
NM_030557	Mynn	1583.85	-1.46624	0.28071	-5.22334	1.75723e-07	1.34799e-06
NM_030563	N4bp1	11866.8	-1.47232	0.215658	-6.82712	8.66369e-12	1.3106e-10
NM_030564	Rnf34	3189.28	-0.966035	0.241779	-3.99553	6.45497e-05	0.000301192
NM_030678	Gys1	576.69	-1.39066	0.360846	-3.8539	0.000116252	0.000513563
NM_030703	Cpn1	16.8781	-4.21656	0.937788	-4.49628	6.91518e-06	3.93805e-05
NM_030720	Gpr84	13.7042	-4.8954	1.01983	-4.80022	1.58488e-06	1.01781e-05
NM_030721	Acox3	2084.69	-1.07693	0.196629	-5.47699	4.32618e-08	3.67484e-07
NM_030733	Gpr63	222.844	-1.66151	0.377423	-4.40225	1.07133e-05	5.90183e-05
NM_030743	Rnf114	12749.1	-1.24185	0.350583	-3.54225	0.00039673	0.00156345
NM_031178	Tlr9	263.596	-4.53949	0.619729	-7.32496	2.38966e-13	4.54813e-12
NM_031180	Klb	13.1552	-2.66338	0.859235	-3.09971	0.00193712	0.00634254
NM_031181	Siglece	133.465	-1.82437	0.363815	-5.01457	5.31525e-07	3.74956e-06
NM_031252	Il23a	27.5243	-2.51136	0.66099	-3.7994	0.000145047	0.000627806
NM_031256	Plekha3	1519.6	-1.23721	0.365392	-3.38599	0.000709225	0.00261006
NM_031257	Plekha2	236.325	-2.0599	0.503106	-4.09437	4.23315e-05	0.000206796
NM_031258	Chrdl1	68.8482	-5.42125	0.759305	-7.13975	9.35005e-13	1.63416e-11
NM_031382	Tex16	204.238	-1.71877	0.380546	-4.5166	6.28401e-06	3.60838e-05
NM_031388	Usp26	184.017	-2.3413	0.480396	-4.87369	1.09534e-06	7.23549e-06
NM_031391	Gtf2a1	741.739	-1.63376	0.343631	-4.7544	1.99039e-06	1.25906e-05
NM_031394	Sytl2	10.3839	-3.54103	1.0222	-3.46413	0.000531951	0.00203048
NM_031863	Cenpq	1817.84	-2.14256	0.393356	-5.44687	5.12645e-08	4.29931e-07
NM_032000	Trps1	5155.25	-5.9389	0.247569	-23.9888	3.63777e-127	5.52505e-123
NM_032002	Nrg4	638.404	-1.78481	0.312127	-5.71821	1.07649e-08	1.0147e-07
NM_032005	Tbx19	369.754	-3.9452	0.322606	-12.2292	2.17105e-34	4.28233e-32
NM_032008	Slmap	5180.25	-1.24454	0.248795	-5.00229	5.66529e-07	3.96336e-06
NM_032396	Kremen1	953.835	-1.40181	0.244341	-5.73709	9.63147e-09	9.17133e-08
NM_032543	Rnf123	698.995	-1.28012	0.254888	-5.02227	5.10642e-07	3.61737e-06
NM_033134	Inpp5e	221.423	-1.00834	0.302484	-3.33352	0.000857539	0.00308999
NM_033320	Glce	10574.4	-2.73874	0.279491	-9.79905	1.13652e-22	7.1923e-21
NM_033322	Lztfl1	750.417	-1.66828	0.440952	-3.78336	0.000154726	0.000664937
NM_033327	Zfp423	450.774	-2.36346	0.444429	-5.31797	1.04932e-07	8.3791e-07
NM_033541	Oas1c	22312	-1.0222	0.211824	-4.82569	1.39517e-06	9.07489e-06
NM_033563	Klf7	860.191	-1.51892	0.260189	-5.83774	5.29149e-09	5.25738e-08
NM_033569	Cnnm2	93.1903	-1.41059	0.379048	-3.72139	0.000198128	0.000833105
NM_033622	Tnfsf13b	54.7906	-4.49472	0.56347	-7.97685	1.50119e-15	3.75001e-14
NM_033623	Dcun1d1	96.1802	-1.75142	0.402079	-4.35591	1.32514e-05	7.15219e-05
NM_052976	Ophn1	1682.17	-1.09835	0.246943	-4.44776	8.67693e-06	4.85326e-05
NM_053009	Zfp91	2965.85	-2.07414	0.225263	-9.20765	3.33356e-20	1.4845e-18
NM_053011	Lrp1b	226.882	-4.44065	0.375942	-11.8121	3.38163e-32	5.35002e-30
NM_053069	Atg5	3072.63	-1.06783	0.233444	-4.57423	4.77977e-06	2.80724e-05
NM_053072	Fgd6	12312.3	-2.42202	0.403335	-6.00498	1.9136e-09	2.06859e-08
NM_053077	Slc45a2	25.6749	-3.56155	0.672719	-5.29427	1.19495e-07	9.40359e-07
NM_053108	Glrx	5681.79	-1.14829	0.215762	-5.32203	1.02615e-07	8.20703e-07
NM_053117	Pard6g	259.007	-1.83554	0.278221	-6.59742	4.18366e-11	5.73997e-10
NM_053119	Echs1	241.975	-0.920157	0.301559	-3.05133	0.00227826	0.00731549
NM_053142	Pcdhb17	52.9776	-3.67861	0.672078	-5.47349	4.41269e-08	3.73786e-07
NM_053157	Tm2d1	180.47	-1.74937	0.415766	-4.20758	2.58123e-05	0.000131733
NM_053159	Mrpl3	274.223	-0.92108	0.27031	-3.40749	0.000655627	0.00243166
NM_053171	Csmd1	355.589	-3.238	0.451607	-7.16995	7.50231e-13	1.32034e-11
NM_053180	Cdk20	1251.74	-2.14699	0.405338	-5.29678	1.17866e-07	9.29945e-07
NM_053217	2010002M12Rik	6290.23	-1.06459	0.325478	-3.27085	0.00107226	0.00376457
NM_053268	Rasa2	5546.17	-1.42203	0.364978	-3.89623	9.77035e-05	0.000438252
NM_054043	Msi2	628.783	-2.01006	0.516318	-3.89306	9.89889e-05	0.000443494
NM_054058	Psg20	168.493	-1.26146	0.396506	-3.18145	0.0014654	0.00495911
NM_054077	Prelp	2345.04	-1.77606	0.292317	-6.07579	1.23381e-09	1.37283e-08
NM_054085	Alpk3	20.6895	-2.85422	0.931511	-3.06407	0.00218345	0.00705731
NM_078477	Klf16	354.796	-1.05612	0.299316	-3.52844	0.000418016	0.00163968
NM_080285	Cttnbp2	1120.82	-1.13634	0.310675	-3.65765	0.000254543	0.00104855
NM_080455	Tshz2	2489.91	-1.6837	0.285521	-5.89692	3.70355e-09	3.7853e-08
NM_080467	Atp6v0a4	135.143	-3.13746	0.429102	-7.31167	2.63837e-13	4.97783e-12
NM_080556	Tm9sf2	7244.39	-0.888645	0.28402	-3.12881	0.00175516	0.00581912
NM_080708	Bmp2k	3332.51	-1.88997	0.34792	-5.43221	5.56605e-08	4.6449e-07
NM_080728	Myh7	16.4263	-4.27963	0.925303	-4.62512	3.74384e-06	2.24483e-05
NM_080795	Lnx2	7113.04	-1.34827	0.318321	-4.23556	2.27984e-05	0.000117776
NM_080844	Serpinc1	1310.56	-3.04141	0.269568	-11.2825	1.60041e-29	2.00885e-27
NM_080847	Asb15	192.573	-4.34345	0.604378	-7.18664	6.64044e-13	1.17821e-11
NM_080858	Asb12	37.2879	-2.44197	0.726322	-3.3621	0.00077351	0.00282214
NM_126166	Tlr3	235.824	-3.11918	0.478103	-6.52407	6.84227e-11	9.0919e-10
NM_130451	Slc2a10	108.081	-2.17857	0.604384	-3.60461	0.00031262	0.00126111
NM_130454	Recql5	823.141	-0.734032	0.244239	-3.00538	0.00265251	0.00835123
NM_130457	Cntnap4	15.0156	-3.14353	0.937734	-3.35226	0.000801551	0.00291034
NM_130796	Snx18	3048.82	-1.67905	0.334951	-5.01282	5.36369e-07	3.77846e-06
NM_130903	Cd209c	15.9233	-2.84381	0.85821	-3.31365	0.000920853	0.00328848
NM_133192	Npffr2	185.817	-2.13236	0.29126	-7.32115	2.45858e-13	4.66761e-12
NM_133194		1842.08	-2.21827	0.345087	-6.42815	1.29166e-10	1.64717e-09
NM_133210	Sertad3	127.003	-1.27901	0.334423	-3.82453	0.000131023	0.000573479
NM_133212	Tlr8	69.6519	-5.05298	0.646681	-7.81372	5.55229e-15	1.30539e-13
NM_133214	Smco4	539.361	-1.04977	0.280835	-3.73804	0.000185461	0.000785493
NM_133224	Atp13a1	561.946	-1.0965	0.276913	-3.95974	7.50311e-05	0.000344802
NM_133225	Acbd3	10161.1	-1.11521	0.239861	-4.64938	3.32926e-06	2.01856e-05
NM_133236	Glcci1	3161.89	-1.72471	0.383747	-4.4944	6.97672e-06	3.96863e-05
NM_133239	Crb1	113.458	-2.80449	0.525725	-5.33451	9.58016e-08	7.69453e-07
NM_133249	Ppargc1b	319.709	-0.951821	0.290061	-3.28145	0.00103274	0.0036435
NM_133351	Prss8	27.9763	-2.59938	0.741631	-3.50495	0.000456696	0.00177444
NM_133353	Oosp1	9078.81	-1.60399	0.231704	-6.92259	4.43457e-12	7.03785e-11
NM_133363	Myoz3	526.131	-1.6405	0.331496	-4.94878	7.46798e-07	5.09998e-06
NM_133365	Dnah5	200.223	-3.21951	0.346883	-9.28124	1.67514e-20	7.7567e-19
NM_133626	Rrbp1	66.4493	-2.44952	0.463021	-5.29029	1.22125e-07	9.5857e-07
NM_133649	Slc12a6	157.615	-2.56624	0.477506	-5.37426	7.68979e-08	6.28931e-07
NM_133659	Erg	264.48	-1.32158	0.30332	-4.35706	1.31819e-05	7.12227e-05
NM_133681	Tspan1	43.976	-3.22468	0.535714	-6.0194	1.75064e-09	1.90191e-08
NM_133683	Tmem19	226.729	-1.39532	0.270094	-5.16606	2.39085e-07	1.7879e-06
NM_133692	Pold3	5818.48	-0.993376	0.225903	-4.39736	1.09574e-05	6.0145e-05
NM_133697	Smim14	3082.22	-1.30701	0.291851	-4.47835	7.52218e-06	4.25342e-05
NM_133700	Btbd10	2144.87	-1.59448	0.304486	-5.23664	1.63528e-07	1.25947e-06
NM_133704	Sec22a	1347.9	-1.51922	0.244198	-6.22125	4.93204e-10	5.80681e-09
NM_133730	Krt25	59.85	-1.90655	0.647259	-2.94558	0.00322348	0.00993269
NM_133738	Antxr2	639.161	-2.27982	0.246638	-9.2436	2.38347e-20	1.0806e-18
NM_133750	Fam118a	566.556	-1.58152	0.231128	-6.84261	7.77616e-12	1.18579e-10
NM_133756	Gpn1	343.359	-0.983393	0.285353	-3.44623	0.000568467	0.00214666
NM_133761	Dcp1a	32836.9	-3.09061	0.252028	-12.263	1.43146e-34	2.93798e-32
NM_133762	Ncapg2	3837.34	-2.41733	0.27589	-8.76193	1.91932e-18	6.74783e-17
NM_133771	Memo1	828.987	-1.41985	0.28372	-5.00443	5.60286e-07	3.92692e-06
NM_133778	Fam131a	169.334	-2.86164	0.549099	-5.21152	1.87303e-07	1.42809e-06
NM_133786	Smc4	29973.2	-0.832758	0.282223	-2.95071	0.00317042	0.00978904
NM_133788	Icmt	1879.76	-1.63829	0.242381	-6.75916	1.38795e-11	2.03935e-10
NM_133794	Qars	82.3431	-1.49647	0.456989	-3.27464	0.00105798	0.00372216
NM_133815	Lbr	2185	-1.09334	0.239432	-4.56638	4.9622e-06	2.90427e-05
NM_133816	Sh3bp4	184.203	-2.33091	0.311542	-7.48187	7.32696e-14	1.48178e-12
NM_133829	Mfsd6	472.475	-1.2632	0.357609	-3.53236	0.000411871	0.00161892
NM_133832	Rdh10	2436.36	-1.51621	0.325742	-4.65462	3.24572e-06	1.97342e-05
NM_133839	Mmadhc	1362.92	-1.72087	0.31029	-5.54602	2.92247e-08	2.56866e-07
NM_133851	Nusap1	2328.26	-1.29457	0.302351	-4.28169	1.85479e-05	9.74084e-05
NM_133857	Usp53	2404.7	-0.925807	0.285827	-3.23904	0.00119931	0.00414554
NM_133867	Eps8l3	293.415	-4.84128	0.347011	-13.9514	3.0853e-44	1.56198e-41
NM_133886	AU040320	379.373	-1.05286	0.292361	-3.60124	0.000316701	0.00127554
NM_133891	Slc44a1	182.136	-1.12031	0.319769	-3.50349	0.00045921	0.00178298
NM_133893	Oas1d	8553.81	-1.44063	0.292453	-4.92601	8.39246e-07	5.6651e-06
NM_133894	Ugt2b38	27.4962	-5.62145	0.892567	-6.29807	3.0138e-10	3.65604e-09
NM_133895	Slc15a4	1417.03	-1.36209	0.226033	-6.02606	1.68002e-09	1.83043e-08
NM_133911	Adgra2	1555.32	-1.63447	0.253246	-6.45409	1.08874e-10	1.39897e-09
NM_133921	Nfxl1	3580.32	-1.22817	0.244753	-5.01799	5.22155e-07	3.69032e-06
NM_133922	Krba1	201.455	-1.34004	0.29101	-4.6048	4.1287e-06	2.45332e-05
NM_133927	Itfg2	59.0502	-1.62505	0.533727	-3.04473	0.00232889	0.00745756
NM_133940	Fbxl14	2948.64	-1.61309	0.278476	-5.79257	6.93159e-09	6.73988e-08
NM_133942	Plekha1	927.103	-0.842219	0.2738	-3.07604	0.00209771	0.00680916
NM_133948	Psip1	7430.9	-0.901228	0.232984	-3.86819	0.000109644	0.000486923
NM_133969	Cyp4v3	38.5922	-2.76322	0.776023	-3.56075	0.000369795	0.00146518
NM_133973	Cog4	827.504	-0.943623	0.296539	-3.18212	0.00146199	0.00494979
NM_133976	Imp3	469.257	-1.26204	0.340267	-3.70896	0.000208109	0.000870494
NM_133991	Ftsj1	225.852	-0.893115	0.297965	-2.99738	0.00272312	0.00855403
NM_134005	Enpp3	28.5295	-4.26358	0.751048	-5.67684	1.37204e-08	1.26986e-07
NM_134012	Mbtd1	14635.3	-2.52249	0.285668	-8.83014	1.04544e-18	3.82604e-17
NM_134033	Ccdc117	17348.6	-0.734418	0.220089	-3.33691	0.000847168	0.00305697
NM_134034	Smek2	1352.59	-1.10842	0.306937	-3.61123	0.000304753	0.00123396
NM_134046	Cenpo	2027.65	-2.40273	0.288504	-8.32825	8.20485e-17	2.37815e-15
NM_134063	Fam208b	5496.8	-1.63365	0.311824	-5.239	1.61453e-07	1.24474e-06
NM_134071	Ankrd32	461.282	-1.46312	0.447243	-3.27142	0.0010701	0.00375872
NM_134077	Rbm26	5903.34	-2.33709	0.304683	-7.67057	1.7123e-14	3.75272e-13
NM_134080	Flnb	7612.84	-1.59626	0.301004	-5.30312	1.13839e-07	9.00986e-07
NM_134091	Sgsm3	530.708	-1.17323	0.254548	-4.60906	4.04497e-06	2.40638e-05
NM_134103	Il1rap	106.424	-3.88843	0.479843	-8.10354	5.33832e-16	1.3955e-14
NM_134109	Ildr1	179.512	-5.39137	0.530977	-10.1537	3.19108e-24	2.34136e-22
NM_134130	Abhd3	159.66	-2.16122	0.449256	-4.81067	1.50428e-06	9.70564e-06
NM_134141	Ciapin1	419.997	-1.07047	0.295184	-3.62644	0.000287356	0.00117164
NM_134246	Acot3	529.954	-3.5945	0.343741	-10.457	1.36117e-25	1.18813e-23
NM_134255	Elovl5	4228.84	-0.891334	0.227578	-3.9166	8.98062e-05	0.000406278
NM_134437	Il17rd	2951.04	-3.04772	0.286814	-10.6261	2.25341e-26	2.03719e-24
NM_138311	H1foo	18681.5	-1.78654	0.264145	-6.76346	1.34733e-11	1.98672e-10
NM_138587	Fam3c	2580.83	-0.770526	0.246849	-3.12144	0.00179969	0.00595247
NM_138591	Gfm1	1203.52	-0.772905	0.24895	-3.10465	0.00190502	0.00625758
NM_138592	Usp39	681.032	-0.967575	0.252775	-3.82781	0.000129287	0.000566698
NM_138657	Socs7	7103.09	-0.779696	0.201726	-3.86512	0.000111033	0.000492081
NM_138666	Nlgn1	29.8489	-2.97026	0.656759	-4.5226	6.1084e-06	3.51285e-05
NM_138667	Tab2	4109.06	-1.31092	0.313844	-4.17697	2.95411e-05	0.000148616
NM_138668	Ufsp2	362.669	-0.740945	0.249954	-2.96433	0.00303345	0.00941977
NM_138677	Edem1	1067.58	-0.794887	0.237467	-3.34736	0.000815851	0.00295661
NM_138682	Lrrc4	639.301	-2.21823	0.248806	-8.91553	4.85499e-19	1.85737e-17
NM_138742	Nap1l3	279.255	-1.42212	0.382909	-3.71399	0.000204016	0.000855018
NM_138743	Smim11	132.136	-2.01701	0.358109	-5.63238	1.77735e-08	1.6116e-07
NM_138745	Mthfd1	1027.76	-0.924086	0.230143	-4.01526	5.93792e-05	0.000280165
NM_138954	Rfpl4	797.637	-2.15037	0.253474	-8.48361	2.18304e-17	6.80821e-16
NM_138956	Rassf3	2412.1	-1.37168	0.215176	-6.37468	1.83345e-10	2.29189e-09
NM_139141	Zkscan8	13.757	-3.73763	0.9596	-3.89499	9.82036e-05	0.000440235
NM_139198	Plac8	476.13	-3.20679	0.41532	-7.72127	1.15179e-14	2.59932e-13
NM_139227	Atxn7	3485.01	-1.05135	0.254723	-4.12741	3.66865e-05	0.000181319
NM_139291	Cdc26	99.7271	-1.37747	0.389528	-3.53625	0.00040585	0.0015969
NM_139299	Il31ra	457.368	-3.43394	0.934458	-3.67479	0.000238042	0.00098646
NM_139303	Kif18a	1733.64	-1.18321	0.321263	-3.683	0.000230501	0.000958613
NM_139304	Gatad2b	12546.7	-1.09143	0.27392	-3.98449	6.7624e-05	0.00031409
NM_139305	Car9	1159.02	-1.90891	0.209083	-9.12992	6.85487e-20	2.91629e-18
NM_139309	Fktn	144.097	-1.0734	0.350611	-3.06153	0.00220212	0.00710857
NM_144525	Tmem214	1171.62	-0.950451	0.317934	-2.98946	0.00279472	0.0087518
NM_144534	Tmem38a	407.376	-1.05794	0.274884	-3.84867	0.000118759	0.000524183
NM_144535	Ap5m1	279.392	-2.30374	0.337215	-6.83165	8.39408e-12	1.27108e-10
NM_144538	Rab3il1	342.181	-0.948765	0.314058	-3.02098	0.00251957	0.00799399
NM_144548	Il23r	145.021	-7.5534	0.700091	-10.7892	3.87305e-27	3.97458e-25
NM_144551	Trib2	205.885	-2.93781	0.651935	-4.5063	6.5968e-06	3.76946e-05
NM_144552	Stxbp6	1356.73	-1.26897	0.410706	-3.08972	0.00200346	0.00654238
NM_144553	Dlgap5	5829.21	-0.75481	0.23798	-3.17174	0.00151526	0.00510624
NM_144557	Myrip	3755.08	-0.933129	0.258925	-3.60386	0.000313523	0.00126419
NM_144559	Fcgr4	8.6367	-3.08486	0.994628	-3.10152	0.00192527	0.00631418
NM_144784	Acat1	2359.33	-1.68469	0.283916	-5.93377	2.96051e-09	3.08396e-08
NM_144804	Depdc7	9756.93	-1.65473	0.289808	-5.70977	1.13132e-08	1.06262e-07
NM_144818	Ncaph	2598.82	-0.764364	0.224859	-3.39931	0.00067557	0.0024977
NM_144825	Taok1	10298.1	-1.21317	0.257987	-4.70246	2.57041e-06	1.59735e-05
NM_144830	Tmem106a	31.5394	-2.34094	0.597705	-3.91655	8.98263e-05	0.000406278
NM_144837	Ice1	14925.6	-1.4626	0.192434	-7.60053	2.94922e-14	6.24724e-13
NM_144851	Senp1	6128.84	-0.670411	0.212467	-3.15537	0.00160297	0.00536725
NM_144878	Fmo4	37.4859	-3.35156	0.734759	-4.56144	5.08042e-06	2.96319e-05
NM_144884	Tor1a	1400.84	-1.93876	0.25341	-7.65069	1.9991e-14	4.34991e-13
NM_144892	Ncoa5	726.723	-0.911417	0.2768	-3.29269	0.000992324	0.00351889
NM_144909	Gckr	152.964	-3.15011	0.370719	-8.49728	1.94084e-17	6.11566e-16
NM_144915	Daglb	1002.98	-0.918105	0.256771	-3.57558	0.000349452	0.00139267
NM_144934	Mbd3l2	2223.61	-3.55969	0.317967	-11.1952	4.30666e-29	5.23276e-27
NM_144937	Usp3	2104.33	-1.12627	0.32002	-3.51937	0.00043258	0.00168982
NM_144942	Csad	375.468	-1.56288	0.34472	-4.53377	5.79388e-06	3.34083e-05
NM_144945	Lgi2	83.4256	-2.77639	0.652363	-4.2559	2.08212e-05	0.000108326
NM_145070	Hip1r	417.696	-0.807423	0.267425	-3.01925	0.00253401	0.00802811
NM_145076	Trim24	7209.57	-1.26855	0.299617	-4.2339	2.29674e-05	0.000118573
NM_145123	Crtac1	8.18826	-3.12047	1.02346	-3.04895	0.0022964	0.00736284
NM_145131	Pitrm1	1464.99	-1.11913	0.296299	-3.77704	0.000158704	0.00068052
NM_145153	Oas1f	343.582	-2.47359	0.312483	-7.91592	2.45429e-15	5.97369e-14
NM_145158	Emilin2	708.183	-1.3784	0.238082	-5.78957	7.0566e-09	6.85266e-08
NM_145209	Oasl1	69.334	-1.34206	0.423697	-3.16749	0.00153761	0.00517121
NM_145210	Oas1e	10906.2	-1.29441	0.232816	-5.55978	2.7012e-08	2.39497e-07
NM_145223	Alms1	3803.57	-1.75972	0.250711	-7.01892	2.23594e-12	3.71142e-11
NM_145355	Rnf185	5311.39	-2.10241	0.253486	-8.294	1.09504e-16	3.12622e-15
NM_145367	Txndc5	2425.25	-1.37182	0.289852	-4.73284	2.214e-06	1.38952e-05
NM_145394	Slc44a3	133.946	-1.16135	0.352357	-3.29594	0.000980945	0.00348342
NM_145396	Tbl3	283.167	-1.00856	0.332835	-3.03021	0.00244385	0.00778793
NM_145409	Chtf18	71.3834	-1.76025	0.536736	-3.27954	0.00103975	0.00366483
NM_145415	Diexf	1879.26	-1.06501	0.245597	-4.33641	1.44831e-05	7.77001e-05
NM_145442	Mbip	458.941	-1.30282	0.363306	-3.58603	0.000335755	0.00134408
NM_145470	Deptor	39.2468	-1.66371	0.553007	-3.00849	0.00262552	0.00828343
NM_145471	Lrrc14	208.003	-1.55159	0.295074	-5.25831	1.45386e-07	1.12659e-06
NM_145483	Zfp160	569.661	-1.5763	0.361154	-4.36463	1.27339e-05	6.89928e-05
NM_145484	Zfp758	115.281	-3.15723	0.448804	-7.03476	1.99603e-12	3.3535e-11
NM_145514	Wdr26	5395.95	-1.46317	0.262213	-5.58008	2.40406e-08	2.14277e-07
NM_145546	Gtf2b	3706.36	-1.47692	0.259758	-5.68576	1.30236e-08	1.20906e-07
NM_145549	Efcab7	204.759	-1.75344	0.29878	-5.86866	4.39337e-09	4.43071e-08
NM_145556	Tardbp	687.284	-2.26027	0.272384	-8.29811	1.05777e-16	3.03122e-15
NM_145563	Zfp932	412.349	-3.13949	0.510264	-6.15269	7.61811e-10	8.71921e-09
NM_145565	Sds	4.45808	-3.9846	1.24907	-3.19005	0.00142247	0.00483536
NM_145568	Krcc1	872.411	-1.33984	0.230781	-5.80567	6.41104e-09	6.27389e-08
NM_145581	Siglecf	16.5042	-3.47058	0.809734	-4.28607	1.81861e-05	9.56074e-05
NM_145588	Kif22	1509.47	-1.07001	0.321814	-3.32493	0.000884403	0.00317249
NM_145589	Prr14	3472.08	-2.28625	0.219532	-10.4142	2.13632e-25	1.80258e-23
NM_145590	BC017158	314.227	-1.92771	0.453563	-4.25014	2.13635e-05	0.00011074
NM_145591	Zfp958	925.813	-1.48599	0.412382	-3.60343	0.000314046	0.00126585
NM_145609	Msantd4	639.018	-0.7992	0.261606	-3.05498	0.00225079	0.00724412
NM_145611	Kank2	1716.49	-1.46615	0.232783	-6.29838	3.00772e-10	3.65157e-09
NM_145624	Zfp709	957.191	-2.03366	0.484101	-4.20091	2.65841e-05	0.000135308
NM_145705	Tinf2	816.157	-1.36082	0.266127	-5.11341	3.16395e-07	2.31474e-06
NM_145708	Obox2	6250.92	-2.15706	0.393144	-5.48668	4.09566e-08	3.50056e-07
NM_145709	Obox5	6378.8	-3.25815	0.348762	-9.34206	9.44802e-21	4.45641e-19
NM_145711	Tox	273.205	-3.78683	0.397467	-9.5274	1.61276e-21	8.47566e-20
NM_145743	Lace1	101.456	-1.27074	0.391976	-3.24188	0.00118743	0.00410999
NM_145820	Veph1	12.756	-2.96908	0.937561	-3.16681	0.00154122	0.00518221
NM_145831	Dmrt2	25.5865	-6.44161	1.07798	-5.97563	2.29203e-09	2.43436e-08
NM_145838	St8sia6	193.181	-2.30288	0.452284	-5.09167	3.54929e-07	2.57043e-06
NM_145856	Il17f	228.802	-1.74708	0.466879	-3.74204	0.000182533	0.00077451
NM_145857	Nod2	334.539	-1.90429	0.317535	-5.99711	2.0086e-09	2.15899e-08
NM_145923	Rell1	1189.04	-1.81811	0.258618	-7.03008	2.06409e-12	3.46403e-11
NM_145928	Tspan14	1745.08	-1.4019	0.264004	-5.31014	1.09539e-07	8.70124e-07
NM_145949	Ido2	62.6381	-3.38493	0.50798	-6.66352	2.67349e-11	3.74239e-10
NM_145960	Mtrf1	116.534	-1.92868	0.416946	-4.62572	3.73293e-06	2.24019e-05
NM_145965	Gphn	79.6219	-1.1313	0.381438	-2.96588	0.00301815	0.00937812
NM_145970	Cc2d1a	458.708	-1.34181	0.371489	-3.61197	0.000303879	0.00123141
NM_145979	Chd4	7051.53	-0.789107	0.221267	-3.56631	0.000362045	0.00143772
NM_145983	Kcna5	9.07527	-3.42473	1.11496	-3.0716	0.00212912	0.00689932
NM_145999	Rhot2	784.031	-0.861106	0.281208	-3.06217	0.0021974	0.00709483
NM_146050	Oit1	36.9763	-3.93508	0.888152	-4.43064	9.39539e-06	5.23467e-05
NM_146096	Abhd17b	1511.21	-1.39421	0.448024	-3.11191	0.00185879	0.00612925
NM_146105	Cnst	6646.61	-2.19961	0.237055	-9.27889	1.71253e-20	7.90577e-19
NM_146116	Tubb4b	9796.61	-1.04545	0.302349	-3.45775	0.000544708	0.00207062
NM_146146	Lepr	4.79532	-4.05634	1.24585	-3.25589	0.00113037	0.00393764
NM_146149	Fam151a	149.472	-2.14724	0.366267	-5.8625	4.55947e-09	4.57997e-08
NM_146151	Tesk2	324.855	-1.71445	0.294182	-5.82786	5.61415e-09	5.54047e-08
NM_146155	Ahdc1	1021.64	-1.80977	0.395701	-4.57357	4.79483e-06	2.8139e-05
NM_146159	Haus3	3770.6	-2.03239	0.331445	-6.13192	8.68275e-10	9.82664e-09
NM_146169	Paip2b	7162.11	-1.09935	0.228136	-4.81883	1.44404e-06	9.35671e-06
NM_146173	Tspan33	471.304	-1.16202	0.30572	-3.80091	0.000144164	0.000625056
NM_146176	Cnot3	7204.32	-1.29174	0.223215	-5.78694	7.16788e-09	6.95183e-08
NM_146179	Zfp418	186.322	-1.51918	0.418874	-3.62682	0.000286934	0.00117055
NM_146208	Neil3	4326.14	-1.47036	0.30037	-4.89517	9.82194e-07	6.55429e-06
NM_146215	Cmtr2	737.756	-1.02591	0.268722	-3.81775	0.000134675	0.000588111
NM_146235	Ercc6l	2913.53	-1.0154	0.235493	-4.31183	1.6191e-05	8.60121e-05
NM_146243	Actr2	4272.4	-1.89493	0.301025	-6.29493	3.07548e-10	3.72788e-09
NM_146250	Gpr1	945.36	-3.12526	0.256826	-12.1688	4.55782e-34	8.76255e-32
NM_146261	Fam199x	4831.78	-2.05931	0.335147	-6.14452	8.02079e-10	9.12606e-09
NM_146311	Olfr510	10.26	-5.15755	1.16755	-4.4174	9.98936e-06	5.53717e-05
NM_146379	Olfr654	5.66765	-4.08497	1.25146	-3.26418	0.00109783	0.00383992
NM_146759	Olfr214	28.9645	-2.96825	0.741464	-4.00323	6.24843e-05	0.000292724
NM_146767	Olfr1104	44.999	-4.78973	0.716956	-6.68065	2.37878e-11	3.36159e-10
NM_147221	Glis1	743.496	-1.39683	0.355208	-3.93243	8.40923e-05	0.000382852
NM_148940	Prss44	73.5185	-2.13996	0.594039	-3.60239	0.000315302	0.00127058
NM_148952	E2f4	1419.93	-0.817698	0.271964	-3.00664	0.00264151	0.00832179
NM_148958	Osbpl10	373.691	-1.03624	0.298713	-3.46902	0.000522352	0.00199836
NM_152229	Nr2e1	3168.21	-2.89515	0.254154	-11.3913	4.61833e-30	6.20737e-28
NM_152818	Osbp2	1578.57	-0.669386	0.215022	-3.1131	0.00185134	0.00610771
NM_153059	Tmem5	1120.93	-0.959814	0.228268	-4.20476	2.61354e-05	0.000133247
NM_153063	Zfp472	156.521	-2.69531	0.382458	-7.04733	1.82383e-12	3.0744e-11
NM_153075	Catsper2	145.309	-1.2281	0.337228	-3.64175	0.000270793	0.00111157
NM_153094	Klrb1f	47.4746	-7.44449	1.0031	-7.4215	1.15803e-13	2.28419e-12
NM_153097	Trim60	10497.2	-2.64721	0.246874	-10.723	7.94269e-27	7.49277e-25
NM_153110	Trim61	26.1328	-2.37943	0.613832	-3.87635	0.000106037	0.000472282
NM_153116	Gtpbp10	415.487	-2.63854	0.324975	-8.11921	4.6921e-16	1.23293e-14
NM_153126	Nat10	712.098	-1.20417	0.26539	-4.53736	5.6962e-06	3.2895e-05
NM_153158	E130308A19Rik	122.738	-3.67357	0.460629	-7.97512	1.52229e-15	3.79646e-14
NM_153179	Pkhd1	125.986	-2.40403	0.434142	-5.53744	3.06917e-08	2.68672e-07
NM_153397	Adam32	70.2395	-3.94594	0.492024	-8.01981	1.05908e-15	2.68088e-14
NM_153402	Ago3	4062.71	-2.29588	0.375973	-6.10649	1.01847e-09	1.14412e-08
NM_153407	Csrnp2	12636	-1.72568	0.248812	-6.93569	4.0423e-12	6.42202e-11
NM_153413	Dock3	2201.44	-1.06443	0.200815	-5.30056	1.15451e-07	9.1279e-07
NM_153417	Trpm6	75.6892	-2.44436	0.454471	-5.37848	7.51163e-08	6.16018e-07
NM_153459	Dusp7	15116.3	-0.820639	0.256516	-3.19917	0.00137822	0.00469862
NM_153505	Nckap1l	282.708	-3.56798	0.338134	-10.552	4.97394e-26	4.44377e-24
NM_153512	Kcng3	186.291	-3.14976	0.482562	-6.52716	6.70272e-11	8.93774e-10
NM_153518	Ccdc65	20.911	-4.18135	0.883893	-4.73061	2.2385e-06	1.40257e-05
NM_153519	Txndc2	42.9426	-1.88906	0.53884	-3.50579	0.000455252	0.00176974
NM_153520	Opalin	78.2299	-3.92725	0.717495	-5.47356	4.41077e-08	3.73786e-07
NM_153525	Tmem41b	1639.2	-1.20457	0.228931	-5.26174	1.42697e-07	1.10802e-06
NM_153533	Tns2	671.222	-0.7186	0.238819	-3.00897	0.00262136	0.00827717
NM_153552	Thoc1	577.984	-0.962972	0.249	-3.86735	0.000110024	0.000488325
NM_153555	Dcaf8	6141.18	-0.967606	0.213211	-4.53825	5.67231e-06	3.27695e-05
NM_153556	Pms1	1242.58	-1.78116	0.289993	-6.14209	8.14413e-10	9.25846e-09
NM_153567	Slain2	53.0314	-1.91685	0.528782	-3.62503	0.000288933	0.00117712
NM_153570	Noc4l	1641.37	-1.12854	0.300447	-3.7562	0.000172515	0.000734965
NM_153585	Cnot10	380.955	-0.771508	0.261212	-2.95357	0.00314123	0.00970835
NM_153587	Rps6ka5	704.435	-0.823166	0.274912	-2.99429	0.00275083	0.00863036
NM_153597	Trpt1	54.2758	-2.348	0.533819	-4.39849	1.09007e-05	5.99855e-05
NM_153601	Lgsn	266.339	-5.60832	0.533894	-10.5046	8.23077e-26	7.22595e-24
NM_153749	Mill1	118.735	-3.54147	0.404308	-8.75933	1.9641e-18	6.88932e-17
NM_153762	Rnf26	803.274	-1.27965	0.3073	-4.16417	3.12486e-05	0.000156532
NM_153774	Ipo9	1534.31	-1.56814	0.204868	-7.65439	1.94232e-14	4.23243e-13
NM_153804	Plekhg3	2327.19	-0.797155	0.24571	-3.24428	0.00117746	0.00408106
NM_153820	Arhgap15	113.518	-2.41504	0.520214	-4.6424	3.44377e-06	2.08242e-05
NM_170599	Igsf11	2281.24	-2.81267	0.244533	-11.5022	1.28601e-30	1.77563e-28
NM_170757	Ccdc186	31270.9	-1.19594	0.24123	-4.95767	7.1342e-07	4.90069e-06
NM_170777	Elof1	1116.08	-1.54965	0.367254	-4.21956	2.44777e-05	0.000125512
NM_170779	Wwc1	218.421	-1.36763	0.349787	-3.90989	9.23369e-05	0.000416393
NM_172054	Txndc9	1934.75	-1.38798	0.213887	-6.48932	8.62243e-11	1.12506e-09
NM_172124	B3gat2	175.011	-2.62609	0.434082	-6.04974	1.45078e-09	1.59786e-08
NM_172126	Adam1a	32.4117	-2.88576	0.657533	-4.38876	1.13999e-05	6.24159e-05
NM_172151	Zdhhc8	1816.88	-1.42522	0.305771	-4.66108	3.14558e-06	1.92022e-05
NM_172252	Mrpl21	96.4716	-1.12984	0.376618	-2.99996	0.00270011	0.00848878
NM_172295	Mab21l3	59.4808	-4.59726	0.781748	-5.88074	4.08432e-09	4.14103e-08
NM_172371	Slc16a13	315.134	-1.80965	0.345816	-5.23297	1.66811e-07	1.28344e-06
NM_172378	Slc22a22	21.2961	-3.2717	0.901918	-3.62749	0.000286188	0.00116813
NM_172392	Zfp759	265.874	-3.53908	0.446611	-7.92431	2.29424e-15	5.6111e-14
NM_172393	Aim1	1895.29	-2.10711	0.215823	-9.76316	1.62033e-22	1.00039e-20
NM_172395	Cdc42se1	301.352	-1.75662	0.299262	-5.86984	4.36203e-09	4.40496e-08
NM_172402	Slc25a32	848.685	-1.22604	0.274082	-4.47327	7.70338e-06	4.34779e-05
NM_172477	Dennd2a	431.677	-1.12287	0.236901	-4.73983	2.139e-06	1.34802e-05
NM_172479	Slc38a5	6.00036	-4.4173	1.21807	-3.62646	0.000287329	0.00117164
NM_172481	Nlrp4b	7060.26	-1.25918	0.276247	-4.55818	5.15988e-06	3.00262e-05
NM_172485	Thsd7b	48.9909	-4.37917	0.637599	-6.86822	6.50101e-12	1.00241e-10
NM_172499	Mfsd9	574.804	-1.35146	0.248629	-5.43565	5.4596e-08	4.56108e-07
NM_172503	Zswim4	643.528	-1.67707	0.461974	-3.63023	0.000283171	0.001158
NM_172508	Dse	666.824	-1.63801	0.247465	-6.61915	3.61258e-11	4.99253e-10
NM_172513	Fam126b	3440.65	-1.44272	0.338573	-4.26117	2.0336e-05	0.000106175
NM_172521	Nutm1	54.4515	-4.8279	0.642514	-7.51409	5.731e-14	1.16835e-12
NM_172523	Slc18a2	965.599	-1.75728	0.334086	-5.25996	1.4409e-07	1.11769e-06
NM_172525	Arhgap29	2290.79	-2.50483	0.306661	-8.16808	3.13341e-16	8.45298e-15
NM_172529	Gnptg	524.876	-0.82023	0.259736	-3.15793	0.00158892	0.00532608
NM_172539	Astl	6041.37	-1.1298	0.280623	-4.02606	5.67199e-05	0.000268619
NM_172553	Alx1	22.8881	-5.68963	0.958808	-5.93407	2.95518e-09	3.08053e-08
NM_172555	Papolg	3230.03	-2.09748	0.324564	-6.46244	1.03028e-10	1.32609e-09
NM_172557	Rufy1	2493.54	-1.38887	0.26917	-5.15982	2.47191e-07	1.84036e-06
NM_172562	Tada2a	441.361	-0.921564	0.257193	-3.58316	0.000339461	0.00135749
NM_172569	Unk	1908.44	-0.906654	0.288802	-3.13936	0.00169315	0.00563692
NM_172571	Fbf1	307.298	-1.40913	0.270441	-5.21048	1.88349e-07	1.43535e-06
NM_172585	Larp4b	5829.4	-1.02545	0.219751	-4.6664	3.06525e-06	1.87873e-05
NM_172591	Fcho2	1687.29	-1.16842	0.314522	-3.71491	0.000203278	0.0008524
NM_172592	Srek1	1367.18	-0.864467	0.216488	-3.99315	6.52016e-05	0.000303861
NM_172600	Tmem260	155.443	-1.60957	0.336159	-4.78811	1.68358e-06	1.07647e-05
NM_172606	March6	23862.3	-1.18968	0.246981	-4.8169	1.45808e-06	9.43154e-06
NM_172610	Mpped1	436.23	-3.53088	0.346076	-10.2026	1.93017e-24	1.44411e-22
NM_172626	Rbm27	7493.65	-1.05334	0.339718	-3.10062	0.00193114	0.00633069
NM_172628	Sh3tc2	35.2256	-2.38144	0.673034	-3.53837	0.000402613	0.00158499
NM_172645	Suco	12320.8	-1.19017	0.337448	-3.52696	0.000420358	0.00164759
NM_172653	Slc39a10	13954.1	-2.16117	0.28152	-7.67678	1.63138e-14	3.58573e-13
NM_172658	Slco4c1	40.4615	-5.59765	0.856065	-6.53882	6.20079e-11	8.3049e-10
NM_172666	Agps	3734.21	-1.18836	0.365394	-3.25226	0.0011449	0.00398206
NM_172669	Ambra1	101.387	-2.44337	0.399394	-6.11769	9.49416e-10	1.0721e-08
NM_172674	Phf20	6804.73	-1.21193	0.1922	-6.30555	2.87167e-10	3.49479e-09
NM_172677	Ythdf3	43.7853	-1.64413	0.481738	-3.41292	0.000642707	0.00238958
NM_172682	Fam160a1	7956.61	-1.10523	0.228344	-4.8402	1.29709e-06	8.47318e-06
NM_172689	Ddx58	282.585	-1.05768	0.313665	-3.372	0.000746236	0.00273368
NM_172692	Gba2	88.7248	-1.3266	0.450067	-2.94755	0.00320299	0.00987758
NM_172694	Megf9	366.743	-1.26239	0.356624	-3.53985	0.000400356	0.00157692
NM_172697	Prpf38a	1045.55	-1.1289	0.291489	-3.8729	0.00010755	0.000478462
NM_172698	Efcab14	4829.69	-1.149	0.249867	-4.59842	4.25706e-06	2.52268e-05
NM_172706	9330182L06Rik	358.939	-1.53919	0.316933	-4.8565	1.19476e-06	7.84524e-06
NM_172730	Ccdc174	1238.65	-1.23875	0.213108	-5.81279	6.14411e-09	6.02432e-08
NM_172740	Zfp420	258.919	-1.36946	0.334457	-4.09459	4.22915e-05	0.000206668
NM_172742	Mtmr10	285.484	-1.2204	0.256134	-4.76472	1.89118e-06	1.1998e-05
NM_172746	Hirip3	3243.71	-1.62166	0.280202	-5.78748	7.14521e-09	6.93427e-08
NM_172747	Kctd13	699.026	-1.93971	0.3317	-5.84779	4.98147e-09	4.96773e-08
NM_172775	Plxnb1	658.501	-2.0636	0.415648	-4.96477	6.87835e-07	4.73565e-06
NM_172804	Syt16	1432.84	-1.13189	0.228514	-4.95325	7.29857e-07	5.00218e-06
NM_172805	Kcnh5	106.81	-2.92928	0.726572	-4.03164	5.53882e-05	0.000263298
NM_172807	Ppwd1	1511.82	-1.23944	0.277643	-4.46417	8.03797e-06	4.51983e-05
NM_172821	Map3k13	184.451	-2.49759	0.50142	-4.98104	6.32433e-07	4.38603e-06
NM_172824	Ccdc14	4791.86	-1.61403	0.318709	-5.06429	4.0993e-07	2.9368e-06
NM_172838	Slc16a12	54.2852	-3.81169	0.635039	-6.00229	1.94554e-09	2.10013e-08
NM_172840	Vwa2	435.257	-2.28386	0.262233	-8.70927	3.05826e-18	1.05326e-16
NM_172841	Slco5a1	715.826	-2.09043	0.430475	-4.85611	1.19716e-06	7.85762e-06
NM_172849	Nyap2	183.258	-5.54739	1.11025	-4.99653	5.83725e-07	4.06493e-06
NM_172856	Cers6	10091.8	-1.52349	0.259859	-5.86275	4.55251e-09	4.57601e-08
NM_172857	Exd1	644.616	-1.5692	0.311853	-5.03186	4.85745e-07	3.45487e-06
NM_172870	Bnc2	5742.3	-1.09983	0.292184	-3.76419	0.000167092	0.000713666
NM_172885	Tmem132d	86.3583	-2.28912	0.432122	-5.29739	1.17471e-07	9.27793e-07
NM_172891	Styk1	593.93	-2.05336	0.241195	-8.51328	1.69083e-17	5.36123e-16
NM_172893	Parp12	10879.2	-1.12852	0.192446	-5.86408	4.51642e-09	4.54274e-08
NM_172896	Nlrp4a	10446.9	-2.1571	0.280703	-7.68464	1.53427e-14	3.38208e-13
NM_172904	Fsd2	104.866	-2.68506	0.384843	-6.97703	3.01486e-12	4.90253e-11
NM_172914	Ccdc113	30.6008	-1.99991	0.613282	-3.26099	0.00111025	0.00387466
NM_172919	Zfp846	206.819	-3.39291	0.312855	-10.845	2.10592e-27	2.25244e-25
NM_172920	Dpy19l1	1454.94	-1.17702	0.215096	-5.47207	4.44814e-08	3.7658e-07
NM_172924	Peak1	21914.4	-1.37676	0.269207	-5.11414	3.15166e-07	2.30686e-06
NM_172930	Tmem255a	49.794	-2.54945	0.683497	-3.73001	0.000191469	0.000807563
NM_172932	Nlgn3	123.603	-3.87668	0.387154	-10.0133	1.33246e-23	9.03458e-22
NM_172943	Alkbh5	8519.36	-1.05736	0.18916	-5.58978	2.27364e-08	2.03249e-07
NM_172946	Krt222	8.23933	-3.23415	1.02466	-3.15631	0.00159778	0.00535224
NM_172979	Muc15	11.6967	-4.55824	1.06533	-4.27871	1.87979e-05	9.85169e-05
NM_172991	Rbm48	1087.53	-1.57708	0.310872	-5.0731	3.9138e-07	2.81453e-06
NM_172992	Phtf2	6638.17	-1.00303	0.338192	-2.96586	0.00301836	0.00937812
NM_173007	Tspan12	182.414	-2.25234	0.460026	-4.89612	9.77479e-07	6.52856e-06
NM_173051	Serpinb1c	107.087	-2.40976	0.436035	-5.52652	3.26648e-08	2.84795e-07
NM_173182	Fndc3b	2573.5	-0.959086	0.292153	-3.28282	0.00102774	0.00362837
NM_173185	Csnk1g1	2120.48	-1.28191	0.276347	-4.63875	3.50516e-06	2.1176e-05
NM_173189	Mcph1	7857.69	-0.682238	0.231534	-2.9466	0.0032129	0.00990412
NM_173364	Zfp445	1033.74	-1.18378	0.231398	-5.11577	3.12467e-07	2.28875e-06
NM_173368	Chd6	3296.7	-1.3731	0.225389	-6.09212	1.11425e-09	1.2471e-08
NM_173381	6720489N17Rik	337.912	-3.73542	0.539994	-6.91752	4.59629e-12	7.24154e-11
NM_173386	Mb21d1	3514.6	-0.705919	0.237867	-2.96771	0.00300031	0.00933021
NM_173413	Rab8b	1460.89	-2.38819	0.304306	-7.848	4.22736e-15	1.00477e-13
NM_173415	Nyx	88.0152	-1.95355	0.524014	-3.72805	0.000192968	0.000813206
NM_173421	Erich5	1730.54	-1.31776	0.281066	-4.68844	2.75289e-06	1.70032e-05
NM_173424	Zbtb37	737.226	-1.72099	0.264329	-6.51081	7.47452e-11	9.87157e-10
NM_173435	4930595M18Rik	5.89829	-4.29705	1.23209	-3.48762	0.000487347	0.00187816
NM_173443	Vcpip1	5209.19	-1.80099	0.269226	-6.68948	2.23959e-11	3.17896e-10
NM_173731	Hmgcll1	554.335	-1.16721	0.372858	-3.13044	0.00174546	0.00579079
NM_173737	Hmces	1083.36	-1.13572	0.273883	-4.14674	3.37242e-05	0.00016777
NM_173744	Tdrp	2296.42	-0.834367	0.273475	-3.05098	0.00228094	0.00732181
NM_173745	Dusp18	963.467	-2.94288	0.253456	-11.611	3.62408e-31	5.19268e-29
NM_173748	Nudcd3	2762.19	-0.678878	0.221986	-3.0582	0.0022267	0.00718028
NM_173754	Usp43	383.236	-0.93764	0.265764	-3.52809	0.000418566	0.00164141
NM_173760	Ppip5k2	4527.34	-1.27545	0.335802	-3.79823	0.000145733	0.000630239
NM_173762	Cenpe	13659.3	-2.3001	0.220503	-10.4312	1.78694e-25	1.52472e-23
NM_173764	Tapt1	1404.86	-1.06909	0.239865	-4.45704	8.30999e-06	4.66436e-05
NM_173773	Oog4	7957.04	-1.56094	0.209133	-7.46383	8.40403e-14	1.68837e-12
NM_174877	Zar1	11670.2	-0.765961	0.239782	-3.1944	0.00140121	0.00477057
NM_175011	E330017A01Rik	7871.32	-1.82464	0.304058	-6.00096	1.96154e-09	2.1129e-08
NM_175017	4933427D06Rik	16801.1	-1.17209	0.29963	-3.91178	9.16175e-05	0.000413764
NM_175024	Nrn1l	135.513	-2.10037	0.335728	-6.25617	3.94544e-10	4.70356e-09
NM_175028	Adnp2	727.83	-1.24546	0.268699	-4.63516	3.56655e-06	2.15041e-05
NM_175036	Leprot	1234.03	-1.40449	0.293902	-4.77878	1.76364e-06	1.12405e-05
NM_175091	Tnks	2948.94	-1.31345	0.275174	-4.77316	1.81357e-06	1.15539e-05
NM_175094	Pdhx	1984.62	-1.46109	0.210063	-6.95549	3.5135e-12	5.65287e-11
NM_175095	Commd2	943.763	-1.06925	0.2735	-3.90951	9.24848e-05	0.000416937
NM_175096	Stbd1	1389.79	-1.78034	0.256111	-6.95143	3.61594e-12	5.79313e-11
NM_175097		491.691	-1.1611	0.281701	-4.12175	3.75998e-05	0.000185471
NM_175104	Fam53c	7195.55	-0.786483	0.22616	-3.47756	0.000506009	0.00194219
NM_175132	Synpo2l	24.3823	-2.31854	0.720572	-3.21764	0.00129251	0.00443666
NM_175136	Rnf122	1692.3	-1.39012	0.239737	-5.79853	6.6897e-09	6.52557e-08
NM_175148	2300002M23Rik	15.6093	-4.11198	0.906019	-4.53851	5.66527e-06	3.27413e-05
NM_175150	Txndc15	107.636	-1.98161	0.524983	-3.77462	0.000160251	0.000686763
NM_175155	Sash1	2212.77	-1.12819	0.227458	-4.96	7.04917e-07	4.84886e-06
NM_175158	Utp20	3594.15	-0.86408	0.249363	-3.46515	0.000529939	0.00202331
NM_175164	Arhgap26	2302.34	-1.5135	0.246288	-6.14527	7.98277e-10	9.09545e-09
NM_175165	Tprg	41.0766	-6.20462	0.844464	-7.34741	2.0209e-13	3.89511e-12
NM_175171	Mast4	4395.24	-1.53014	0.230701	-6.63258	3.29869e-11	4.57957e-10
NM_175179	Amer1	471.212	-3.23935	0.272543	-11.8857	1.40494e-32	2.31938e-30
NM_175199	Hspa12a	1195.92	-1.22817	0.242021	-5.07463	3.88246e-07	2.79698e-06
NM_175210	Abca12	87.3566	-2.69684	0.527138	-5.116	3.12086e-07	2.28762e-06
NM_175213	Mei4	511.038	-4.45766	0.416754	-10.6961	1.06117e-26	9.9488e-25
NM_175226	Rnf139	1252.31	-1.7346	0.241521	-7.182	6.86993e-13	1.21467e-11
NM_175251	Arid2	5516.22	-1.86761	0.235489	-7.9308	2.17741e-15	5.35588e-14
NM_175265	Bora	815.755	-1.97034	0.269123	-7.32132	2.45539e-13	4.66739e-12
NM_175276	Fhod3	5290.36	-1.19557	0.227488	-5.25551	1.47618e-07	1.14273e-06
NM_175290	Nlrp4f	10023	-1.35382	0.292994	-4.62062	3.8259e-06	2.29132e-05
NM_175291	Dock10	259.118	-2.77841	0.360537	-7.7063	1.29514e-14	2.88848e-13
NM_175303	Sall4	2291.05	-1.54018	0.243902	-6.31476	2.70583e-10	3.30355e-09
NM_175307	Fam46b	2550.52	-1.47027	0.334201	-4.39935	1.08577e-05	5.9792e-05
NM_175325	Bbs4	3037.14	-1.46068	0.220278	-6.63109	3.33208e-11	4.61821e-10
NM_175326	D330045A20Rik	123.396	-1.86701	0.482161	-3.87217	0.00010787	0.000479746
NM_175360	Obfc1	197.297	-0.994958	0.319146	-3.11756	0.00182355	0.0060235
NM_175374	Mtrf1l	139.998	-1.22891	0.322542	-3.81008	0.000138923	0.000605269
NM_175406	Atp6v0d2	19.9028	-3.03144	0.80315	-3.77444	0.000160368	0.00068707
NM_175413	Lrrc39	39.0643	-2.29951	0.633526	-3.6297	0.000283754	0.00115976
NM_175448	Clvs2	702.089	-4.91619	0.291128	-16.8867	5.63718e-64	1.42696e-60
NM_175459	Glis3	748.644	-3.87376	0.440506	-8.79388	1.44477e-18	5.1875e-17
NM_175460	Nmnat2	131.323	-1.31838	0.308423	-4.27459	1.91492e-05	0.00010022
NM_175465	Sestd1	1689.2	-1.27985	0.288015	-4.44369	8.84278e-06	4.93765e-05
[truncated: 278 more rows]
