# Supplementary material for: Nuclear m6A reader YTHDC1 regulates alternative polyadenylation and splicing during mouse oocyte development
Source: PLoS Genet. 2018 May 25;14(5):e1007412. doi: 10.1371/journal.pgen.1007412 (PMC5991768; doi:10.1371/journal.pgen.1007412)
Supplement: S5 Table — (XLSX) [file pgen.1007412.s013.xlsx]

## Sheet: S5 Table DE validation
Differential Expression Validation Primers
Target Gene	Oligo 1	Oligo 2	Product Size (bp)
Psat1	5`-CTGTGCAAACGAGACTGTGC	5`-GTCAAGGACTGATGGGCACT	235
Grh13	5`-TGTGAGGAGGGAGACAGAGG	5`-CGTGGTTGCTGTAGTGTTGG	191
Cnnm1	5`-GGGAAAGTGGAAGTGGAGGT	5`-GAGACTCGGAGCGATTCAAC	196
Nupr	5`-GAAGCTGCTGACCAAGTTCC	5`-GTGTGGTGTCTGTGGTCTGG	91
Zfp711	5`-GGTTCCCCTGTTCTCTCTCC	5`-CCTTGTTTCTCCCCTTCTCC	207
Lrp1b	5`-CCCAGTTGTCAGCAGTTGAA	5`-GGTCTGGCTGCAAATACCAT	153
Rgn	5`-TGGATCCTGCTGGGAGATAC	5`-CGGTTGGAAATCTGTCCTGT	250
Trps1	5`-ATGTCAAACAGGAGGCCAAC	5`-ATTTCCTGTTCCTGGCAGTG	235
Tnip3	5`-CTGGCCAACAGGAAGAAAGA	5`-GCACCTGCCTTTACACTTCC	126
Piwil1	5`-GCAGAAGGTGACGTCAGACA	5`-CCTCCCATCTTGCAGTTCAT	204

## Sheet: S5 Table MAJIQ validation
MAJIQ Validation Primers
Exon Skipping and Inclusion			Product Sizes (bp)
Target Gene	Oligo 1	Oligo 2	Exon skipped	Exon included
Tmem2	CATCGCGTAGACACCTGAGT	ACGTAAGGGAACCACCTTCC	190	295
Rap1	AGAGGAGGGAGGAGGAGGAG	GCCTCCTGAACCAAGGACTA	110	195
Dner	GTTGGCCTTCTTTGCTCTTG	TCAGTGTGACCAAGGGTTTG		300
DnerControl	CGCAGCATTGACAGTGAGTT	TCAGTGTGACCAAGGGTTTG	144
Jam2	TGGCTTGTAAAACCCCAAAGA	CGGGCTTCGCAGTAATACTC	305	505
Rad1	GACCATCCATGCCTCTCCTA	GGAGTTTCCTGCATTTCCAA	150	600
Rad1Control	CTGTTTGCCTGGCTTGCTAG	ACTGGGTTAGGAGAGGCATG		248
Parp6	GTTCATGCACACCTCACACC	GACCAGCTCATCCTTGGAAG	152	295
Enpp5	TGCGTGCAGATTACCTTATGC	ATTGGTGTGGCTTCTTCCCA	249	540
Spata7	CCTGCAGCTGGTCAAGAAC	GTGCCAACTCCTTCCTCAGT	152	206
Hip1r	CTCCTGGTGATGACCTCCAC	TGAAGCACAACCTTGTCAGC	81	189
Intron Retention			Product Sizes (bp)
	Oligo 1	Oligo 2	Intron Excised	Intron Retained
Dnpep	GGACAAGCATGAAGAAAACCA	GTACCACACGGGGAGTCATT	177	275
Phf1	CTGATGGGCTGCTGTACTTG	TCAGAGCGACACACACAACA	163	343
Mcph1	CCTTGTCAGACCTCAGCAGA	TACAATCCCAGGGCAAAGGA	486	680
3` UTR Splicing			Product Sizes (bp)
	Oligo 1	Oligo 2	Spliced UTR	Intact UTR
Ifnar1	TTCACCCTCAAGAACCTGCA	CGTGGCACCAGATTTGAGTT	1318	1840
Abl2	ATGGAGAATCAGCCCCACAA	AGCAGCACCTTCCTCAGATT	195	500
Abl2_Spliced	CGACCTACTGTCCAGTGCAA	CCCTGACCATCAGCATTCTT	123
Ikzf5	TCCCTGGATGAAAACTCAGG	AGAGGCAGGGTTTTGGTTTT	180	639
Ikzf5Control	GAAAAGGGCTGTGGGGATTC	TCTGCTTCTTTGTCCCCACT	209

## Sheet: S5 Table APA validation
Alternative Polyadenylation Oligos
Target Gene	Oligo 1	Oligo 2	Product Size (bp)
Arl5a-PRE	TGACAGTAGCAGAAATCTCCCA	TGAGGAGGGGTCAGAAGAGA	163
Arl5a-POST	GTGTTGAACCTGAAGACATCCT	GTACTCCCGGCAATTCTCCT	240
Ddx21-PRE	TCGATGCCAAAGTGAAGGGA	CTGTCCTCTGAAAGCACCAC	221
Ddx21-POST	TCCCCTTGAACTCTGACCAG	GCAAGCAGAGCCAGTATGTC	189
Frs2-PRE	AGTGCTCGCTTACCTTCAGT	TAGAAACCCTTGCCTCTGGG	151
Frs2-POST	AGAGGCGCCGTTATGTCATA	CCGCACTACTGTTCTGCAAA	245
Noc3l-PRE	GAGCCGAAGATCTGCAGTTG	TGTCTCAGGAGCAGCTTCAT	181
Noc3l-POST	GTGCTCTCATTGCTAGTGTGA	AGCCTGGTCTACAAAACCCT	243
Rybp-PRE	AGCGAAACAAACCACACCTC	ACTGGAGGTCACTGTGGAAG	158
Rybp-POST	CCATCCTCAGGCATGCATTC	GCAAGCCTTAACACTGTGCT	195
Scamp1-PRE	GTCCCTCACTGGTCTCAACA	TTGCTGGGCCTTCTCAAAAC	157
Scamp1-POST	CCCTTACCTGCTGTCCTCTC	TCGCCAACTAAGACGTGACA	152
Slc11a2-PRE	TCCTGATCGTCTGCTCCATC	CAGCAGGACTTTCGAGATGC	203
Slc11a2-POST	GGCAGCAGAATTCCTTGCAT	CCTAGAACACACGAGGCAGA	156
Slc25a51-PRE	GCCGTGGGAAATGCAGTTAT	GCCTCTTCTCATGTGCTTCG	189
Slc25a51-POST	TGGCCTTTGTGTTACATGTGT	CAAAGGCTGTGTTGACCCTG	158
